# Supplementary material for: LiTMP-LiBr complex-induced lateral lithiation and cross ester condensation: direct access to isocoumarins from 2-methoxy o-toluate esters
Source: Royal Society of Chemistry journal article supplement (doi:10.1039/d4qo01678e), 2024-10-18
Supplement: d4qo01678e1.pdf [file d4qo01678e1.pdf]

Supporting info

*for*  
**LiTMP-LiBr Complex-Induced Lateral Lithiation and Cross  
Ester Condensation: Direct Access to Isocoumarins from 2-  
methoxy o-Toluate Esters**

Mintu Rehman, Sajib Daimary, Rasajna Madhusudhana, Rajendar Goreti\*

**Table of Contents:**

|                                   | <b>Page number</b> |
|-----------------------------------|--------------------|
| <b>1. General Techniques</b>      | <b>S2</b>          |
| <b>2. Optimization table</b>      | <b>S3</b>          |
| <b>3. Experimental Procedures</b> | <b>S3 – S19</b>    |
| <b>4. X-ray data</b>              | <b>S20 – S23</b>   |
| <b>5. References</b>              | <b>S24</b>         |
| <b>6. NMR data</b>                | <b>S25 – S57</b>   |

**General Techniques:** All the reactions utilizing air- or moisture sensitive reagents were performed under an atmosphere of argon and nitrogen in flame dried glassware. Tetrahydrofuran (THF) was double distilled from LAH, Dichloromethane (DCM) was distilled from CaH<sub>2</sub> before use. Commercially available reagents were used as received. Silicon oil bath was used for reactions that required heating. Reactions were monitored by thin-layer chromatography (TLC) carried out on 0.25 mm silica gel glass plates (60-F<sub>254</sub>) that were analyzed by fluorescence upon 254 nm irradiation or by staining with p-anisaldehyde/AcOH/H<sub>2</sub>SO<sub>4</sub>/EtOH or by staining with KMnO<sub>4</sub> solution. The products were purified by column chromatography on silica gel (spherical, neutral, 100–230 μm) with an eluent of Pet-ether/EtOAc. NMR spectra were recorded with Avance III-500 (Bruker) (<sup>1</sup>H: 500 MHz, <sup>13</sup>C: 125 MHz) spectrometer and referenced to the solvent peak at 7.26 ppm (<sup>1</sup>H), 77.00 ppm (<sup>13</sup>C) for CDCl<sub>3</sub> and 96.16 ppm (<sup>13</sup>C) for CCl<sub>4</sub>. Infrared spectra were recorded with a Bruker-Alpha (ATR-ZnSe) spectrometer and reported as wavenumber (cm<sup>-1</sup>). A Q-Exactive benchtop HRMS was used for the high-resolution analysis.

## Optimization of reaction conditions:

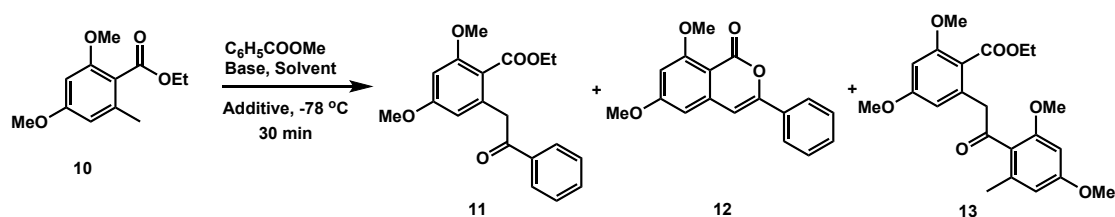

| Entry          | Base(eq)                 | Additive (eq)           | Reaction condition | Solvent           | Yield (%) <sup>c</sup> |    |    |                |
|----------------|--------------------------|-------------------------|--------------------|-------------------|------------------------|----|----|----------------|
|                |                          |                         |                    |                   | 11                     | 12 | 13 | 10             |
| 1              | LDA (1.5)                | LiI (10)                | Condition B        | THF               | -                      | -  | -  | - <sup>a</sup> |
|                |                          |                         | Condition A        | THF               | -                      | -  | -  | -              |
| 2              | LDA (3)                  | LiClO <sub>4</sub> (10) | Condition B        | THF               | -                      | -  | -  | - <sup>a</sup> |
| 3 <sup>b</sup> | LDA (5)                  | LiI (10)                | Condition B        | THF               | -                      | -  | -  | - <sup>a</sup> |
|                |                          |                         | Condition A        | THF               | -                      | -  | -  | -              |
| 4 <sup>b</sup> | LDA (1.5)                | LiCl (10)               | Condition B        | THF               | 18                     | 24 | 12 | 40             |
|                |                          |                         | Condition A        | THF               | -                      | -  | -  | -              |
| 5              | LHMDS (5)                | LiBr (3)                | Condition A        | THF               | -                      | -  | -  | 100            |
| 6 <sup>b</sup> | Li(NCy) <sub>2</sub> (5) | LiBr (3)                | Condition A        | THF:Hexane (2:1)  | -                      | 28 | -  | -              |
| 7              | LiTMP (5)                | LiBr (3)                | Condition A        | THF:Toluene (2:1) | -                      | 33 | -  | -              |

**Table 1:** <sup>a</sup> decomposed starting material. <sup>b</sup> The reactions were conducted for a duration of 2 h, but the results were same as 30 min. Condition A: Base was added to the solution of **10**, methyl benzoate and LiBr mixture in THF at -78 °C. Conditions B: Methyl benzoate was added to the preprepared enolate of **10** at -78 °C. <sup>c</sup> isolated yields.

## Experimental Procedures:

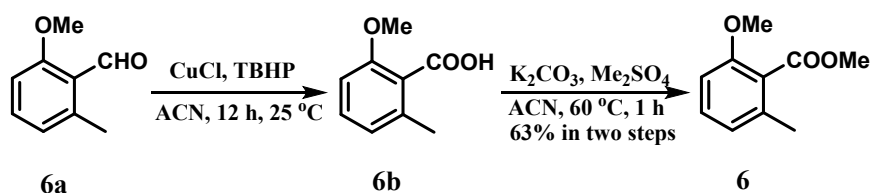

**Preparation of methyl 2-methoxy-6-methylbenzoate (6):** To a stirred suspension of aldehyde **6a** (1.5 g, 9.99 mmol) and CuCl (0.5 g, 0.5 mmol) in acetonitrile (20 mL), was added TBHP (70% in H<sub>2</sub>O, 1.42 mL, 9.99 mmol) dropwise. The reaction mixture was

allowed to stir at room temperature for 12 hr. The reaction mixture was basified using sat.  $\text{NaHCO}_3$  until pH 8.0-8.5 and extracted with EtOAc. The aqueous layer was acidified to pH 2 using 2N HCl and extracted with EtOAc (3 x 20 mL). The combined organic layer was washed with water, brine solution, dried over  $\text{Na}_2\text{SO}_4$  and the crude **6b** was used directly for next step.<sup>4</sup>

To a stirred suspension of crude acid **6b** (1.2 g) and  $\text{K}_2\text{CO}_3$  (6 g, 45 mmol) in acetonitrile (30 mL), was added  $\text{Me}_2\text{SO}_4$  (4.2 mL, 45 mmol). The reaction mixture was heated at 60 °C for 1 hr. The completion of the reaction was confirmed by TLC analysis. After cooling, the reaction mixture was added water (50 mL), extracted with EtOAc (25 mL x 3). The combined organic layer was dried over anhydrous  $\text{Na}_2\text{SO}_4$ , concentrated under vacuum and purified by column chromatography (silica gel, petroleum ether:EtOAc = 7:1) to obtain the corresponding ester **6** (1.13 g, 63% in overall two steps) as yellow oil.  $^1\text{H}$  NMR (500 MHz,  $\text{CDCl}_3$ )  $\delta$  7.18-7.15 (t,  $J$  = 16, 8 Hz, 1H), 6.73-6.72 (d,  $J$  = 7.5 Hz, 1H), 6.69-6.68 (d,  $J$  = 8.5 Hz, 1H), 3.84 (s, 3H), 3.74 (s, 3H), 2.21 (s, 3H).  $^{13}\text{C}\{^1\text{H}\}$  NMR (125 MHz,  $\text{CDCl}_3$ )  $\delta$  168.8, 156.3, 136.4, 130.3, 123.6, 122.3, 108.4, 55.8, 52.2, 19.2. IR (neat,  $\text{cm}^{-1}$ ) 2970, 1735, 1609, 1463, 1324, 1252, 1210, 1145. HRMS (ESI-quadrupole)  $m/z$ :  $[\text{M}+\text{H}]^+$  Calculated for  $\text{C}_{10}\text{H}_{12}\text{O}_3$  181.0870; Found 181.0878.

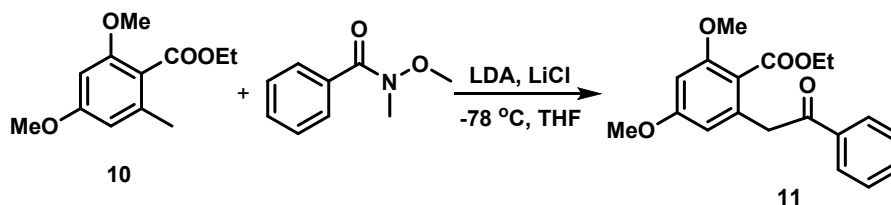

**Ethyl 2,4-dimethoxy-6-(2-oxo-2-phenylethyl)benzoate, (11):**<sup>1</sup> To a stirred solution LDA (2 M in THF, 0.645 mL, 1.2 mmol) and LiCl (0.97 g, 23 mmol) in dry THF (10 mL) at -78 °C under nitrogen atmosphere was added solution of ester **10** (0.515 g, 2.3 mmol) in THF (5 mL) dropwise over 5 minutes. After 45 min, to the deep red colour solution was added Wienreb`s amide (0.56 mg, 2.76 mmol) in THF (5 mL), stirred for 12 hours at the same temperature. Completion of the reaction was confirmed by TLC analysis. The reaction mixture was treated with 1N HCl (5 mL) at -78 °C, warmed to room temperature, and the aqueous solution was extracted with ether (3 x10 mL). The combined organic layer was washed with water, brine solution, dried over anhydrous  $\text{Na}_2\text{SO}_4$ , filtered and concentrated

under reduced pressure. The crude product was purified by column chromatography (silica gel, 10% EtOAc/Pet ether) to obtain compound **11** (0.398 g, 71%) as a yellow oil.  $^1\text{H}$  NMR (500 MHz,  $\text{CDCl}_3$ )  $\delta$  8.01-8.00 (d,  $J = 8$  Hz, 2H), 7.57-7.54 (t,  $J = 14.5$ , 7 Hz, 1H), 7.47-7.44 (t,  $J = 15$ , 7.5 Hz, 2H), 6.41 (s, 1H), 6.35 (s, 1H), 4.33 (s, 2H), 4.24-4.20 (q,  $J = 14.5$ , 7 Hz, 2H), 3.81 (s, 3H), 3.78 (s, 3H), 1.20-1.17 (t,  $J = 14.5$ , 7 Hz, 3H).  $^{13}\text{C}\{^1\text{H}\}$  NMR (125 MHz,  $\text{CDCl}_3$ )  $\delta$  196.6, 167.7, 161.7, 159.1, 136.7, 135.7, 133.2, 128.7, 128.4, 116.5, 107.4, 97.8, 61.0, 56.0, 55.4, 43.8, 14.1. IR (neat,  $\text{cm}^{-1}$ ) 2924, 1740, 1607, 1462, 1377, 1277, 1163. HRMS (ESI-quadrupole)  $m/z$ :  $[\text{M}+\text{H}]^+$  Calculated for  $\text{C}_{19}\text{H}_{20}\text{O}_5$  329.1383; Found 329.1384.

### Preparation of 3-substituted isocoumarin: General procedure: -

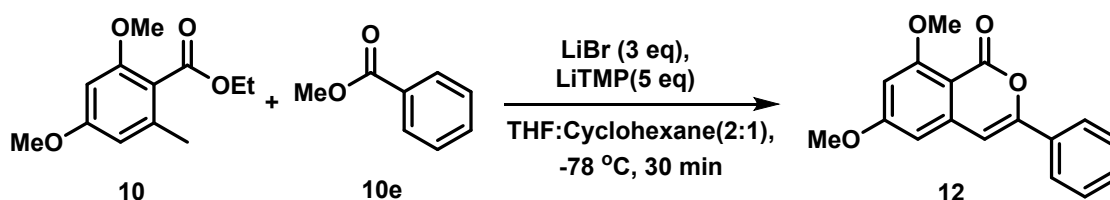

**Conditions A:** To a stirred solution of LiBr (0.230 g, 2.67 mmol) in THF:Cyclohexane (15 mL, 2:1) was added ortho-tolyl ester **10** (0.200 g, 0.89 mmol) and methyl benzoate (0.121 g, 0.89 mmol). The reaction mixture was allowed to stir at rt for 15 min. The reaction mixture was then brought to -78 °C and freshly prepared LiTMP (4.9 mmol, in THF) was added dropwise at -78 °C, until red coloured solution persisting, indicating the generation of orcollinate anion. After stirring for 30 min, the completion of the reaction was confirmed by TLC analysis. The reaction mixture was then treated with saturated aqueous  $\text{NH}_4\text{Cl}$  (10 ml), the organic layer was separated. The aqueous layer was extracted with EtOAc (20 mL x 2), the combined organic layers were washed with water, brine, dried over  $\text{NaSO}_4$ , filtered and the solvents were removed under reduced pressure. The crude product was purified by column chromatography (silica gel, 50% EtOAc/Pet ether) to obtain the desired isocoumarin **12** (0.231 g, 92%) as yellow oil.

**Scale up reaction:** Compound **10** on 1.2 g provided product **12** in 1.35 g, 90% yield.

$^1\text{H}$  NMR (500 MHz,  $\text{CDCl}_3$ )  $\delta$  7.73-7.71 (dd,  $J = 8$ , 1.5 Hz, 2H), 7.33-7.27 (m, 3 H), 6.61 (s, 1H), 6.29-6.27 (dd,  $J = 9.5, 2$  Hz, 2H), 3.85 (s, 3H), 3.78 (s, 3H);  $^{13}\text{C}\{^1\text{H}\}$  NMR (125

MHz, CDCl<sub>3</sub>)  $\delta$  165.2, 163.1, 158.2, 154.1, 142.0, 131.8, 129.8, 128.6, 125.2, 103.3, 101.6, 100.3, 98.6, 56.0, 55.4; IR (neat, cm<sup>-1</sup>) 2953, 1730, 1605, 1463, 1373, 1223. HRMS (ESI-quadrupole) m/z: [M+H]<sup>+</sup> Calculated for C<sub>17</sub>H<sub>14</sub>O<sub>4</sub> 283.0965; Found 283.0956. Melting point 163-164 °C.

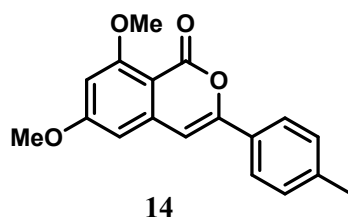

**6,8-dimethoxy-3-(p-tolyl)-1H-isochromen-1-one, (14):**<sup>8</sup> Conditions A was followed for the synthesis of the isocoumarin **14**. The product **14** was obtained as white solid (0.128 g, 91%). <sup>1</sup>H NMR (500 MHz, CDCl<sub>3</sub>)  $\delta$  7.76-7.74 (d, *J* = 8.5 Hz, 2H), 7.23-7.22 (d, *J* = 8 Hz, 2H), 6.71 (s, 1H), 6.41 (s, 2H), 3.98 (s, 3H), 3.91 (s, 3H), 2.40 (s, 3H). <sup>13</sup>C {<sup>1</sup>H} NMR (125 MHz, CDCl<sub>3</sub>) 165.2, 163.3, 158.5, 154.6, 142.4, 140.0, 129.4, 125.3, 103.4, 101.0, 100.1, 98.6, 56.2, 55.5, 21.5. IR (neat, cm<sup>-1</sup>) 2941, 1724, 1605, 1463, 1373, 1221, 1166, 1060. HRMS (ESI-quadrupole) m/z: [M+H]<sup>+</sup> Calculated for C<sub>18</sub>H<sub>16</sub>O<sub>4</sub> 359.1278; Found 359.1272. Melting point 163-165 °C.

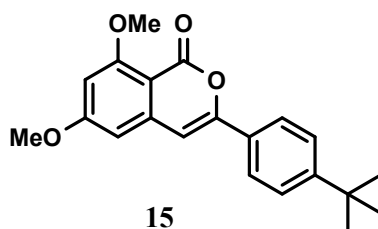

**3-(4-(tert-butyl)phenyl)-6,8-dimethoxy-1H-isochromen-1-one, (15):** Conditions A was followed for the synthesis of the isocoumarin **15**. The product **15** was obtained as pale-yellow liquid (0.138 g, 86%). <sup>1</sup>H NMR (500 MHz, CDCl<sub>3</sub>)  $\delta$  7.64-7.63 (d, *J* = 8.5 Hz, 2H), 7.31-7.29 (d, *J* = 8.5 Hz, 2H), 6.56 (s, 1H), 6.26 (s, 1H), 6.23 (s, 1H), 3.81 (s, 3H), 3.75 (s, 3H), 1.24 (s, 9H). <sup>13</sup>C {<sup>1</sup>H} NMR (125 MHz, CDCl<sub>3</sub>) 165.0, 163.0, 158.2, 154.1, 152.9, 142.1, 128.9, 125.4, 124.9, 103.0, 100.9, 100.0, 98.3, 55.8, 55.3, 34.6, 31.1. IR (neat, cm<sup>-1</sup>) 2978, 1727, 1604, 1572, 1370, 1222, 1166, 1132. HRMS (ESI-quadrupole) m/z: [M+H]<sup>+</sup> calc. for C<sub>21</sub>H<sub>22</sub>O<sub>4</sub> 339.1591; found 339.1590.

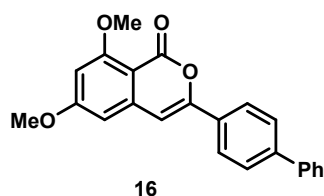

**3-([1,1'-biphenyl]-4-yl)-6,8-dimethoxy-1H-isochromen-1-one, (16):** Conditions A was followed for the synthesis of the isocoumarin **16**. The product **16** was obtained as white solid (0.155 g, 91%).  $^1\text{H}$  NMR (500 MHz,  $\text{CDCl}_3$ )  $\delta$  7.89-7.88 (d,  $J = 8.5$  Hz, 2H), 7.63-7.58 (m, 4H), 7.44-7.41 (t,  $J = 15,7$  Hz, 2H), 7.36-7.33 (t,  $J = 14.5,7$  Hz, 1H), 6.76 (s, 1H), 6.41-6.39 (dd,  $J = 11.5,2$  Hz, 2H), 3.95 (s, 3H), 3.89 (s, 3H).  $^{13}\text{C}\{^1\text{H}\}$  NMR (125 MHz,  $\text{CDCl}_3$ ) 165.3, 163.3, 154.0, 142.6, 142.2, 140.1, 130.7, 128.9, 127.8, 127.3, 127.0, 125.7, 103.4, 101.7, 100.3, 98.7, 56.1, 55.5. IR (neat,  $\text{cm}^{-1}$ ) 2943, 1731, 1605, 1466, 1223, 1134, 1001. HRMS (ESI-quadrupole)  $m/z$ :  $[\text{M}+\text{H}]^+$  Calculated for  $\text{C}_{23}\text{H}_{18}\text{O}_4$  359.1278; Found 359.1272. Melting point 162-164  $^\circ\text{C}$ .

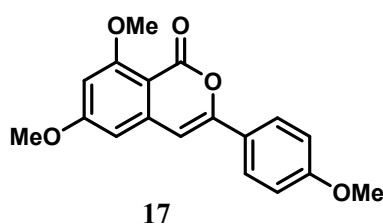

**6,8-dimethoxy-3-(4-methoxyphenyl)-1H-isochromen-1-one, (17):**<sup>9</sup> Conditions A was followed for the synthesis of the isocoumarin **17**. The product **17** was obtained as white solid (0.139 g, 94%).  $^1\text{H}$  NMR (500 MHz,  $\text{CDCl}_3$ )  $\delta$  7.77-7.75 (d,  $J = 9$  Hz, 2H), 6.90-6.89 (d,  $J = 9$  Hz, 2H), 6.59 (s, 1H), 6.36 (s, 2H), 3.95 (s, 3H), 3.88 (s, 3H), 3.84 (s, 3H).  $^{13}\text{C}\{^1\text{H}\}$  NMR (125 MHz,  $\text{CDCl}_3$ ) 165.2, 163.3, 161.1, 158.4, 154.4, 142.6, 126.9, 124.5, 114.1, 103.2, 100.1, 99.9, 98.3, 56.1, 55.4, 55.2. IR (neat,  $\text{cm}^{-1}$ ) 2948, 1732, 1605, 1521, 1468, 1262, 1167. HRMS (ESI-quadrupole)  $m/z$ :  $[\text{M}+\text{H}]^+$  Calculated for  $\text{C}_{18}\text{H}_{16}\text{O}_5$  313.1071; Found 313.1066. Melting point 146-148  $^\circ\text{C}$ .

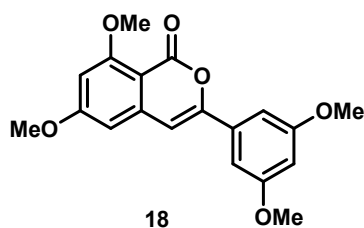

**3-(3,5-dimethoxyphenyl)-6,8-dimethoxy-1H-isochromen-1-one, (18):** Conditions A was followed for the synthesis of the isocoumarin **18**. The product **18** was obtained as pale yellow solid (0.136 g, 84%) <sup>1</sup>H NMR (500 MHz, CDCl<sub>3</sub>) δ 6.97-6.96 (d, *J* = 2 Hz, 2H), 6.73 (s, 1H), 6.49-6.48 (t, *J* = 4.5, 2 Hz, 1H), 6.43 (s, 2H), 3.97 (s, 3H), 3.91 (s, 3H), 3.85 (s, 6H); <sup>13</sup>C{<sup>1</sup>H} NMR (125 MHz, CDCl<sub>3</sub>) 165.4, 163.3, 161.0, 158.6, 154.2, 142.1, 133.9, 103.4, 102.5, 102.3, 100.4, 56.3, 55.6; IR (neat, cm<sup>-1</sup>) 2946, 1734, 1605, 1467, 1371, 1214, 912. HRMS (ESI-quadrupole) *m/z*: [M+H]<sup>+</sup> Calculated for C<sub>19</sub>H<sub>18</sub>O<sub>6</sub> 343.1176; Found 343.1161. Melting point 218-220 °C.

**Preparation of 3-(2-iodophenyl)-6,8-dimethoxy-1H-isochromen-1-one, (19):**  
**Conditions B:** To a stirred solution of LiBr (0.232 g, 2.67 mmol) and ortho-tolyl ester **10** (0.89 mmol) in THF:Cyclohexane (2:1) was added freshly generated LiTMP (4.45 mmol, in THF) dropwise at -78 °C. To the red coloured solution (orcillinate anion), immediately, was added methyl 2-iodo benzoate (0.233 g, 0.89 mmol) in THF (1 M solution) in one shot. After 30 min, completion of the reaction was confirmed by TLC analysis. The reaction mixture was then treated with saturated aqueous NH<sub>4</sub>Cl (10 ml), the organic layer was separated. The aqueous layer was extracted with EtOAc (20 mL x 2), the combined organic layers were washed with water, brine, dried over NaSO<sub>4</sub>, filtered and the solvents were removed under reduced pressure. The crude product was purified by column chromatography (silica gel, 50% EtOAc/ Pet ether) to obtain the desired isocoumarin **12** (0.294 g, 81%) as white solid.

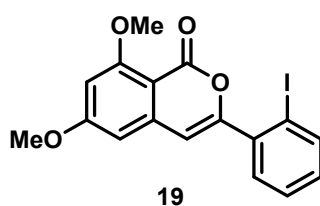

<sup>1</sup>H NMR (500 MHz, CDCl<sub>3</sub>) δ 7.96-7.94 (d, *J* = 8 Hz, 1H), 7.43-7.40 (t, *J* = 15, 7.5 Hz, 1H), 7.12-7.09 (t, *J* = 15.5, 7.5 Hz, 1H), 6.55 (s, 1H), 6.50-6.49 (d, *J* = 2Hz, 1H), 6.44-6.43 (d, *J* = 2.5 Hz, 1H), 4.00 (s, 3H), 3.92 (s, 3H). <sup>13</sup>C{<sup>1</sup>H} NMR (125 MHz, CDCl<sub>3</sub>) 165.5, 163.4, 156.3, 141.6, 140.1, 137.9, 131.0, 130.4, 128.1, 125.4, 107.0, 103.4, 100.6, 99.1, 96.3, 56.3, 55.7. IR (neat, cm<sup>-1</sup>) 2966, 1737, 1607, 1577, 1370, 1223, 1131, 995. HRMS (ESI-quadrupole) *m/z*: [M+H]<sup>+</sup> Calculated for C<sub>17</sub>H<sub>13</sub>IO<sub>4</sub> 408.9931; Found 408.9921. Melting point 161-163 °C.





**Preparation of methyl 3-methoxy-4-(methoxymethoxy)benzoate, (22a):** To a stirred suspension of vanillin (1 g, 6.57 mmol) and  $K_2CO_3$  (1.816g, 13.14 mmol) in acetonitrile (10 mL), MOM chloride (0.75 mL, 9.9 mmol) was added dropwise. The reaction mixture was stirred overnight at room temperature and the completion was confirmed by TLC analysis. The reaction mixture was washed with water (50 mL), extracted with EtOAc (25 mL x 3). The combined organic layer was dried over anhydrous  $Na_2SO_4$ , concentrated under vacuum and purified by column chromatography (silica gel, petroleum ether:EtOAc = 7:1) to obtain the corresponding MOM protected aldehyde **22b** (0.85 g, 66 % yield). The aldehyde was used directly for next step without further purification.

To a stirred solution of aldehyde **22b** (0.85 g, 4.33 mmol) and  $NaH_2PO_4$  (1.82 g, 15.17 mmol) in *t*-BuOH (15 mL) and  $H_2O$  (5 mL),  $NaClO_2$  (2.349 g, 25.98 mmol) was slowly added in  $H_2O$  (5 mL). After stirring at 25 °C for 12 h, the reaction mixture was treated with brine (30 mL), the aqueous layer was washed with ether (2 x 30 mL). The combined organic layer was washed with brine, dried over  $Na_2SO_4$ , filtered, and concentrated under reduced pressure. The crude product obtained was directly used for the next step.

To a stirred suspension of crude acid **22c** (0.8 g) and  $K_2CO_3$  (6 g, 45 mmol) in acetonitrile (30 mL), was added  $Me_2SO_4$  (4.2 mL, 45 mmol). The reaction mixture was heated at 60 °C for 1 hr. The completion of the reaction was confirmed by TLC analysis. After cooling, the reaction mixture was washed with water (20 mL), extracted with EtOAc (25 mL x 3). The combined organic layer was dried over anhydrous  $Na_2SO_4$ , concentrated under vacuum and purified by column chromatography (silica gel, petroleum ether:EtOAc = 7:1) to obtain the corresponding ester **22a** (2.1 g, 65% in overall two steps) as pale-yellow oil.  $^1H$  NMR (500 MHz,  $CDCl_3$ )  $\delta$  7.62-7.60 (dd,  $J = 8.5, 2$  Hz, 1H), 7.55 (s, 1H), 7.16-7.14 (d,  $J = 8.5$  Hz, 1H), 5.28 (s, 2H), 3.94 (s, 3H), 3.90 (s, 3H), 3.51 (s, 3H).  $^{13}C$  { $^1H$ } NMR (125 MHz,  $CDCl_3$ )  $\delta$  166.5, 152.9, 148.6, 123.5, 122.7, 112.0, 110.2, 94.9, 56.3, 55.8, 51.9. IR (neat,  $cm^{-1}$ ) 2987, 1721, 1606, 1520, 1442, 1277, 1224, 1141, 912, 736. HRMS (ESI-quadrupole)  $m/z$ :  $[M+H]^+$  Calculated for  $C_{11}H_{14}O_5$  226.0841; Found 226.0842.

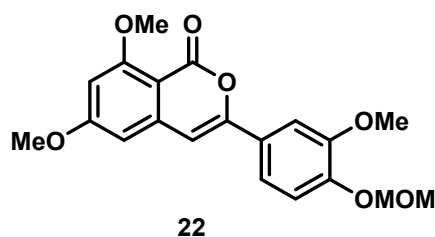

**6,8-dimethoxy-3-(3-methoxy-4-(methoxymethoxy)phenyl)-1H-isochromen-1-one,**

**(19):** Conditions A was followed for the synthesis of the isocoumarin **22**. The product **22** was obtained as pale-yellow liquid (0.147 g, 83%). <sup>1</sup>H NMR (500 MHz, CDCl<sub>3</sub>) δ 7.41-7.39 (d, *J* = 6.5 Hz, 2H), 7.21-7.19 (d, *J* = 9 Hz, 1H), 6.71 (s, 1H), 6.46 (s, 1H), 5.28 (s, 2H), 3.98 (s, 6H), 3.92 (s, 3H), 3.53 (s, 3H). <sup>13</sup>C{<sup>1</sup>H} NMR (125 MHz, CDCl<sub>3</sub>) 165.5, 163.4, 159.0, 154.3, 149.8, 148.2, 142.5, 126.3, 118.5, 115.9, 108.9, 103.2, 101.1, 100.2, 98.6, 95.3, 56.4, 56.3, 55.7. IR (neat, cm<sup>-1</sup>) 2936, 1736, 1608, 1525, 1474, 1254, 1171, 1002. HRMS (ESI-quadrupole) *m/z*: [M+H]<sup>+</sup> Calculated for C<sub>20</sub>H<sub>20</sub>O<sub>7</sub> 373.1282; Found 373.1284.

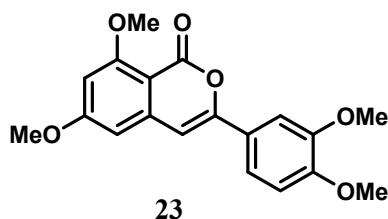

**3-(3,4-dimethoxyphenyl)-6,8-dimethoxy-1H-isochromen-1-one, (23):** Conditions A

was followed for the synthesis of the isocoumarin **23**. The product **23** was obtained as pale-yellow liquid (0.15 g, 92%). <sup>1</sup>H NMR (500 MHz, CDCl<sub>3</sub>) δ 7.47-7.46 (d, *J* = 5 Hz, 1H), 7.36 (s, 1H), 6.93-6.91 (d, *J* = 8.15 Hz, 1H), 6.69 (s, 1H), 6.45 (s, 1H), 3.98 (s, 6H), 3.94 (s, 3H), 3.92 (s, 3H); <sup>13</sup>C{<sup>1</sup>H} NMR (125 MHz, CDCl<sub>3</sub>) 165.4, 163.4, 159.0, 154.4, 150.7, 149.2, 142.6, 124.8, 118.7, 111.1, 100.8, 100.2, 98.5, 56.4, 56.2, 56.0, 55.7. IR (neat, cm<sup>-1</sup>) 2952, 1733, 1605, 1524, 1473, 1262, 1004. HRMS (ESI-quadrupole) *m/z*: [M+H]<sup>+</sup> Calculated for C<sub>19</sub>H<sub>18</sub>O<sub>6</sub> 343.1172; Found 343.1176.

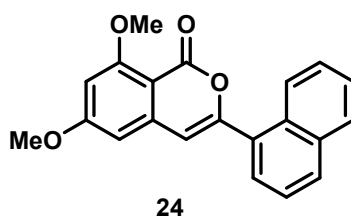

**6,8-dimethoxy-3-(naphthalen-1-yl)-1H-isochromen-1-one, (24):** Conditions A was followed for the synthesis of the isocoumarin **24**. The product **24** was obtained as white solid (0.143 g, 91%). <sup>1</sup>H NMR (500 MHz, CDCl<sub>3</sub>) δ 8.24-8.22 (d, *J* = 8 Hz, 1H), 7.90-7.85 (m, 2H), 7.72-7.71 (dd, *J* = 7.5, 1.5 Hz, 1H), 7.53-7.47 (m, 3H), 6.59 (s, 1H), 6.48-6.47 (d, *J* = 2 Hz, 1H), 6.43-6.42 (d, *J* = 2.5 Hz, 1H), 3.99 (s, 3H), 3.90 (s, 3H). <sup>13</sup>C {<sup>1</sup>H} NMR (125 MHz, CDCl<sub>3</sub>) 165.4, 163.4, 158.8, 155.6, 142.1, 133.8, 130.8, 130.7, 130.4, 128.5, 127.5, 127.0, 126.2, 125.3, 125.0, 107.1, 103.4, 100.3, 98.9, 56.2, 55.6. IR (neat, cm<sup>-1</sup>) 2952, 1732, 1605, 1464, 1371, 1223, 1135, 995. HRMS (ESI-quadrupole) *m/z*: [M+H]<sup>+</sup> Calculated for C<sub>21</sub>H<sub>16</sub>O<sub>4</sub> 333.1115; Found 333.1121. Melting point 148-150 °C.

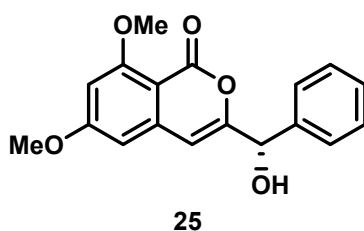

**(S)-3-(hydroxy(phenyl)methyl)-6,8-dimethoxy-1H-isochromen-1-one, (25):** Conditions A was followed for the synthesis of the isocoumarin **25**. The product **25** was obtained as pale-yellow liquid (0.093 g, 63%). <sup>1</sup>H NMR (500 MHz, CDCl<sub>3</sub>) δ 7.47-7.46 (d, *J* = 7.5 Hz, 2H), 7.40-7.34 (m, 3H), 6.45 (s, 1H), 6.36 (s, 1H), 6.32 (s, 1H), 5.52 (s, 1H), 3.95 (s, 3H), 3.87 (s, 3H). <sup>13</sup>C {<sup>1</sup>H} NMR (125 MHz, CDCl<sub>3</sub>) 165.5, 163.4, 158.2, 141.6, 139.2, 128.7, 128.6, 127.0, 103.0, 100.6, 100.0, 99.0, 72.9, 56.3, 55.7. IR (neat, cm<sup>-1</sup>) 3367, 2941, 1721, 1607, 1465, 1216, 1167, 1067. HRMS (ESI-quadrupole) *m/z*: [M+H]<sup>+</sup> Calculated for C<sub>18</sub>H<sub>16</sub>O<sub>5</sub> 313.1071; Found 313.1068.  $[\alpha]_{25}^D = +2.5$  (0.2 M in CH<sub>2</sub>Cl<sub>2</sub>).

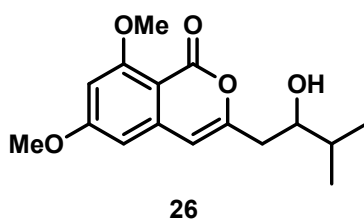

**3-(2-hydroxy-3-methylbutyl)-6,8-dimethoxy-1H-isochromen-1-one, (26):** Conditions A was followed for the synthesis of the isocoumarin **26**. The product **26** was obtained as pale-yellow liquid (48%). <sup>1</sup>H NMR (500 MHz, CDCl<sub>3</sub>) δ 6.29-6.28 (d, *J* = 2 Hz, 1H), 6.194-6.190 (d, *J* = 2 Hz, 1H), 6.09 (s, 1H), 3.87 (s, 3H), 3.80 (s, 3H), 2.60-2.57 (dd, *J* = 14.5, 2.5 Hz, 1H), 2.40-2.35 (dd, *J* = 14.5, 9.5 Hz, 1H), 1.73-1.60 (m, 1H), 0.93-0.91 (dd, *J* = 7, 2.5

Hz, 6H).  $^{13}\text{C}\{^1\text{H}\}$  NMR (125 MHz,  $\text{CDCl}_3$ ) 165.3, 163.3, 159.0, 156.6, 142.1, 105.0, 103.1, 99.5, 98.2, 73.3, 56.1, 55.4, 38.7, 33.7, 18.8, 17.3. IR (neat,  $\text{cm}^{-1}$ ) 3386, 2978, 1727, 1608, 1470, 1218, 912. HRMS (ESI-quadrupole)  $m/z$ :  $[\text{M}+\text{H}]^+$  Calculated for  $\text{C}_{16}\text{H}_{20}\text{O}_5$  265.1071; Found 265.1069.

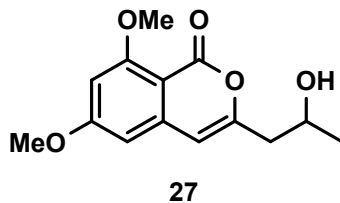

**3-(2-hydroxypropyl)-6,8-dimethoxy-1H-isochromen-1-one, (27):**<sup>10</sup> Conditions A was followed for the synthesis of the isocoumarin **27**. The product **27** was obtained as yellow liquid (0.054 g, 43%).  $^1\text{H}$  NMR (500 MHz,  $\text{CDCl}_3$ )  $\delta$  6.44 (s, 3H), 6.33 (s, 3H), 6.20 (s, 3H), 4.32-4.24 (m, 2H), 3.96 (s, 3H), 3.89 (s, 3H), 2.65-2.53 (m, 2H), 2.10-2.01 (m, 2H), 1.29-1.28 (d,  $J = 5$  Hz, 6H).  $^{13}\text{C}\{^1\text{H}\}$  NMR (125 MHz,  $\text{CDCl}_3$ ) 165.2, 163.1, 159.3, 156.0, 142.1, 105.1, 102.8, 99.5, 98.1, 65.1, 55.9, 55.4, 43.2, 23.1. IR (neat,  $\text{cm}^{-1}$ ) 3352, 2945, 1734, 1610, 1469, 1381, 1249, 1172. HRMS (ESI-quadrupole)  $m/z$ :  $[\text{M}+\text{H}]^+$  Calculated for  $\text{C}_{14}\text{H}_{16}\text{O}_5$  265.1071; Found 265.1069.

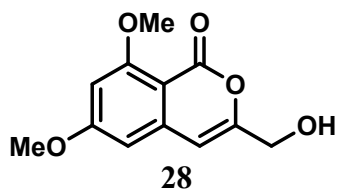

**3-(hydroxymethyl)-6,8-dimethoxy-1H-isochromen-1-one, (28):** Conditions A was followed for the synthesis of the isocoumarin **28**. The product **28** was obtained as pale-yellow liquid (0.050 g, 45%).  $^1\text{H}$  NMR (500 MHz,  $\text{CDCl}_3$ )  $\delta$  6.48-6.47 (d,  $J = 2.5$  Hz, 1H), 6.393-6.388 (d,  $J = 2.5$  Hz, 1H), 6.380 (s, 1H), 4.43 (s, 2H), 3.97 (s, 3H), 3.90 (s, 3H).  $^{13}\text{C}\{^1\text{H}\}$  NMR (125 MHz,  $\text{CDCl}_3$ ) 165.6, 163.4, 156.4, 141.7, 103.3, 102.9, 100.4, 98.8, 61.4, 56.3, 55.7. IR (neat,  $\text{cm}^{-1}$ ) 3388, 2940, 1740, 1602, 1265, 1111. HRMS (ESI-quadrupole)  $m/z$ :  $[\text{M}+\text{H}]^+$  Calculated for  $\text{C}_{18}\text{H}_{16}\text{O}_5$  267.0863; Found 267.0860.

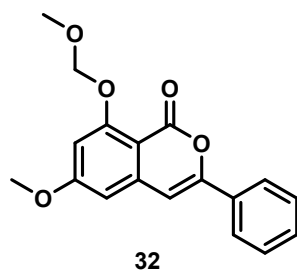

**6-methoxy-8-(methoxymethoxy)-3-phenyl-1H-isochromen-1-one, (32):** Conditions A was followed for the synthesis of the isocoumarin **32**. The product **32** was obtained as pale-yellow liquid (0.070 g, 54%).  $^1\text{H}$  NMR (500 MHz,  $\text{CDCl}_3$ )  $\delta$  7.88-7.87 (d,  $J = 7$  Hz, 2H), 7.47-7.40 (m, 3H), 6.79 (s, 1H), 6.77-6.76 (d,  $J = 2$  Hz, 1H), 6.54-6.53 (d,  $J = 2$  Hz, 1H), 5.38 (s, 2H), 3.91 (s, 3H), 3.57 (s, 3H);  $^{13}\text{C}\{^1\text{H}\}$  NMR (125 MHz,  $\text{CDCl}_3$ ) 167.5, 165.1, 161.1, 154.3, 141.9, 130.9, 130.0, 128.9, 128.8, 125.4, 104.3, 102.6, 102.3, 101.8, 95.1, 56.6, 55.6; IR (neat,  $\text{cm}^{-1}$ ) 2945, 1740, 1609, 1372, 1167. HRMS (ESI-quadrupole)  $m/z$ :  $[\text{M}+\text{H}]^+$  Calculated for  $\text{C}_{18}\text{H}_{16}\text{O}_5$  313.1071; Found 313.1065.

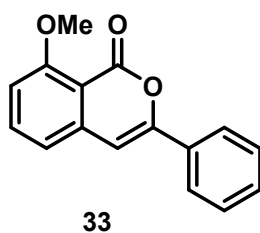

**8-methoxy-3-phenyl-1H-isochromen-1-one, (33):**<sup>7</sup> Conditions A was followed for the synthesis of the isocoumarin **33**. The product **33** was obtained as yellow liquid (0.107 g, 89%).  $^1\text{H}$  NMR (500 MHz,  $\text{CDCl}_3$ )  $\delta$  7.82-7.80 (d,  $J = 7.5$  Hz, 2H), 7.57-7.54 (t,  $J = 16, 8$  Hz, 1H), 7.40-7.35 (m, 3H), 7.04-7.03 (d,  $J = 8$  Hz, 1H), 6.95-6.94 (d,  $J = 8$  Hz, 1H), 6.86 (s, 1H), 4.02 (s, 3H).  $^{13}\text{C}\{^1\text{H}\}$  NMR (125 MHz,  $\text{CDCl}_3$ ) 161.7, 159.1, 154.0, 140.5, 135.8, 131.9, 130.0, 128.8, 125.3, 118.1, 109.9, 109.3, 101.8, 56.4. IR (neat,  $\text{cm}^{-1}$ ) 2938, 1743, 1652, 1606, 1576, 1484, 1284, 1116. HRMS (ESI-quadrupole)  $m/z$ :  $[\text{M}+\text{H}]^+$  Calculated for  $\text{C}_{16}\text{H}_{12}\text{O}_3$  253.0859; Found 253.0857.

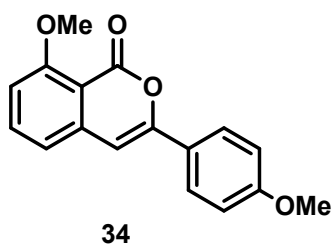

**8-methoxy-3-(4-methoxyphenyl)-1H-isochromen-1-one, (34):**<sup>11</sup> Conditions A was followed for the synthesis of the isocoumarin **34**. The product **34** was obtained as yellow liquid (0.114 g, 85%). <sup>1</sup>H NMR (500 MHz, CDCl<sub>3</sub>) δ 7.82-7.80 (d, *J* = 9 Hz, 2H), 7.60-7.57 (t, *J* = 16.8 Hz, 1H), 7.00-6.88 (m, 4H), 6.72 (s, 1H), 4.01 (s, 3H), 3.85 (s, 3H). <sup>13</sup>C{<sup>1</sup>H} NMR (125 MHz, CDCl<sub>3</sub>) 161.7, 161.1, 159.2, 154.0, 140.9, 135.7, 126.9, 124.4, 117.9, 114.2, 109.4, 108.9, 100.2, 56.3, 55.4. IR (neat, cm<sup>-1</sup>) 2951, 1726, 1610, 1467, 1219, 1169, 1061. HRMS (ESI-quadrupole) *m/z*: [M+H]<sup>+</sup> Calculated for C<sub>17</sub>H<sub>14</sub>O<sub>4</sub> 283.0964; Found 283.0968.

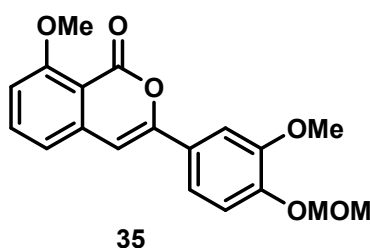

**8-methoxy-3-(3-methoxy-4-(methoxymethoxy)phenyl)-1H-isochromen-1-one, (35):** Conditions A was followed for the synthesis of the isocoumarin **35**. The product **35** was obtained as yellow solid (0.130 g, 80%). <sup>1</sup>H NMR (500 MHz, CDCl<sub>3</sub>) δ 7.61-7.57 (t, *J* = 16, 8 Hz, 1H), 7.41 (s, 1H), 7.19-7.18 (d, *J* = 9 Hz, 1H), 7.01-6.99 (d, *J* = 7.5 Hz, 1H), 6.92-6.90 (d, *J* = 8.5 Hz, 1H), 6.74 (s, 1H), 5.27 (s, 2H), 4.03 (s, 3H), 3.99 (s, 3H), 3.53 (s, 3H). <sup>13</sup>C{<sup>1</sup>H} NMR (125 MHz, CDCl<sub>3</sub>) 161.7, 159.2, 153.8, 149.8, 148.1, 140.7, 135.8, 126.2, 122.9, 122.6, 118.4, 117.9, 115.9, 109.6, 108.8, 100.9, 95.3, 56.32, 56.28, 56.21. IR (neat, cm<sup>-1</sup>) 2951, 1726, 1610, 1467, 1219, 1169, 1061. HRMS (ESI-quadrupole) *m/z*: [M+H]<sup>+</sup> Calculated for C<sub>19</sub>H<sub>18</sub>O<sub>6</sub> 343.1176; Found 343.1172.

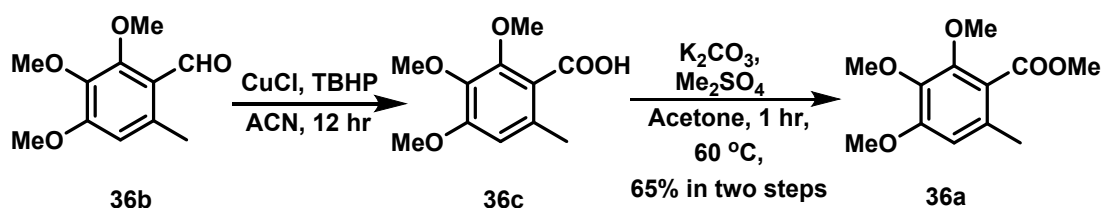

**Preparation of methyl 2,3,4-trimethoxy-6-methylbenzoate, (36a):** A similar procedure to that used for the preparation of **6** was followed to obtain the ester **36a** (2.1 g, 65% in overall two steps) as yellow oil, starting from aldehyde **36b**. <sup>1</sup>H NMR (500 MHz, CDCl<sub>3</sub>) δ 6.45 (s, 1H), 3.87(s, 6H), 3.84(s, 3H), 3.81(s, 3H), 2.25(s, 3H). <sup>13</sup>C{<sup>1</sup>H} NMR (125 MHz, CDCl<sub>3</sub>) δ 168.0, 154.3, 151.3, 140.0, 131.5, 121.4, 109.2, 61.6, 60.8, 55.9, 51.9, 19.6. IR

(neat,  $\text{cm}^{-1}$ ) 2977, 1730, 1610, 1472, 1355, 1265, 1211, 1150. HRMS (ESI-quadrupole)  $m/z$ :  $[\text{M}+\text{H}]^+$  Calculated for  $\text{C}_{12}\text{H}_{16}\text{O}_5$  241.1071; Found 241.1072.

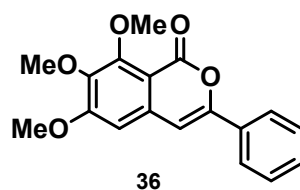

**6,7,8-trimethoxy-3-phenyl-1H-isochromen-1-one, (36):**<sup>12</sup> Conditions A was followed for the synthesis of the isocoumarin **36**. The product **36** was obtained as yellow liquid (0.136 g, 93%).  $^1\text{H}$  NMR (500 MHz,  $\text{CDCl}_3$ )  $\delta$  7.85-7.84 (d,  $J = 7.5$  Hz, 2H), 7.45-7.40 (m, 3H), 6.81 (s, 1H), 6.69 (s, 1H), 4.01 (s, 3H), 3.98 (s, 3H), 3.92 (s, 3H).  $^{13}\text{C}\{^1\text{H}\}$  NMR (125 MHz,  $\text{CDCl}_3$ ) 159.1, 158.6, 155.7, 153.3, 142.8, 136.2, 131.8, 129.8, 128.7, 125.1, 108.0, 103.3, 101.5, 61.9, 61.4, 56.2. IR (neat,  $\text{cm}^{-1}$ ) 2952, 1734, 1600, 1498, 1345, 1261, 1117, 1002. HRMS (ESI-quadrupole)  $m/z$ :  $[\text{M}+\text{H}]^+$  Calculated for  $\text{C}_{18}\text{H}_{16}\text{O}_5$  313.1071; Found 313.1068.

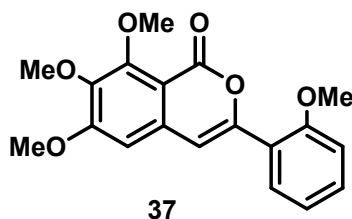

**6,7,8-trimethoxy-3-(2-methoxyphenyl)-1H-isochromen-1-one, (37):** Conditions A was followed for the synthesis of the isocoumarin **37**. The product **37** was obtained as yellow liquid (0.143 g, 88%).  $^1\text{H}$  NMR (500 MHz,  $\text{CDCl}_3$ )  $\delta$  8.00-7.98 (dd,  $J = 7.5, 1.5$  Hz, 1H), 7.38-7.34 (t,  $J = 14, 7$  Hz, 1H), 7.24 (s, 1H), 7.08-7.05 (t,  $J = 15, 7.5$  Hz, 1H), 7.00-6.98 (d,  $J = 8.5$  Hz, 1H), 6.67 (s, 1H), 4.02 (s, 3H), 3.99 (s, 3H), 3.97 (s, 3H), 3.93 (s, 3H).  $^{13}\text{C}\{^1\text{H}\}$  NMR (125 MHz,  $\text{CDCl}_3$ ) 158.9, 158.6, 157.2, 155.7, 150.2, 142.8, 136.8, 130.6, 128.9, 121.0, 120.7, 111.3, 108.4, 106.7, 103.6, 61.9, 61.4, 56.1, 55.6. IR (neat,  $\text{cm}^{-1}$ ) 2946, 1732, 1598, 1499, 1375, 1261, 1116, 912. HRMS (ESI-quadrupole)  $m/z$ :  $[\text{M}+\text{H}]^+$  Calculated for  $\text{C}_{19}\text{H}_{18}\text{O}_6$  343.1176; Found 343.1172.

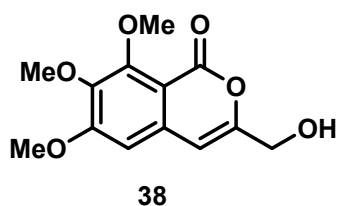



**3-(hydroxymethyl)-6,7,8-trimethoxy-1H-isochromen-1-one, (38):** Conditions A was followed for the synthesis of the isocoumarin **38**. The product **38** was obtained as yellow liquid (0.062 g, 49%). <sup>1</sup>H NMR (500 MHz, CDCl<sub>3</sub>) δ 6.57 (s, 1H), 6.36 (s, 1H), 4.43 (s, 2H), 3.98 (s, 3H), 3.96 (s, 3H), 3.90 (s, 3H). <sup>13</sup>C{<sup>1</sup>H} NMR (125 MHz, CDCl<sub>3</sub>) 167.4, 159.3, 158.3, 156.0, 155.7, 143.0, 135.7, 108.2, 103.1, 102.4, 61.9, 61.3, 56.1. IR (neat, cm<sup>-1</sup>) 3296, 2945, 1736, 1655, 1452, 1404, 1293, 1117. HRMS (ESI-quadrupole) m/z: [M+H]<sup>+</sup> Calculated for C<sub>13</sub>H<sub>14</sub>O<sub>6</sub> 267.0863; Found 267.0860.

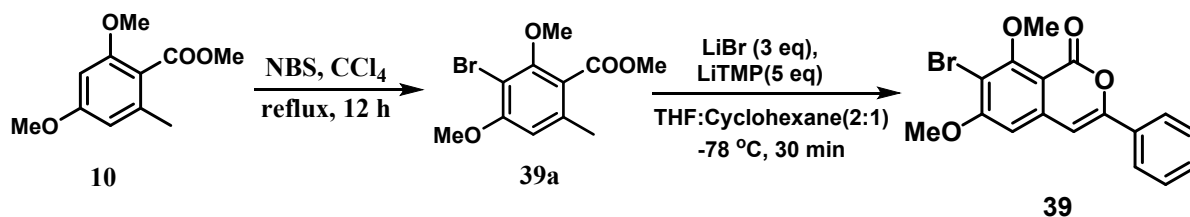

**Preparation of methyl-3-bromo-2,4-dimethoxy-6-methylbenzoate, (39a):**<sup>2</sup> To a stirred solution of ester **10**<sup>1</sup> (0.11 g, 0.52 mmol) in CCl<sub>4</sub> (2 mL), was added NBS (0.103 g, 0.58 mmol). The reaction mixture was refluxed for 12 hr. The completion of the reaction was confirmed by TLC. The reaction mixture was washed with H<sub>2</sub>O (20 mL), extracted with EtOAc (30 mL x 3). The combined organic layer was washed with brine, dried over anhydrous Na<sub>2</sub>SO<sub>4</sub>, concentrated under vacuum and purified by column chromatography (silica gel, petroleum ether:EtOAc = 7:1) to obtain the corresponding ester **39a** (0.086 g, 57%) as yellow oil. <sup>1</sup>H NMR (500 MHz, CDCl<sub>3</sub>+ CCl<sub>4</sub>) δ 6.35 (s, 1H), 3.89 (s, 3H), 3.88 (s, 3H), 3.82 (s, 3H), 2.32 (s, 3H). <sup>13</sup>C{<sup>1</sup>H} NMR (125 MHz, CDCl<sub>3</sub>+CCl<sub>4</sub>) δ 168.1, 157.3, 156.5, 137.0, 117.7, 105.7, 93.9, 56.3, 56.1, 52.3, 20.5. IR (neat cm<sup>-1</sup>) 2968, 1733, 1604, 1443, 1285, 1118, 1021. HRMS (ESI-quadrupole) m/z: [M+H]<sup>+</sup> Calculated for C<sub>11</sub>H<sub>13</sub>BrO<sub>4</sub> 289.0070, 291.0050; Found 289.0065, 291.0047.

**7-bromo-6,8-dimethoxy-3-phenyl-1H-isochromen-1-one, (39):** Conditions A was followed for the synthesis of the isocoumarin **39**. The product **39** was obtained as white solid (0.152 g, 89%). <sup>1</sup>H NMR (500 MHz, CDCl<sub>3</sub>) δ 7.93-7.92 (d, *J* = 6.5 Hz, 2H), 7.48-7.43 (m, 3H), 7.31 (s, 1H), 6.50 (s, 1H), 4.04 (s, 3H), 4.01 (s, 3H). <sup>13</sup>C{<sup>1</sup>H} NMR (125 MHz, CDCl<sub>3</sub>) 163.1, 161.4, 158.0, 155.1, 140.0, 131.9, 130.3, 128.8, 125.7, 104.0, 100.6, 99.4, 94.8, 56.4. IR (neat, cm<sup>-1</sup>) 2964, 1730, 1650, 1591, 1457, 1338, 1227, 1011. HRMS (ESI-quadrupole) m/z: [M+H]<sup>+</sup> Calculated for C<sub>17</sub>H<sub>13</sub>BrO<sub>4</sub> 361.0070, 363.0050; Found 361.0067, 363.0045. Melting point 195-197 °C.

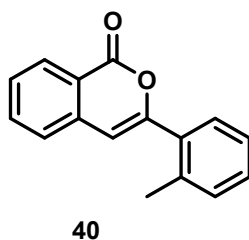

**3-(o-tolyl)-1H-isochromen-1-one, (40):**<sup>6</sup> Conditions A was followed for the synthesis of the isocoumarin **40**. The product **40** was obtained as pale-yellow liquid (0.073 g, 65%). <sup>1</sup>H NMR (500 MHz, CDCl<sub>3</sub>) δ 8.39-8.37 (d, *J* = 7.5 Hz, 1H), 7.80-7.77 (t, *J* = 14, 7 Hz, 1H), 7.59-7.52 (m, 3H), 7.41-7.39 (t, *J* = 13, 6.5 Hz, 1H), 7.34-7.32 (d, *J* = 7.5 Hz, 2H), 6.66 (s, 1H), 2.56 (s, 3H). <sup>13</sup>C{<sup>1</sup>H} NMR (125 MHz, CDCl<sub>3</sub>) 162.6, 155.6, 137.5, 136.8, 134.9, 132.8, 131.1, 129.8, 129.7, 129.2, 128.3, 126.0, 125.8, 120.4, 105.9, 20.8. IR (neat, cm<sup>-1</sup>) 2964, 1728, 1611, 1469, 1284, 1161, 1102. HRMS (ESI-quadrupole) *m/z*: [M+H]<sup>+</sup> Calculated for C<sub>16</sub>H<sub>12</sub>O<sub>2</sub> 237.0921; Found 237.0916.

### Preparation of (*S*)-lunatinin:

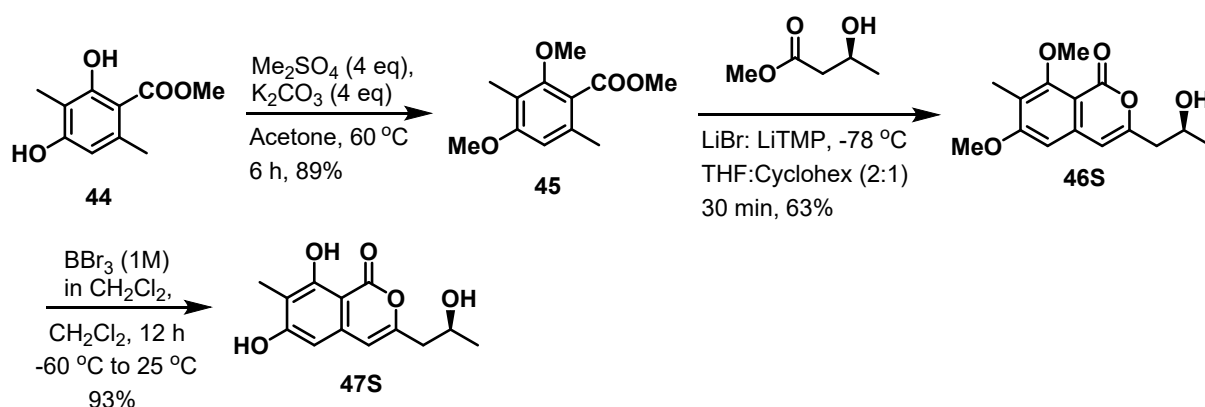

**Preparation of methyl 2,4-dimethoxy-3,6-dimethylbenzoate, (45):**<sup>5</sup> To a stirred suspension of methyl 2,4-dihydroxy-3,6-dimethylbenzoate **44** (2 g, 11 mmol) and K<sub>2</sub>CO<sub>3</sub> (6 g, 44 mmol) in acetone (30 mL), was added Me<sub>2</sub>SO<sub>4</sub> (4.0 mL, 44 mmol). The reaction mixture was heated at 60 °C for 1 hr. The completion of the reaction was confirmed by TLC analysis. After cooling, the reaction mixture was washed with water (20 mL), extracted with EtOAc (25 mL x 3). The combined organic layer was dried over anhydrous Na<sub>2</sub>SO<sub>4</sub>, concentrated under vacuum and purified by column chromatography (silica gel, petroleum ether:EtOAc = 7:1) to obtain the corresponding ester **45** (1.85 g, 81% yield). <sup>1</sup>H NMR (500 MHz, CDCl<sub>3</sub>) δ 6.42 (s, 1H), 3.89 (s, 3H), 3.82 (s, 3H), 3.74 (s, 3H), 2.29 (s,

3H), 2.09 (s, 3H).  $^{13}\text{C}\{^1\text{H}\}$  NMR (125 MHz,  $\text{CDCl}_3$ )  $\delta$  168.7, 159.3, 156.8, 134.6, 120.8, 117.2, 107.7, 61.7, 55.5, 51.9, 19.9, 8.8. IR (neat,  $\text{cm}^{-1}$ ) 2964, 1732, 1587, 1464, 1327, 1156, 1011, 913. HRMS (ESI-quadrupole)  $m/z$ :  $[\text{M}+\text{H}]^+$  Calculated for  $\text{C}_{12}\text{H}_{16}\text{O}_4$  224.1048; Found 224.1045.

**(S)-3-(2-hydroxypropyl)-6,8-dimethoxy-7-methyl-1H-isochromen-1-one (46S):**

Conditions A was followed for the synthesis of the isocoumarin **46S**. The product **46S** was obtained as light-yellow solid (0.072 g, 63%, recrystallized with EtOAc).  $[\alpha]_{25}^D = +27.0$ ;  $^1\text{H}$  NMR (500 MHz,  $\text{CDCl}_3$ )  $\delta$  6.42 (s, 1H), 6.17 (s, 1H), 4.31-4.25(m, 1H), 3.89 (s, 3H), 3.81 (s, 3H), 2.62-2.50 (m, 2H), 2.15 (s, 3H), 1.29-1.28 (d,  $J = 6$  Hz, 3H).  $^{13}\text{C}\{^1\text{H}\}$  NMR (125 MHz,  $\text{CDCl}_3$ ) 163.6, 160.8, 159.0, 155.1, 139.0, 121.3, 107.0, 105.0, 101.2, 65.3, 61.3, 55.7, 43.3, 23.3, 8.8. IR (neat,  $\text{cm}^{-1}$ ) 3364, 2946, 1727, 1606, 1465, 1245, 1120, 999. HRMS (ESI-quadrupole)  $m/z$ :  $[\text{M}+\text{H}]^+$  Calculated for  $\text{C}_{15}\text{H}_{18}\text{O}_5$  279.1227; Found 279.1229.

**(S)-lunatinin, (47S):**<sup>13</sup> To a stirred solution of compound **47S** (0.07 mg, 0.062 mmol) in  $\text{CH}_2\text{Cl}_2$  (2 mL) was added  $\text{BBr}_3$  (1 mL, 1M in  $\text{CH}_2\text{Cl}_2$ ) at  $-60$  °C dropwise manner. The reaction mixture was slowly warmed to room temperature and stirred for 12 h. The completion of the reaction was monitored by TLC analysis. The reaction mixture was poured quickly into pre cooled saturated solution (10 mL) of sodium bicarbonate. The compound was extracted with EtOAc (3 x 15 mL) until there is no product in aqueous layer. Combined organic phase is dried with sodium sulphate and the solvents removed in vacuo. The crude product is purified by a short pad of silica gel column chromatography (30% EtOAc/Pet ether) to obtain lunatinin **47S** (0.058 g, 93%) as white solid. Melting point =  $167$ - $168$  °C;  $[\alpha]_{25}^D = -19.3$  (c 0.3 MeOH);  $^1\text{H}$  NMR (500 MHz,  $\text{CDCl}_3$ )  $\delta$  11.27 (s, 1H), 6.30 (s, 1H), 6.21 (s, 1H), 4.48-4.43 (m, 1H), 3.00-2.90 (m, 2H), 2.17 (s, 3H), 1.81-1.79 (d, 3H).  $^{13}\text{C}\{^1\text{H}\}$  NMR (125 MHz,  $\text{CDCl}_3$ ) 166.2, 161.49, 161.46, 152.9, 136.0, 110.8, 106.2, 102.0, 99.9, 45.2, 44.9, 26.2, 7.8. IR (neat,  $\text{cm}^{-1}$ ) 3384, 2944, 1730, 1690, 1446, 1271, 1120. HRMS (APCI)  $m/z$ :  $[\text{M}+\text{H}]^+$  Calculated for  $\text{C}_{13}\text{H}_{14}\text{O}_5$  251.0914; Found 251.0912.

**XRD Data of (*S*)-3-(2-hydroxypropyl)-6,8-dimethoxy-7-methyl-1H-isochromen-1-one, 45S:**

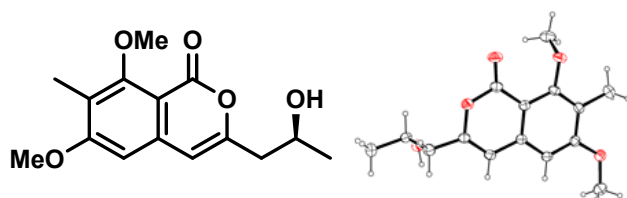

Table 1. Crystal data and structure refinement for (*S*)-3-(2-hydroxypropyl)-6,8-dimethoxy-7-methyl-1H-isochromen-1-one, 3.

|                                 |                                                |          |
|---------------------------------|------------------------------------------------|----------|
| Identification code             | shelx                                          |          |
| Empirical formula               | C <sub>15</sub> H <sub>18</sub> O <sub>5</sub> |          |
| Formula weight                  | 278.29                                         |          |
| Temperature                     | 296(2) K                                       |          |
| Wavelength                      | 0.71073 Å                                      |          |
| Crystal system                  | Orthorhombic                                   |          |
| Space group                     | P 21 21 21                                     |          |
| Unit cell dimensions            | a = 7.4075(3) Å                                | a = 90°. |
|                                 | b = 10.2397(5) Å                               | b = 90°. |
|                                 | c = 18.5058(9) Å                               | g = 90°. |
| Volume                          | 1403.68(11) Å <sup>3</sup>                     |          |
| Z                               | 4                                              |          |
| Density (calculated)            | 1.317 Mg/m <sup>3</sup>                        |          |
| Absorption coefficient          | 0.099 mm <sup>-1</sup>                         |          |
| F(000)                          | 592                                            |          |
| Crystal size                    | 0.095 x 0.078 x 0.068 mm <sup>3</sup>          |          |
| Theta range for data collection | 2.201 to 24.995°.                              |          |
| Index ranges                    | -8<=h<=8, -12<=k<=12, -22<=l<=22               |          |
| Reflections collected           | 33358                                          |          |

|                                   |                                             |
|-----------------------------------|---------------------------------------------|
| Independent reflections           | 2464 [R(int) = 0.0894]                      |
| Completeness to theta = 24.995°   | 100.0 %                                     |
| Absorption correction             | Semi-empirical from equivalents             |
| Max. and min. transmission        | 0.997 and 0.994                             |
| Refinement method                 | Full-matrix least-squares on F <sup>2</sup> |
| Data / restraints / parameters    | 2464 / 0 / 187                              |
| Goodness-of-fit on F <sup>2</sup> | 1.098                                       |
| Final R indices [I>2sigma(I)]     | R1 = 0.0429, wR2 = 0.0961                   |
| R indices (all data)              | R1 = 0.0519, wR2 = 0.0978                   |
| Absolute structure parameter      | 0.4(4)                                      |
| Extinction coefficient            | 0.047(6)                                    |
| Largest diff. peak and hole       | 0.220 and -0.234 e.Å <sup>-3</sup>          |

Table 2. Atomic coordinates ( $\times 10^4$ ) and equivalent isotropic displacement parameters ( $\text{\AA}^2 \times 10^3$ )

for lunatinin\_s. U(eq) is defined as one third of the trace of the orthogonalized U<sup>ij</sup> tensor.

|       | x        | y       | z       | U(eq) |
|-------|----------|---------|---------|-------|
| C(1)  | 7541(3)  | 5321(3) | 5429(1) | 47(1) |
| C(2)  | 5762(3)  | 5412(3) | 5167(1) | 48(1) |
| C(3)  | 5257(3)  | 4619(3) | 4599(2) | 47(1) |
| C(4)  | 6500(3)  | 3767(3) | 4257(1) | 43(1) |
| C(5)  | 8281(3)  | 3733(2) | 4521(1) | 41(1) |
| C(6)  | 8779(3)  | 4501(3) | 5111(1) | 45(1) |
| C(7)  | 9580(3)  | 2914(3) | 4152(1) | 47(1) |
| C(8)  | 9113(3)  | 2208(3) | 3585(1) | 46(1) |
| C(9)  | 6007(3)  | 2954(3) | 3642(2) | 51(1) |
| C(10) | 10285(4) | 1385(3) | 3126(2) | 54(1) |
| C(11) | 10688(3) | 1967(3) | 2389(1) | 51(1) |
| C(12) | 11863(4) | 1072(3) | 1951(2) | 70(1) |
| C(13) | 9588(4)  | 5954(4) | 6366(2) | 78(1) |
| C(14) | 4436(4)  | 6340(3) | 5516(2) | 73(1) |
| C(15) | 3018(4)  | 5461(3) | 3807(2) | 74(1) |
| O(1)  | 7893(2)  | 6085(2) | 6009(1) | 62(1) |
| O(2)  | 3468(2)  | 4617(2) | 4395(1) | 61(1) |
| O(3)  | 4549(2)  | 2841(2) | 3363(1) | 76(1) |
| O(4)  | 7351(2)  | 2220(2) | 3338(1) | 56(1) |
| O(5)  | 11462(2) | 3240(2) | 2445(1) | 62(1) |

**XRD Data of (R)-3-(2-hydroxypropyl)-6,8-dimethoxy-7-methyl-1H-isochromen-1-one, 43R:**

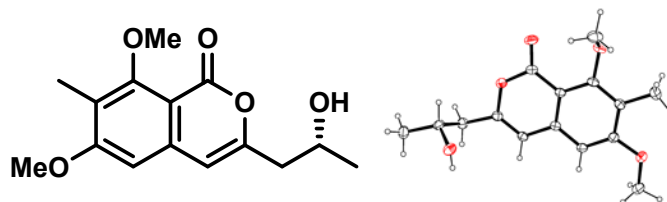

Table 1. Crystal data and structure refinement for (R)-3-(2-hydroxypropyl)-6,8-dimethoxy-7-methyl-1H-isochromen-1-one, 4.

|                                   |                                                |          |
|-----------------------------------|------------------------------------------------|----------|
| Identification code               | shelx                                          |          |
| Empirical formula                 | C <sub>15</sub> H <sub>18</sub> O <sub>5</sub> |          |
| Formula weight                    | 278.29                                         |          |
| Temperature                       | 293(2) K                                       |          |
| Wavelength                        | 0.71073 Å                                      |          |
| Crystal system                    | Orthorhombic                                   |          |
| Space group                       | P 21 21 21                                     |          |
| Unit cell dimensions              | a = 7.3959(5) Å                                | a = 90°. |
|                                   | b = 10.1952(7) Å                               | b = 90°. |
|                                   | c = 18.4363(13) Å                              | g = 90°. |
| Volume                            | 1390.15(17) Å <sup>3</sup>                     |          |
| Z                                 | 4                                              |          |
| Density (calculated)              | 1.330 Mg/m <sup>3</sup>                        |          |
| Absorption coefficient            | 0.100 mm <sup>-1</sup>                         |          |
| F(000)                            | 592                                            |          |
| Crystal size                      | 0.095 x 0.085 x 0.075 mm <sup>3</sup>          |          |
| Theta range for data collection   | 2.283 to 25.000°.                              |          |
| Index ranges                      | -8<=h<=8, -12<=k<=12, -20<=l<=21               |          |
| Reflections collected             | 15831                                          |          |
| Independent reflections           | 2441 [R(int) = 0.0365]                         |          |
| Completeness to theta = 25.000°   | 99.9 %                                         |          |
| Absorption correction             | Semi-empirical from equivalents                |          |
| Max. and min. transmission        | 0.993 and 0.991                                |          |
| Refinement method                 | Full-matrix least-squares on F <sup>2</sup>    |          |
| Data / restraints / parameters    | 2441 / 0 / 182                                 |          |
| Goodness-of-fit on F <sup>2</sup> | 1.057                                          |          |
| Final R indices [I>2sigma(I)]     | R1 = 0.0373, wR2 = 0.0991                      |          |

|                              |                                    |
|------------------------------|------------------------------------|
| R indices (all data)         | R1 = 0.0472, wR2 = 0.1061          |
| Absolute structure parameter | 0.2(5)                             |
| Extinction coefficient       | n/a                                |
| Largest diff. peak and hole  | 0.229 and -0.136 e.Å <sup>-3</sup> |

Table 2. Atomic coordinates ( $\times 10^4$ ) and equivalent isotropic displacement parameters ( $\text{Å}^2 \times 10^3$ )

for lunatinin.  $U(\text{eq})$  is defined as one third of the trace of the orthogonalized  $U_{ij}$  tensor.

|       | x        | y       | z       | U(eq) |
|-------|----------|---------|---------|-------|
| C(1)  | 4244(4)  | 5416(3) | 5167(2) | 41(1) |
| C(2)  | 4749(4)  | 4617(3) | 4601(2) | 39(1) |
| C(3)  | 3500(4)  | 3764(3) | 4261(2) | 35(1) |
| C(4)  | 1720(4)  | 3726(3) | 4520(1) | 34(1) |
| C(5)  | 1218(4)  | 4502(3) | 5107(2) | 39(1) |
| C(6)  | 2461(4)  | 5323(3) | 5424(2) | 41(1) |
| C(7)  | 4001(4)  | 2950(3) | 3645(2) | 42(1) |
| C(8)  | 889(4)   | 2198(3) | 3585(2) | 40(1) |
| C(9)  | 423(4)   | 2909(3) | 4156(2) | 38(1) |
| C(10) | 412(5)   | 5966(4) | 6362(2) | 66(1) |
| C(11) | 5562(5)  | 6335(4) | 5518(2) | 62(1) |
| C(12) | 6980(5)  | 5460(4) | 3814(2) | 65(1) |
| C(13) | -285(4)  | 1378(3) | 3123(2) | 45(1) |
| C(14) | -681(4)  | 1965(3) | 2383(2) | 43(1) |
| C(15) | -1868(5) | 1061(3) | 1946(2) | 59(1) |
| O(1)  | 2107(3)  | 6094(2) | 6012(1) | 53(1) |
| O(2)  | 6536(3)  | 4610(2) | 4399(1) | 51(1) |
| O(3)  | 5460(3)  | 2834(3) | 3366(1) | 68(1) |
| O(4)  | 2655(3)  | 2205(2) | 3338(1) | 47(1) |
| O(5)  | -1458(3) | 3236(2) | 2444(1) | 54(1) |

## References:

1. Ranganayukulu, S.; Shyam, A.; Goreti, R. *Asian J. Org. Chem.* **2022**, *11*, e202100668.
2. Assignee: Resverlogix Corp. World Intellectual Property Organization, WO2008092231 A1 2008-08-07.
3. Gadakh, S.K.; Sudalai, A. *RSC Advances* **2014**, *4(101)*, 57658-57661.
4. Senthilmurugan, A.; Aidhen, I. S. *European Journal Org. Chem.* **2010**, *3*, 555-564.
5. Assignee: Guizhou College of Traditional Chinese Medicine China, CN116640062 A 2023-08-25.
6. Hauser, F.M.; Rhee, R.P.; Prasanna, S.; Weinreb, S. M.; Dodd, J. H. *Synthesis*, **1980**, 72.
7. Lewis, C. N.; Spargo, P. L.; Staunton, J. *Synthesis*. **1986**, 944.
8. Finnie, Alistair A.; Hill, Robert A. *Journal of Chemical Research, Synopses* **1987**, *3*, 78.
9. Saeed, A. *J. Asian Nat. Prod. Res.* **2006**, *8*, 417-423.
10. Ichihara, A.; Hashimoto, M.; Hirai, T.; Takeda, I.; Sasamura, Y.; Sakamura, S.; Sato, R.; Tajimi, A. *Chemistry Letters* **1989**, *8*, 1495-8.
11. Nozawa, K.; Yamada, M.; Tsuda, Y.; Kawai, K.; Nakajima, S. *Chem. Pharm. Bull.*, **1981**, *29*, 2491-2495.
12. Saeed, A. *J. Asian Nat. Prod. Res.* **2010**, *12*, 88-93.
13. Promsuk, G.; Chuawong, P.; Songjanthuek, P.; Thaisri, S.; Yongsmith, B.; Wattana-Amorn, P. *Nat. Prod. Research* **2023**, *37(13)*, 2181-2188.



## Spectral Data:

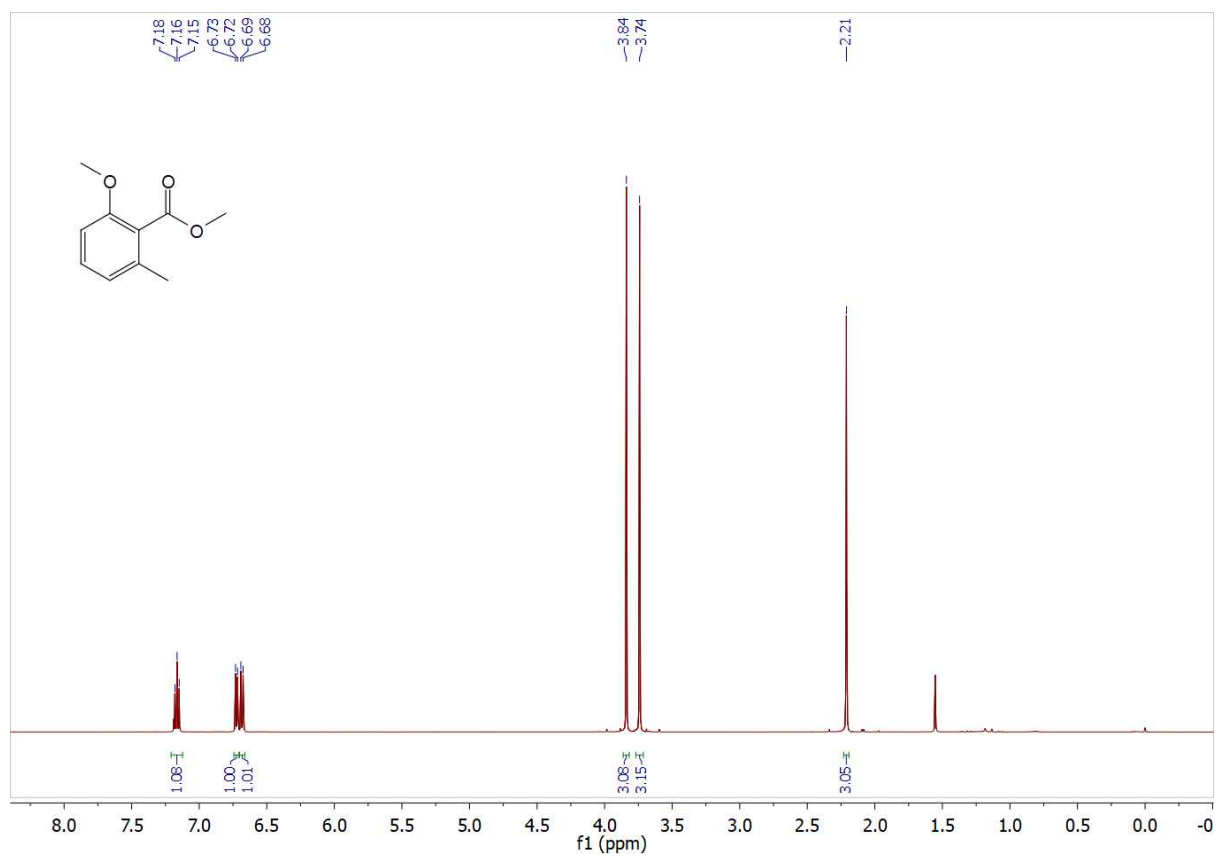

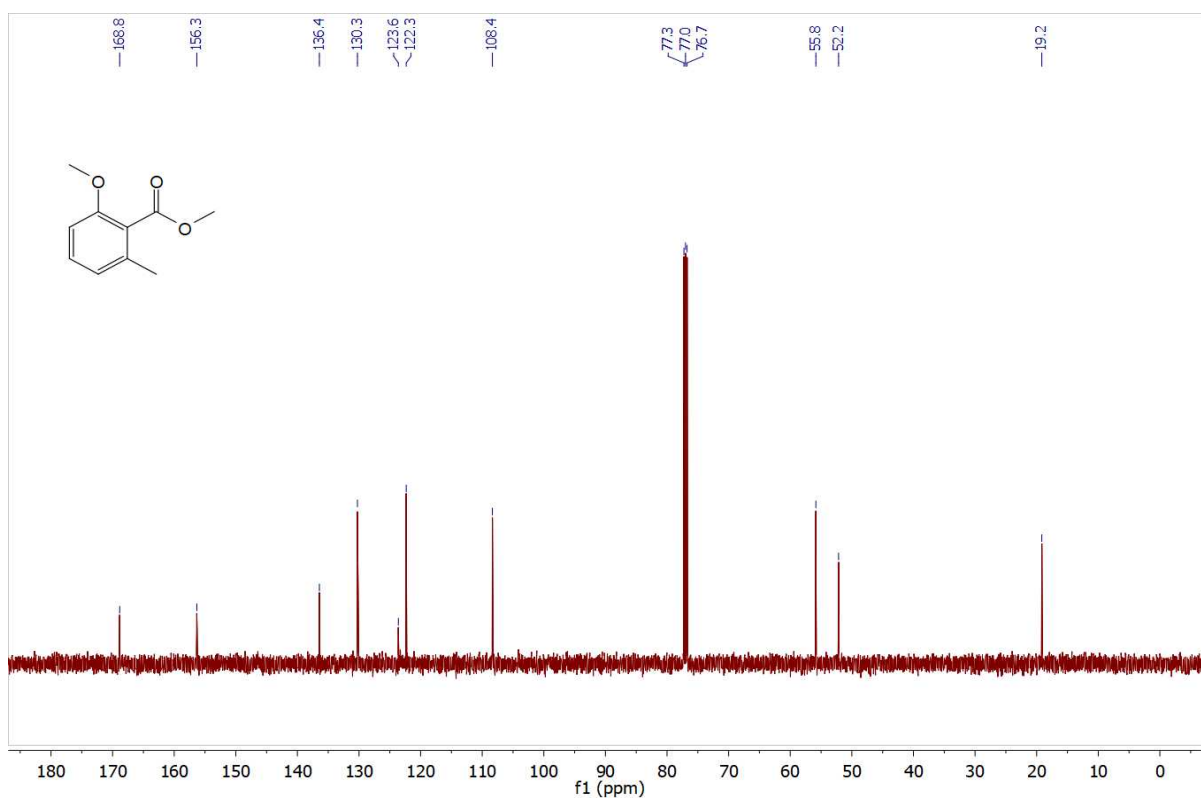

$^{13}\text{C}\{\text{H}\}$  NMR of compound 6

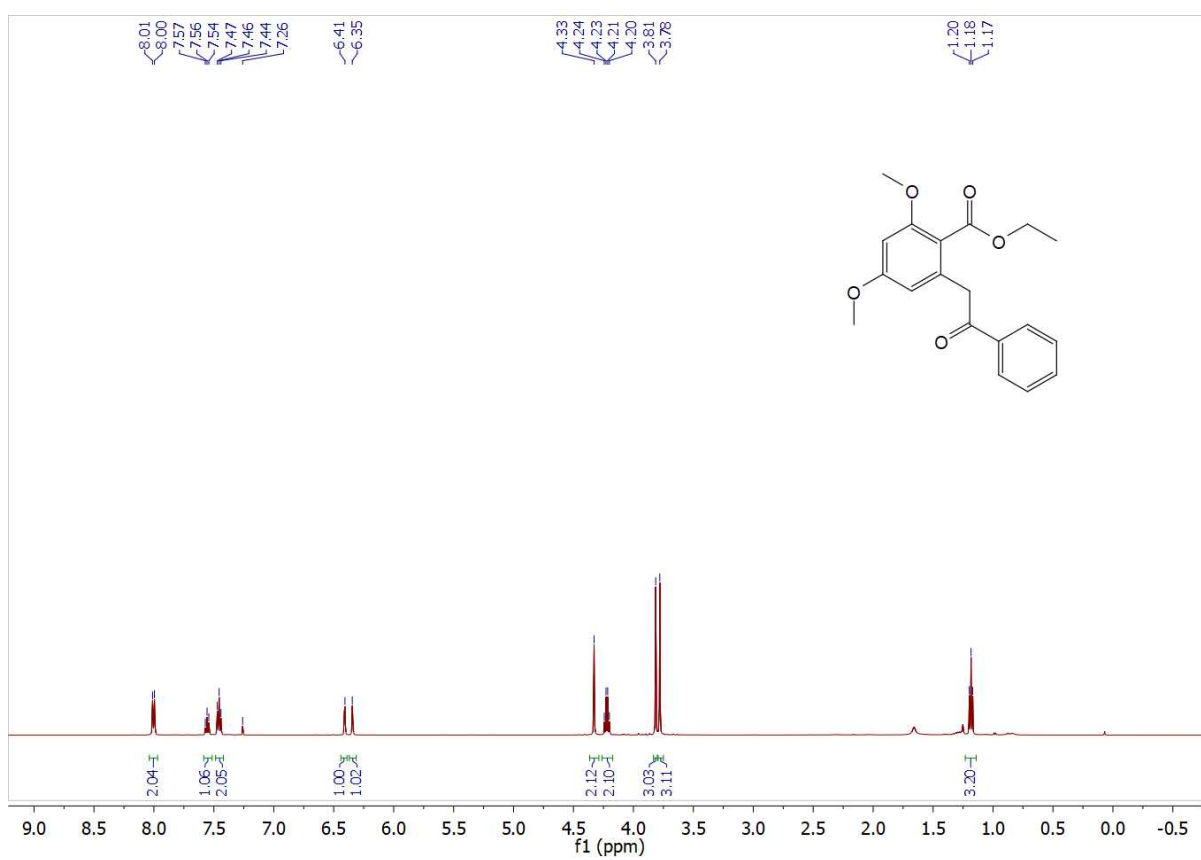

$^1\text{H}$  NMR of compound 11

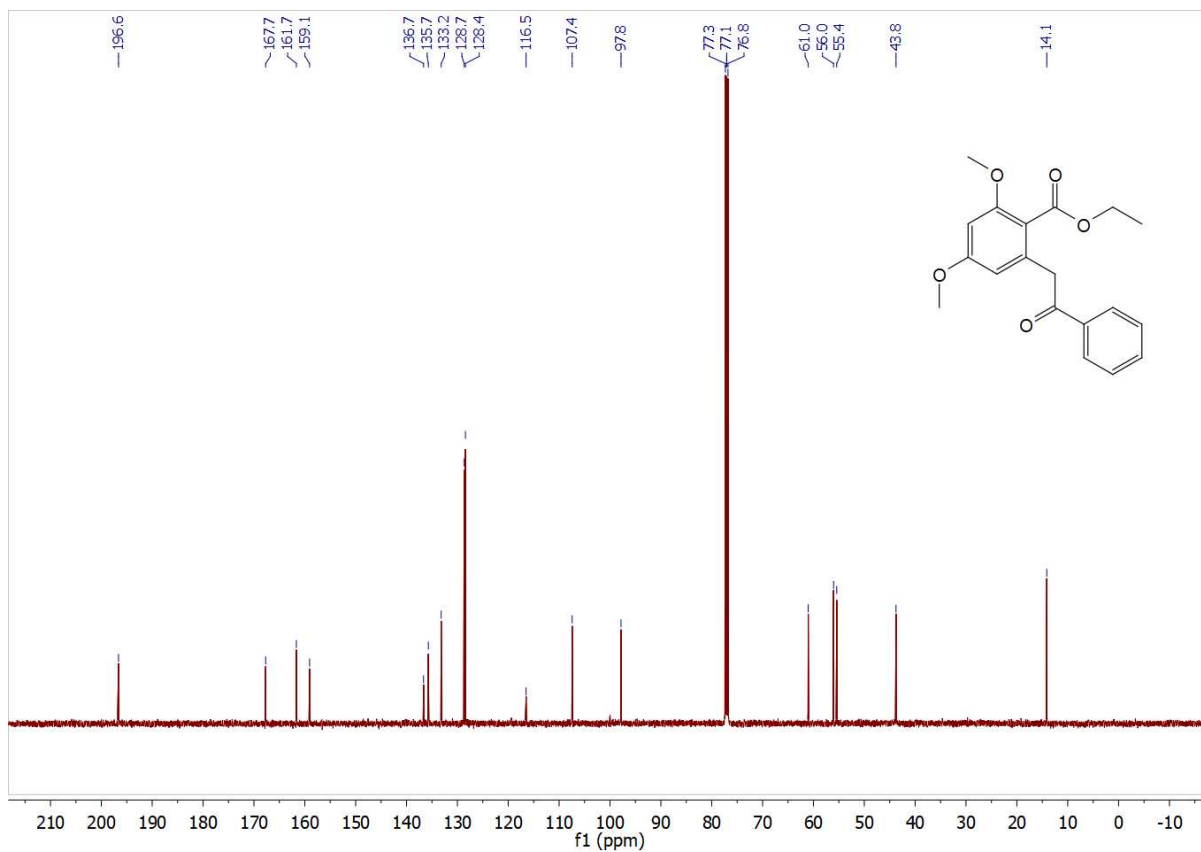

**$^{13}\text{C}\{\text{H}\}$  NMR of compound 11**

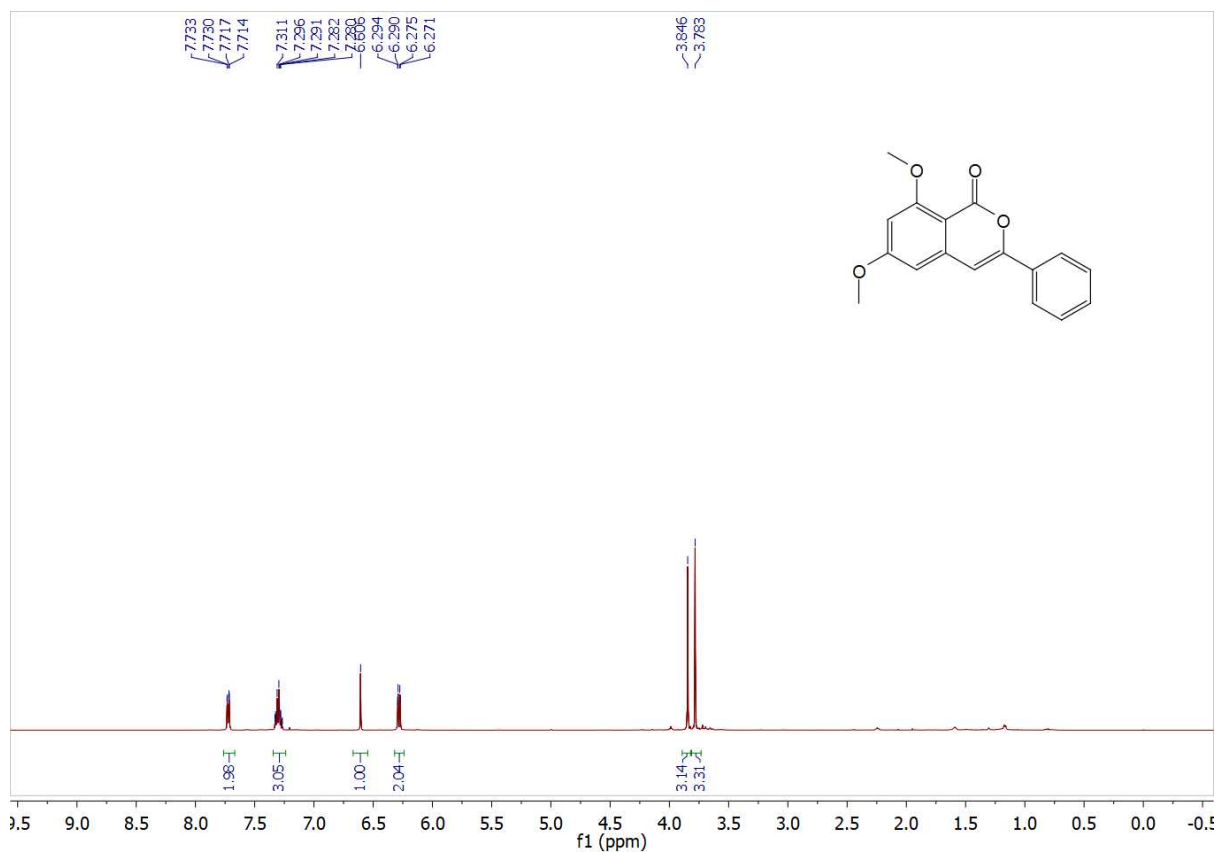

$^1\text{H}$  NMR of compound 12

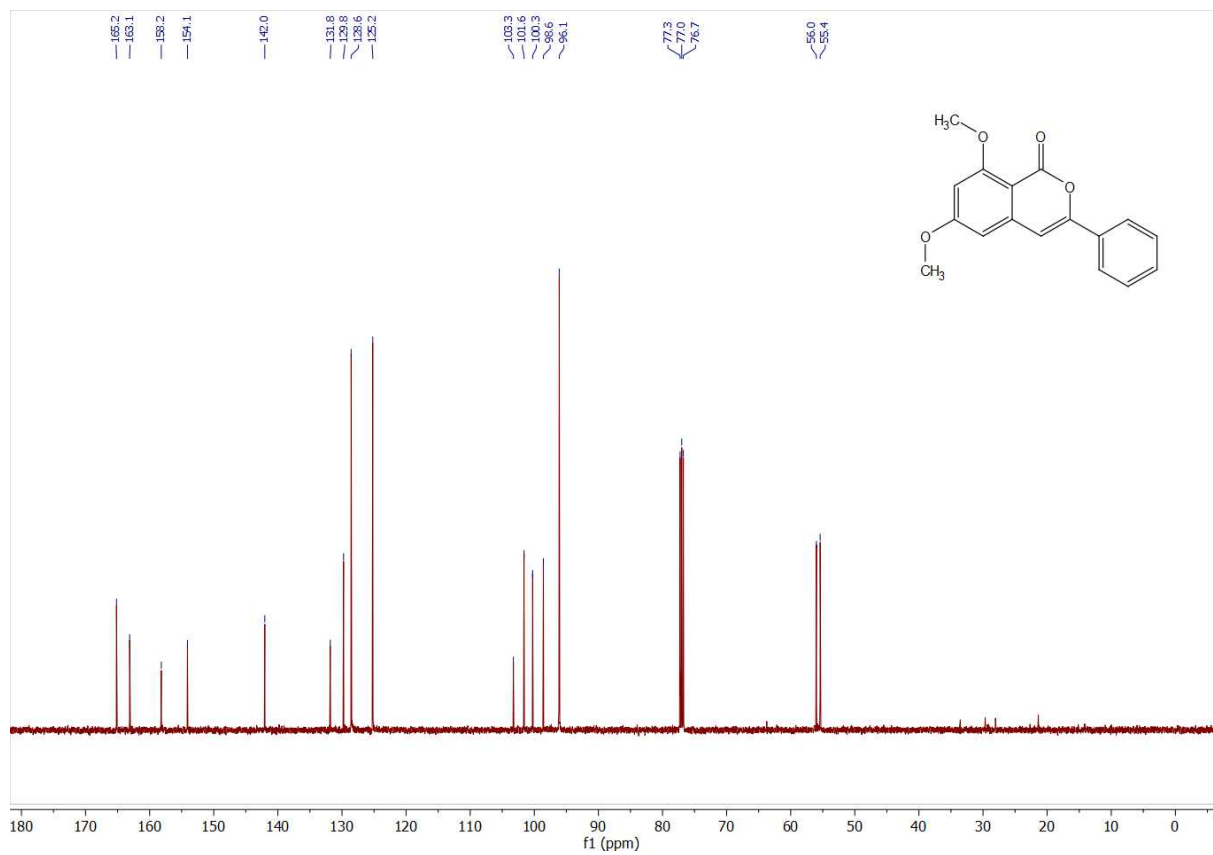

$^{13}\text{C}\{\text{H}\}$  NMR of compound 12

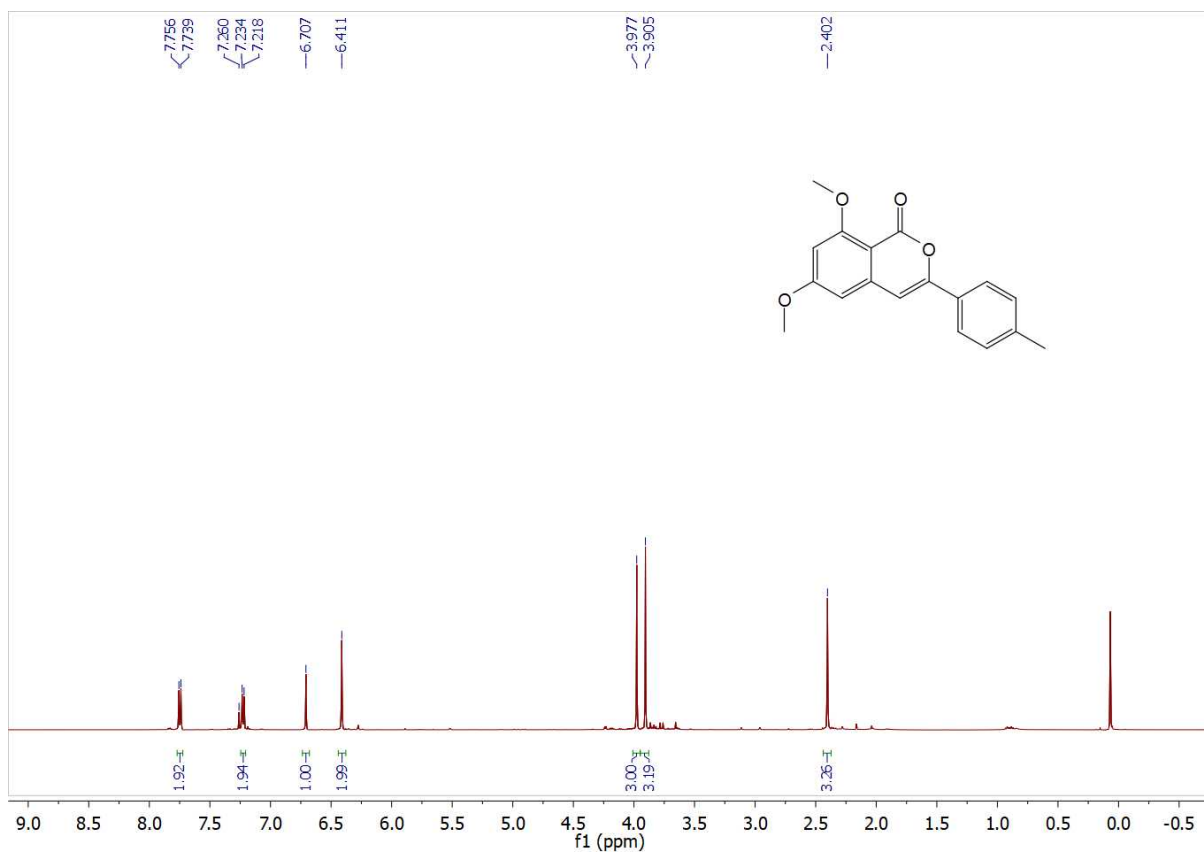

**<sup>1</sup>H NMR of compound 14**

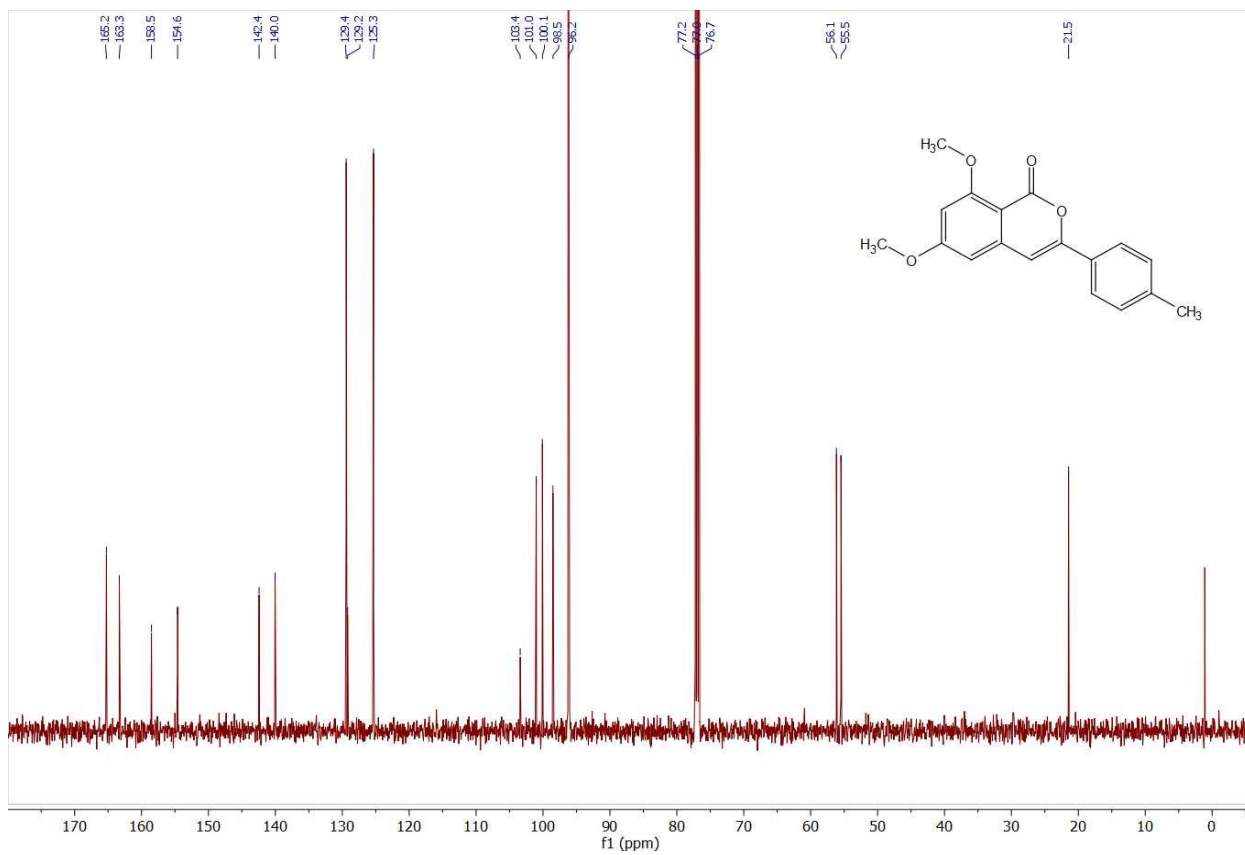

**<sup>13</sup>C{H} NMR of compound 14**

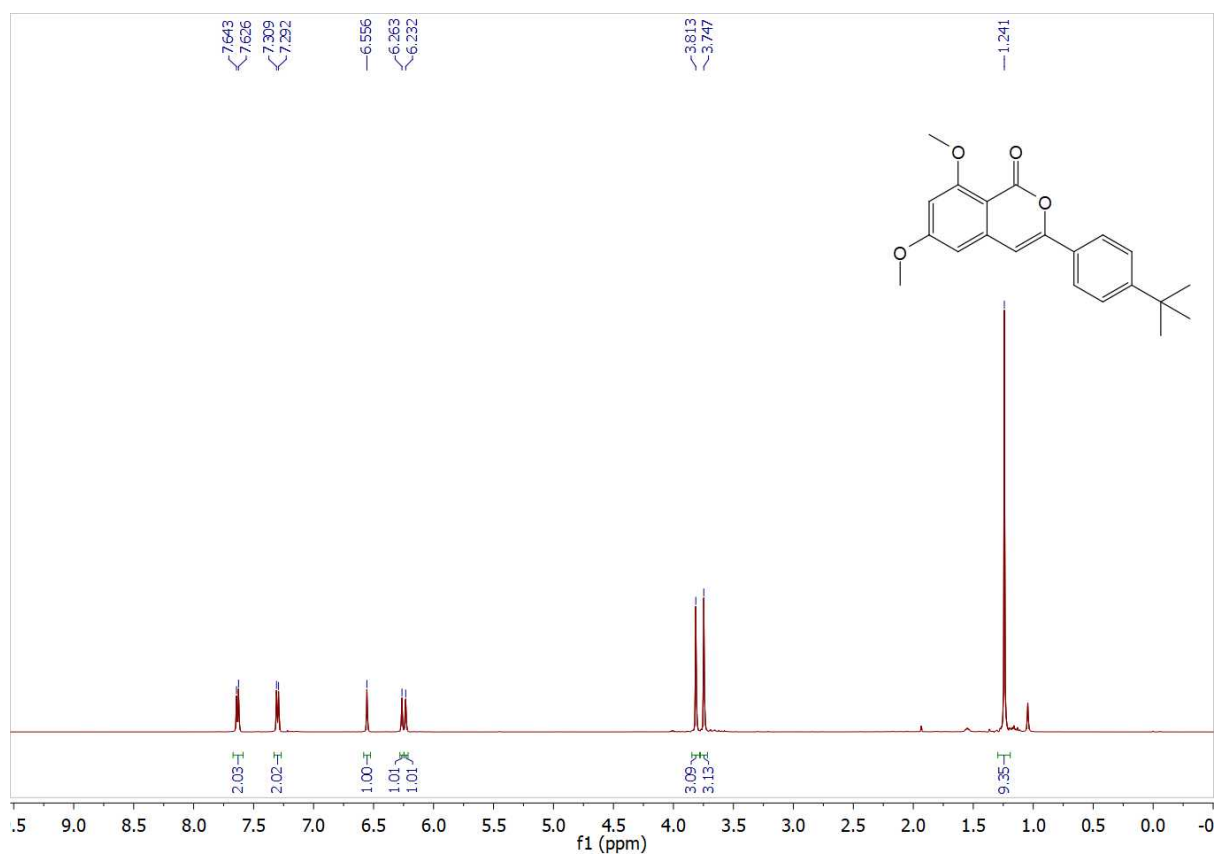

**<sup>1</sup>H NMR of compound 15**

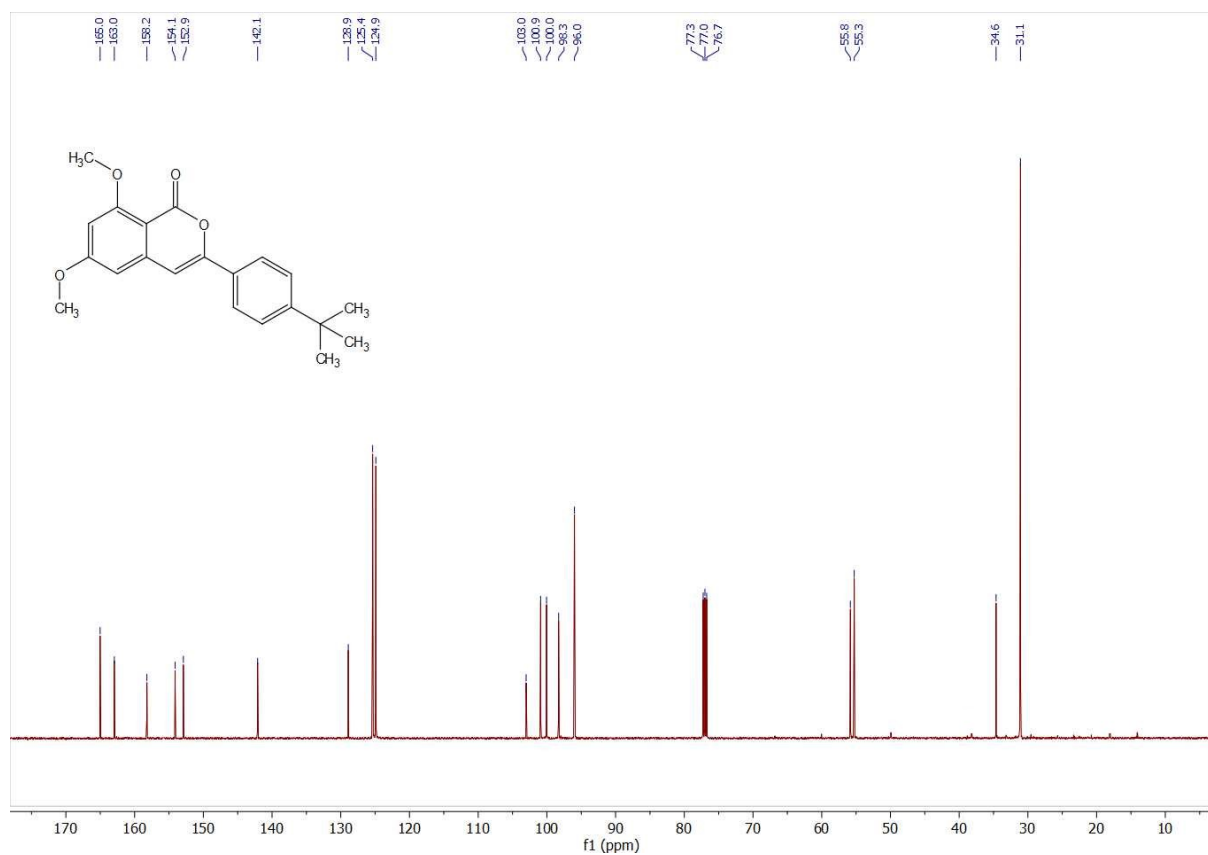

**<sup>13</sup>C{H} NMR of compound 15**

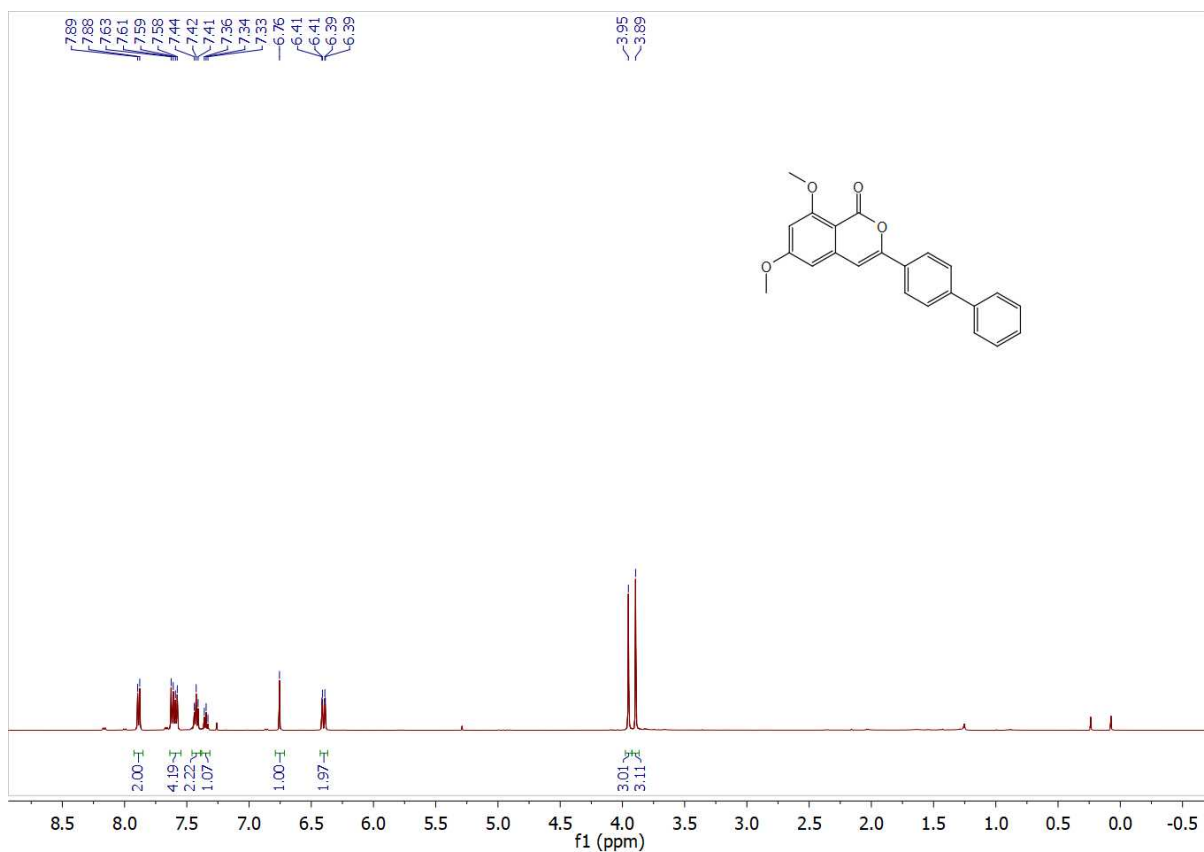

$^1\text{H}$  NMR of compound 16

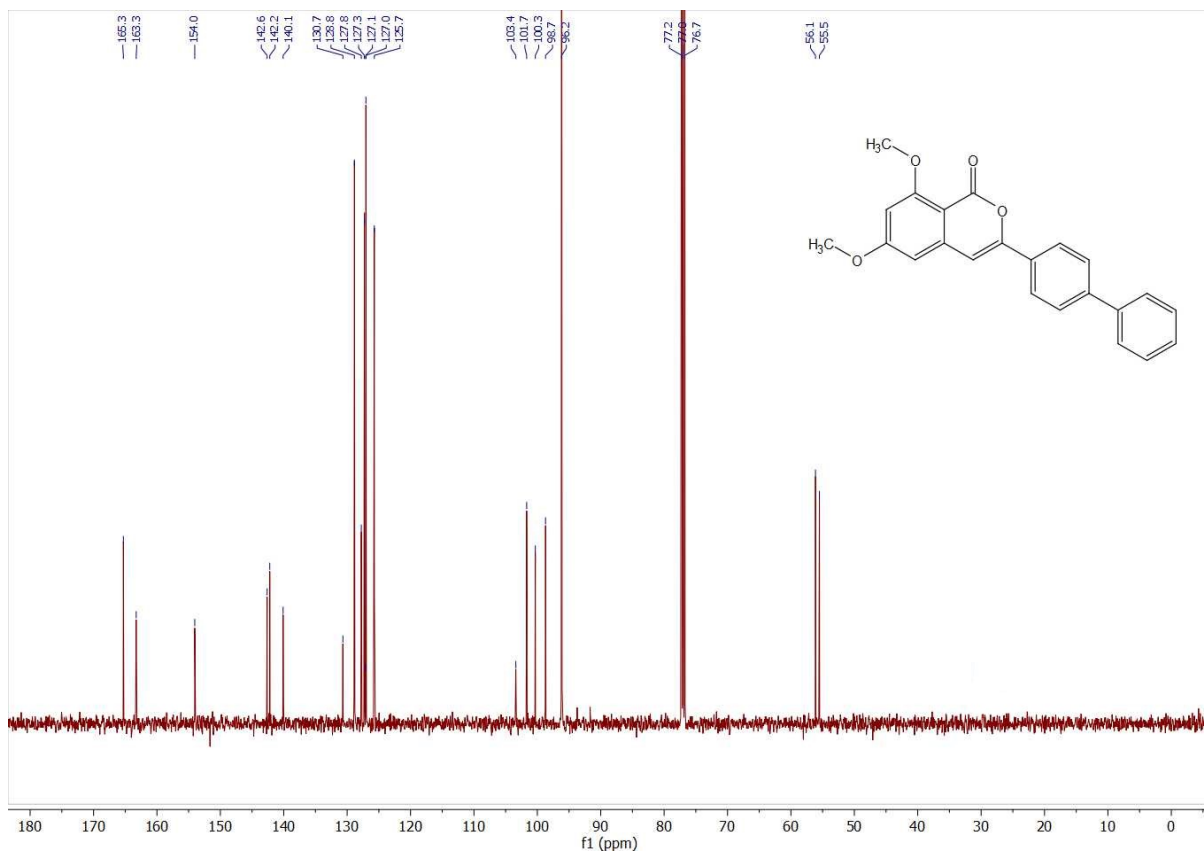

$^{13}\text{C}\{\text{H}\}$  NMR of compound 16

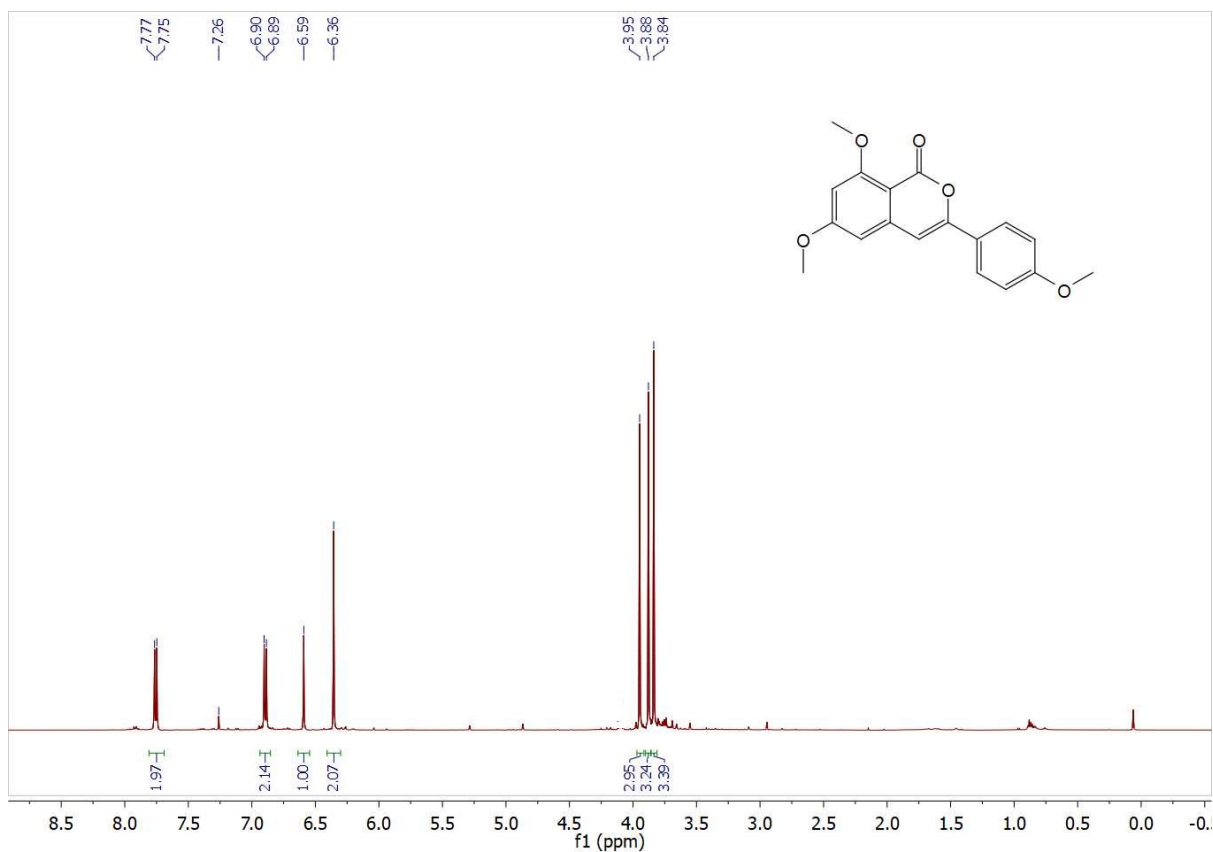

$^1\text{H}$  NMR of compound 17

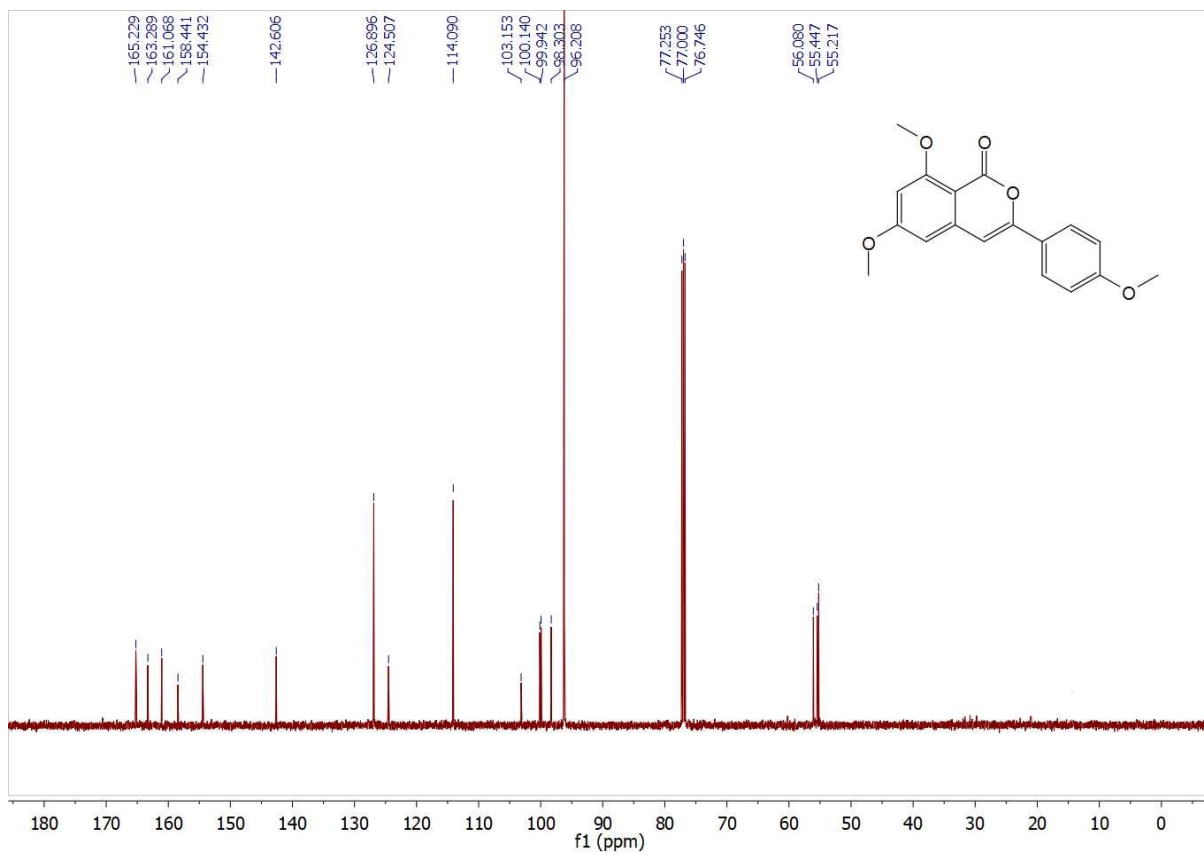

$^{13}\text{C}\{\text{H}\}$  NMR of compound 17



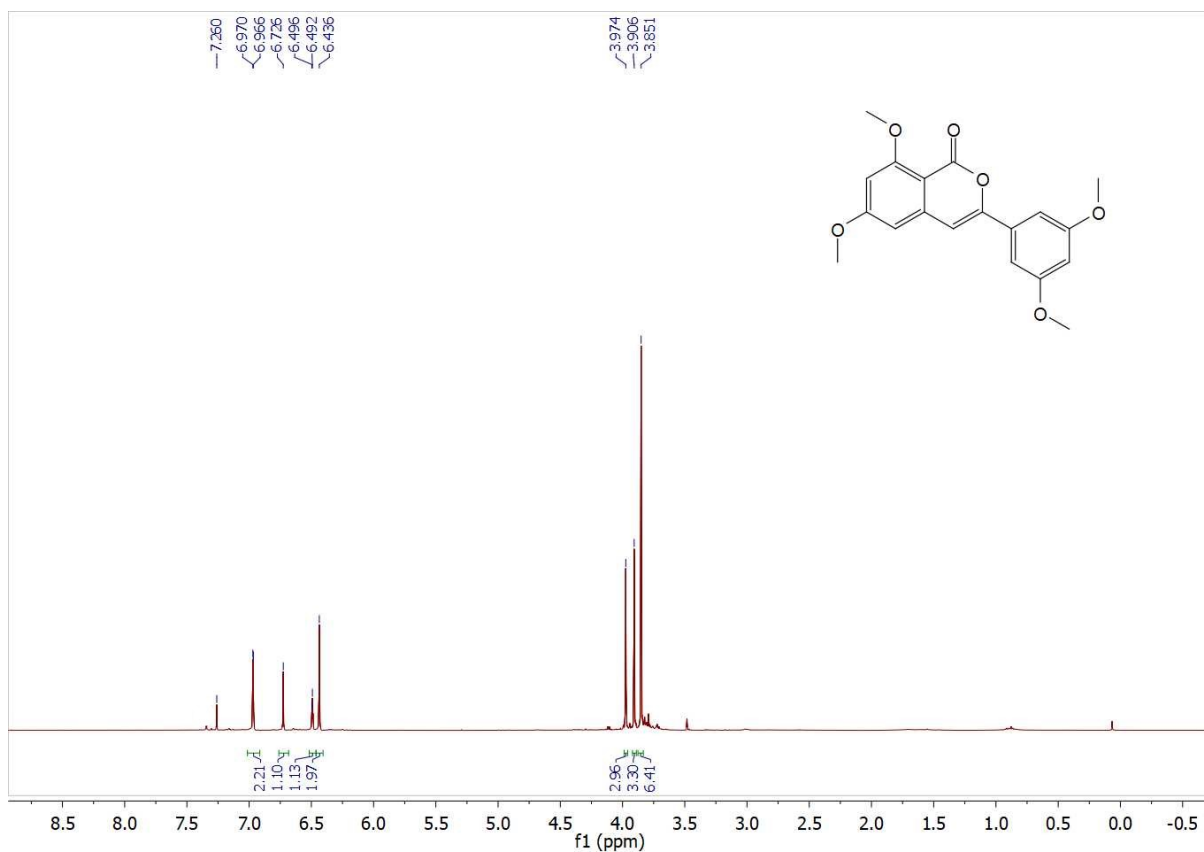

$^1\text{H}$  NMR of compound 18

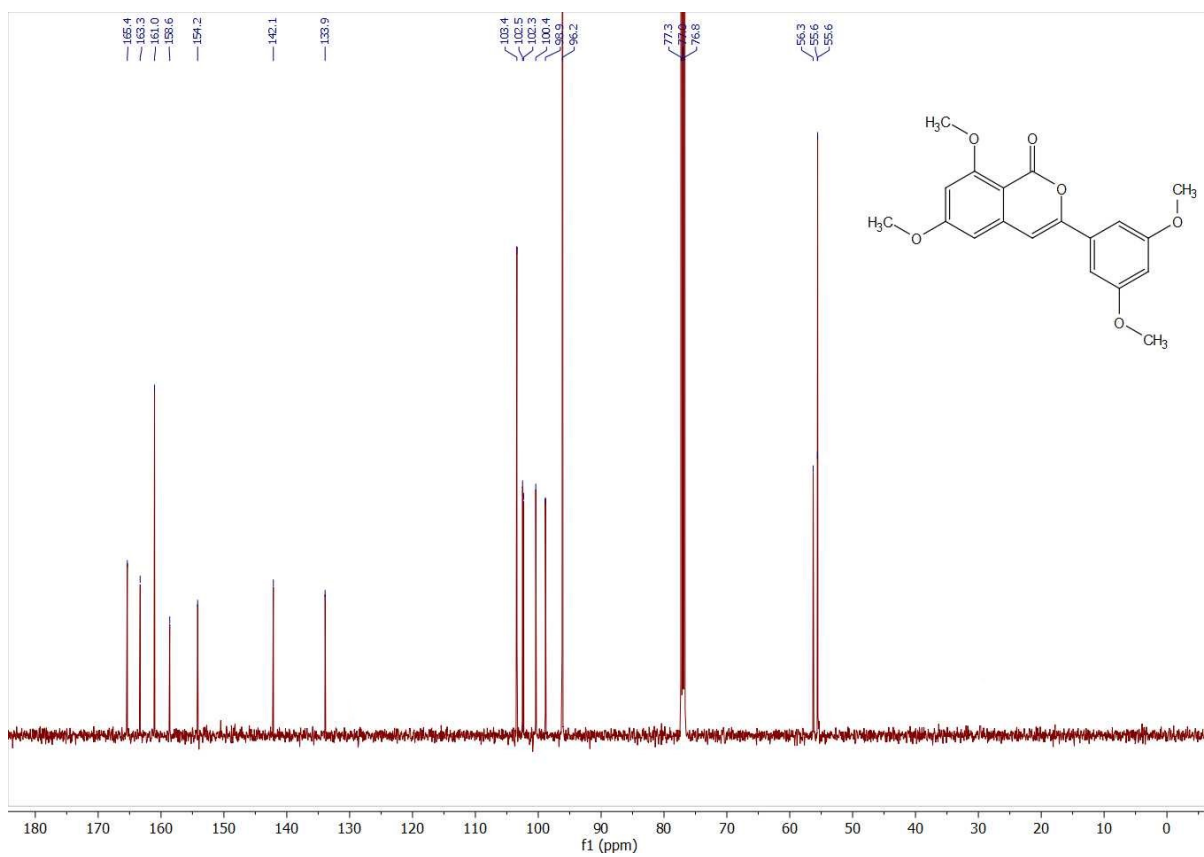

$^{13}\text{C}\{\text{H}\}$  NMR of compound 18

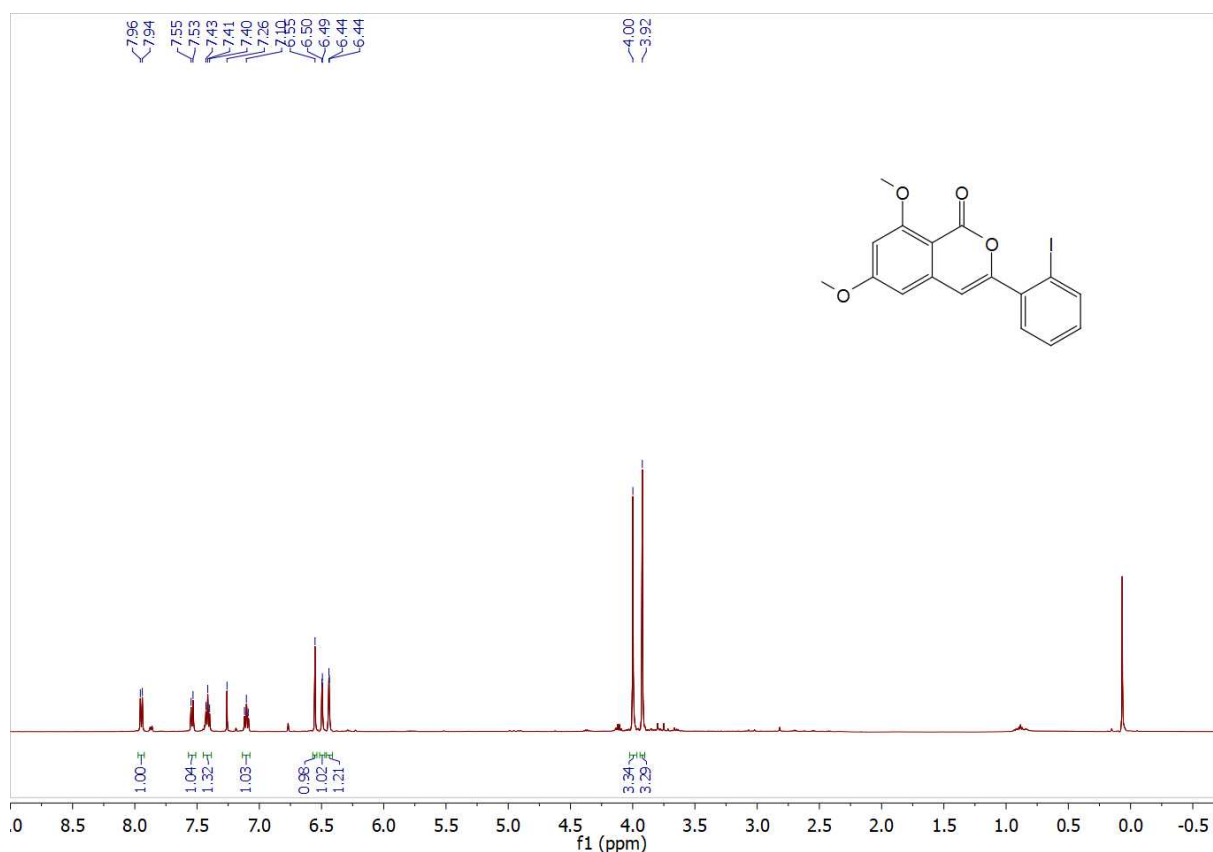

**<sup>1</sup>H NMR of compound 19**

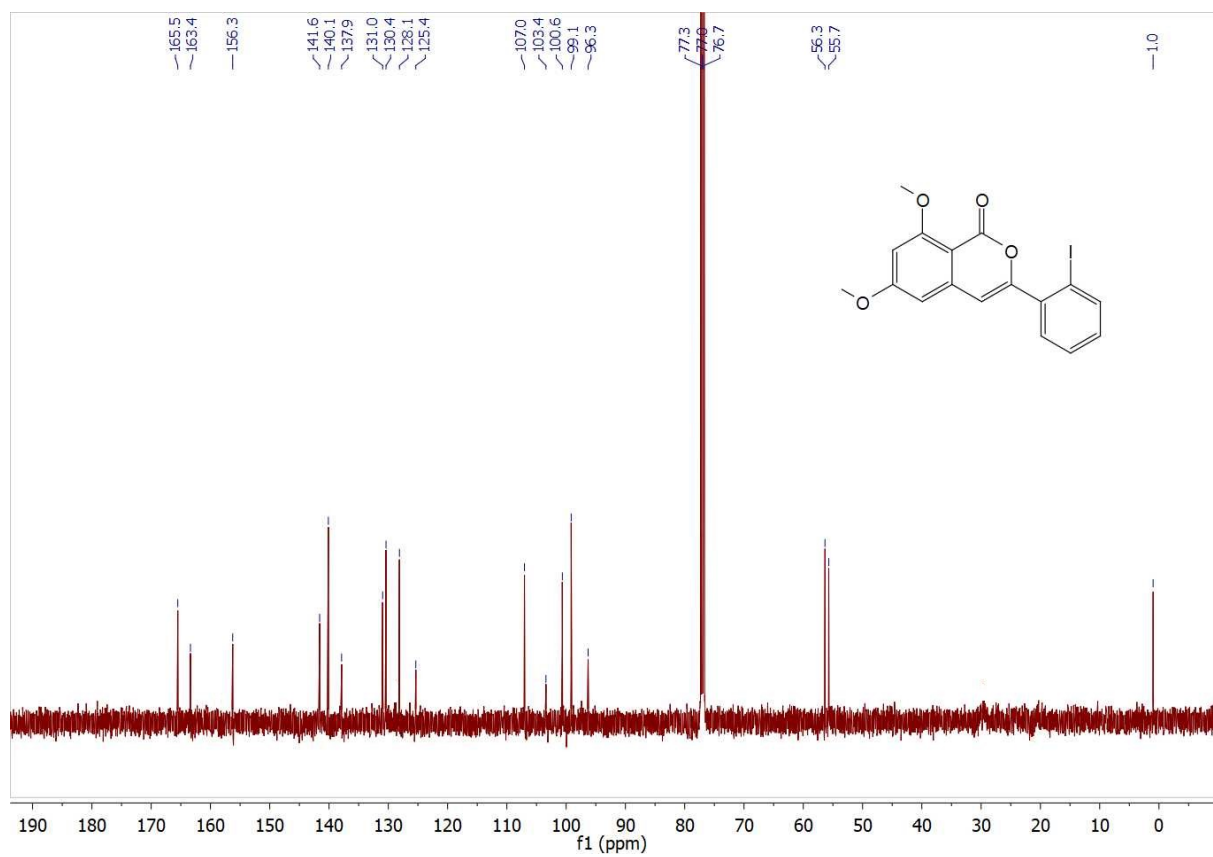

**<sup>13</sup>C{H} NMR of compound 19**

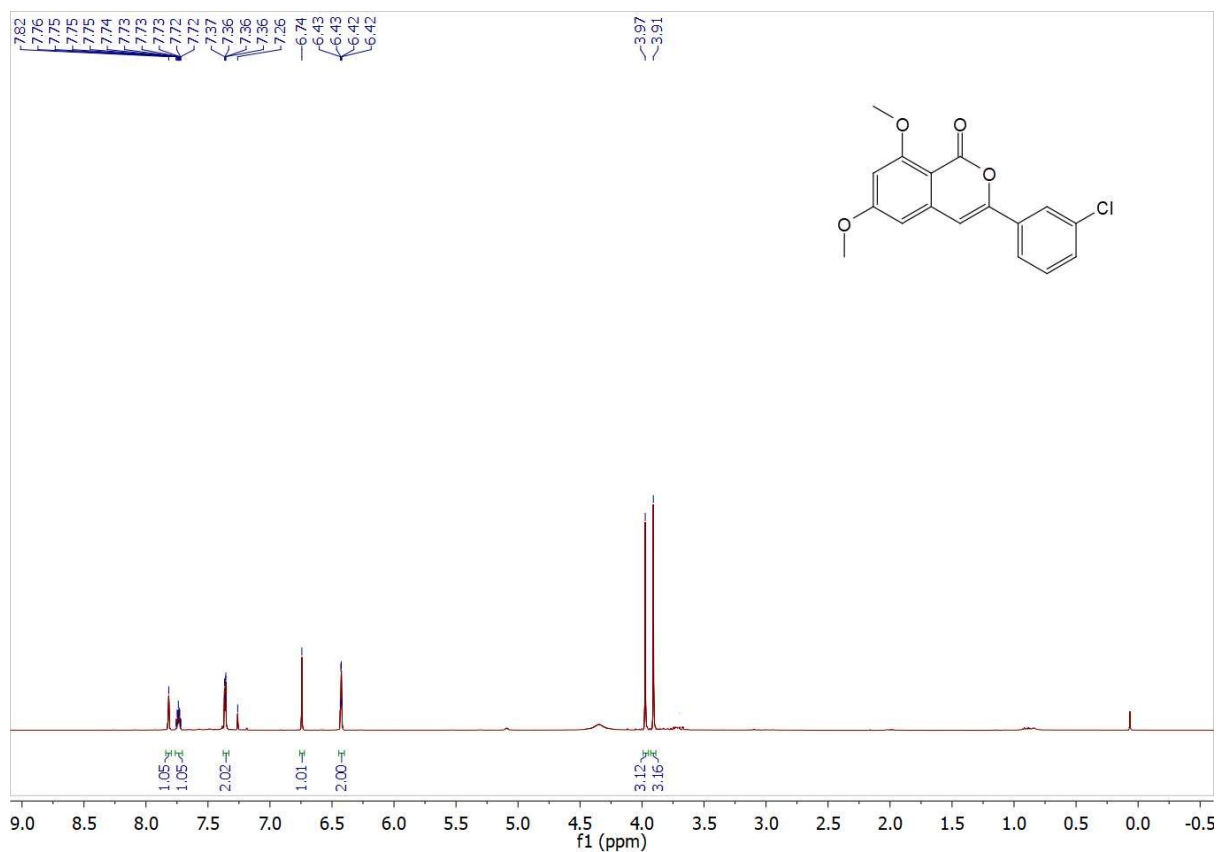

**<sup>1</sup>H NMR of compound 20**

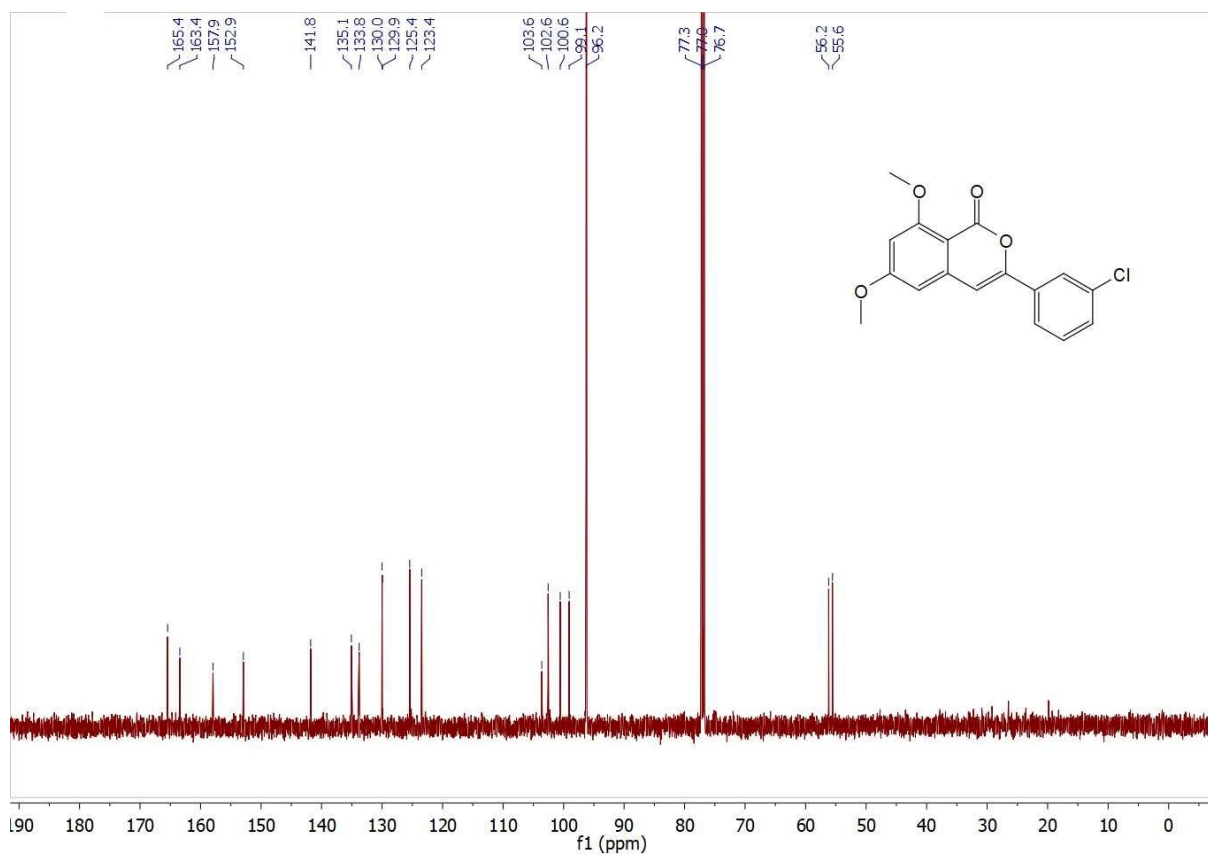

**<sup>13</sup>C{H} NMR of compound 20**

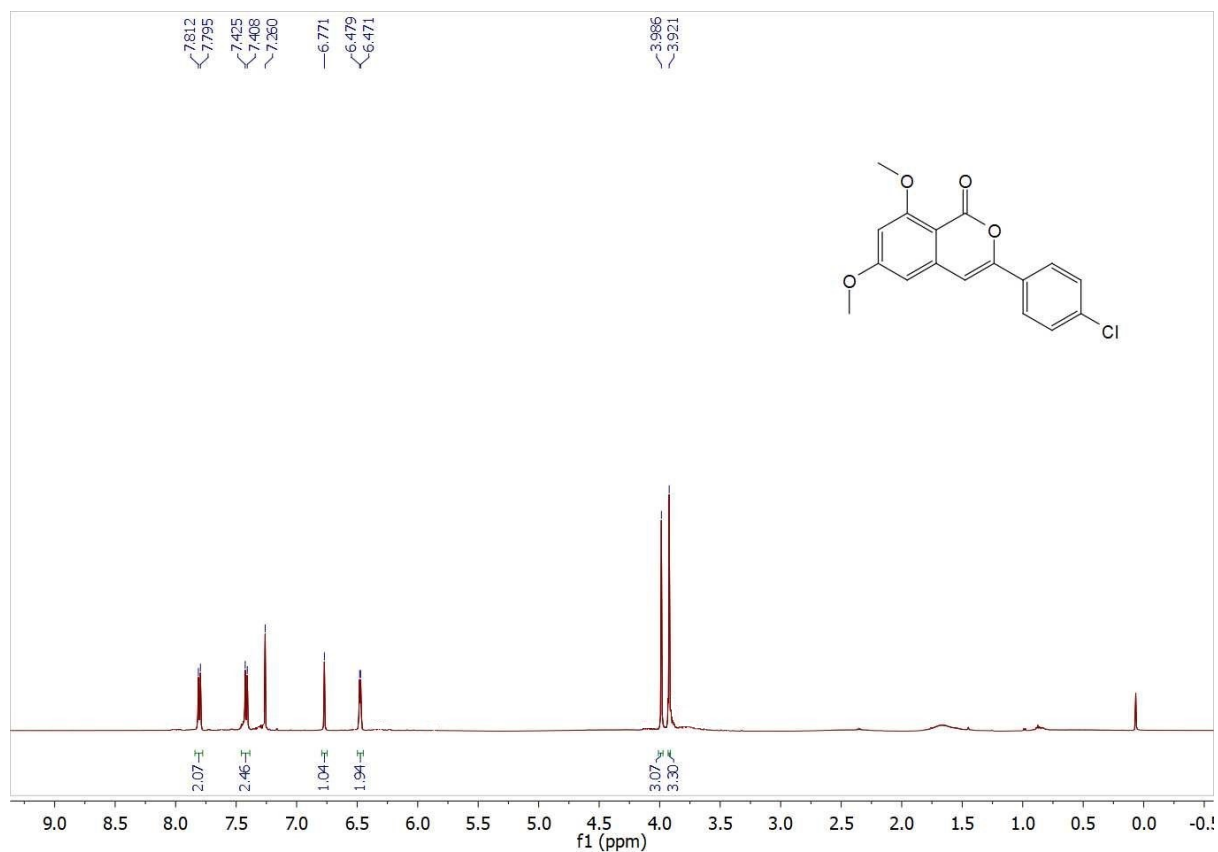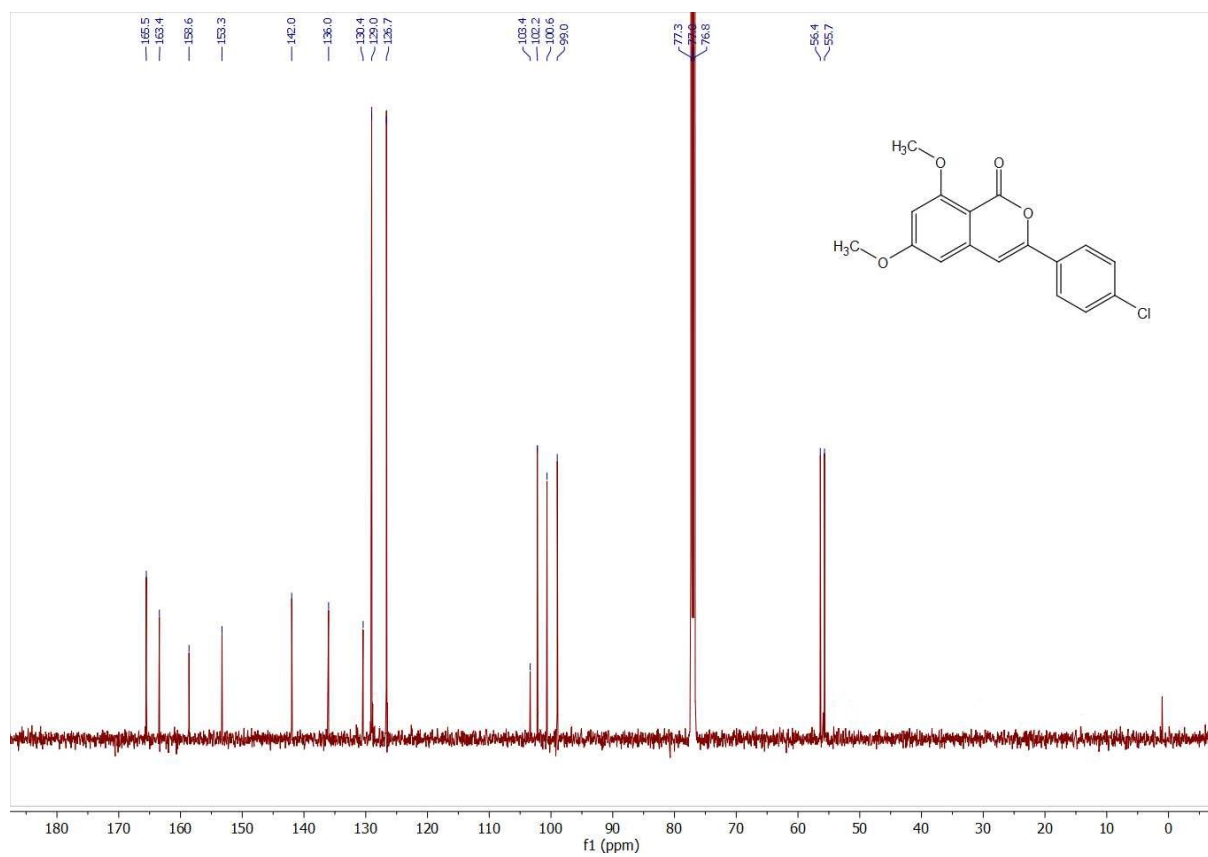

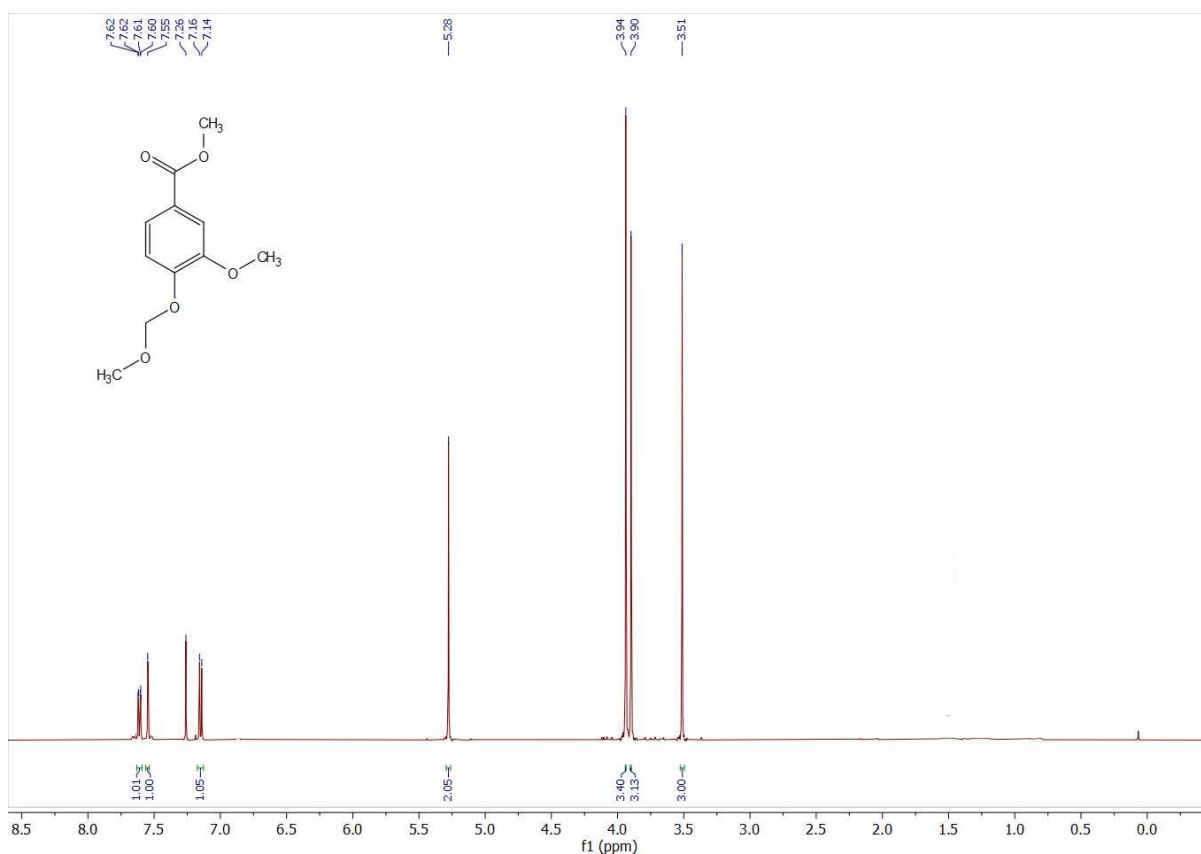

**<sup>1</sup>H NMR of compound 22a**

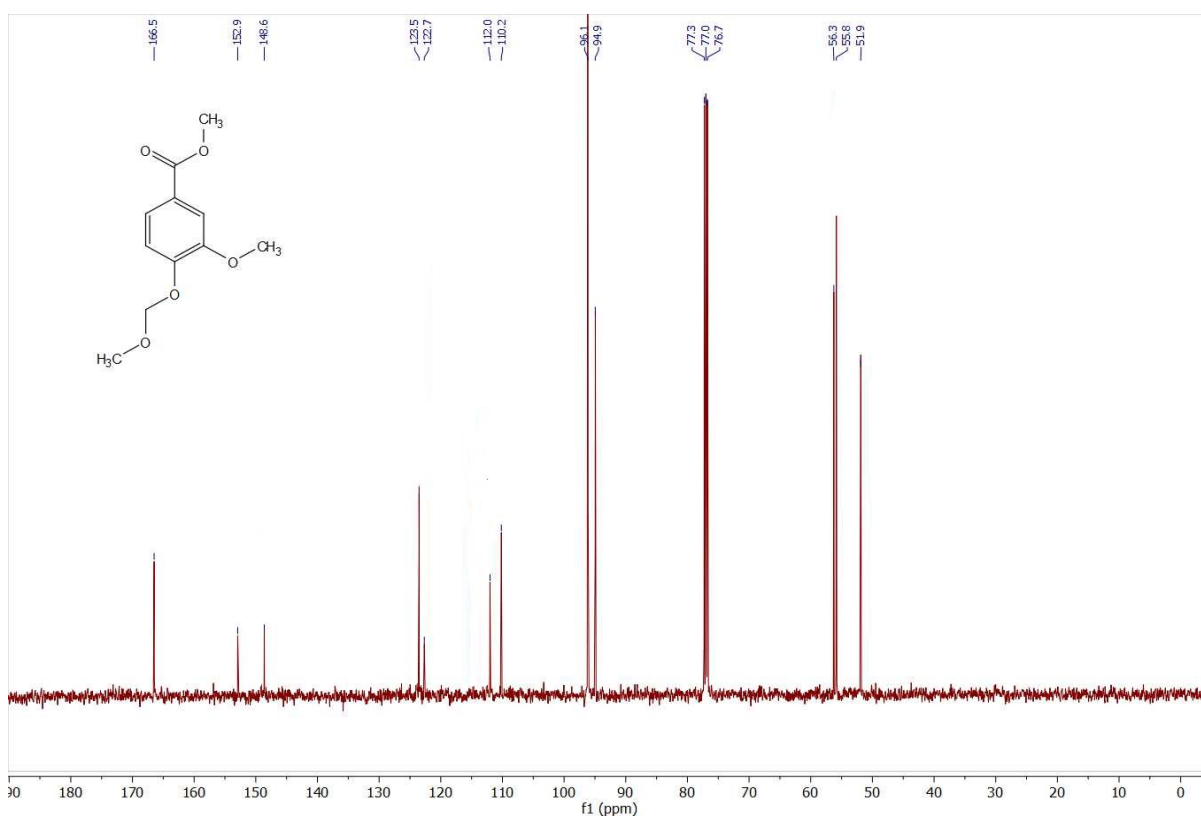

**<sup>13</sup>C{H} NMR of compound 22a**

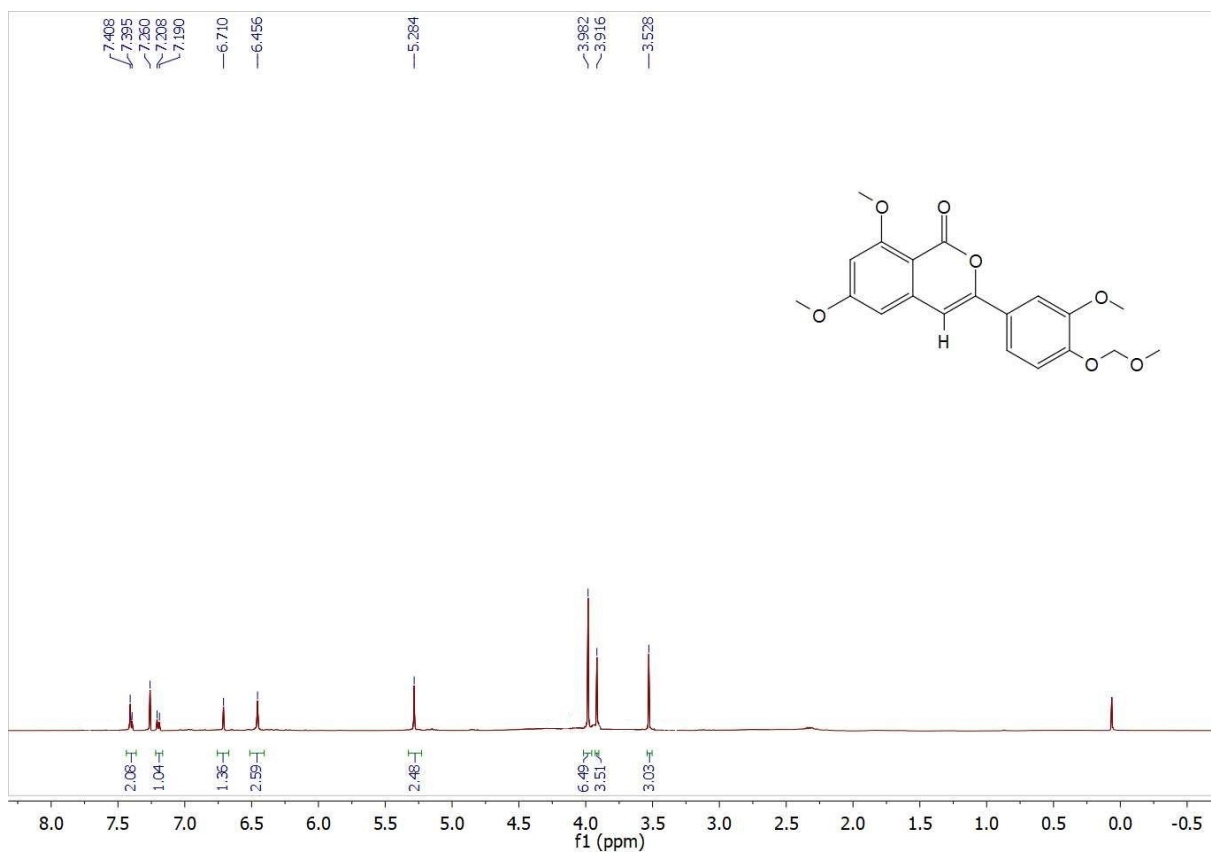

**$^1\text{H}$  NMR of compound 22**

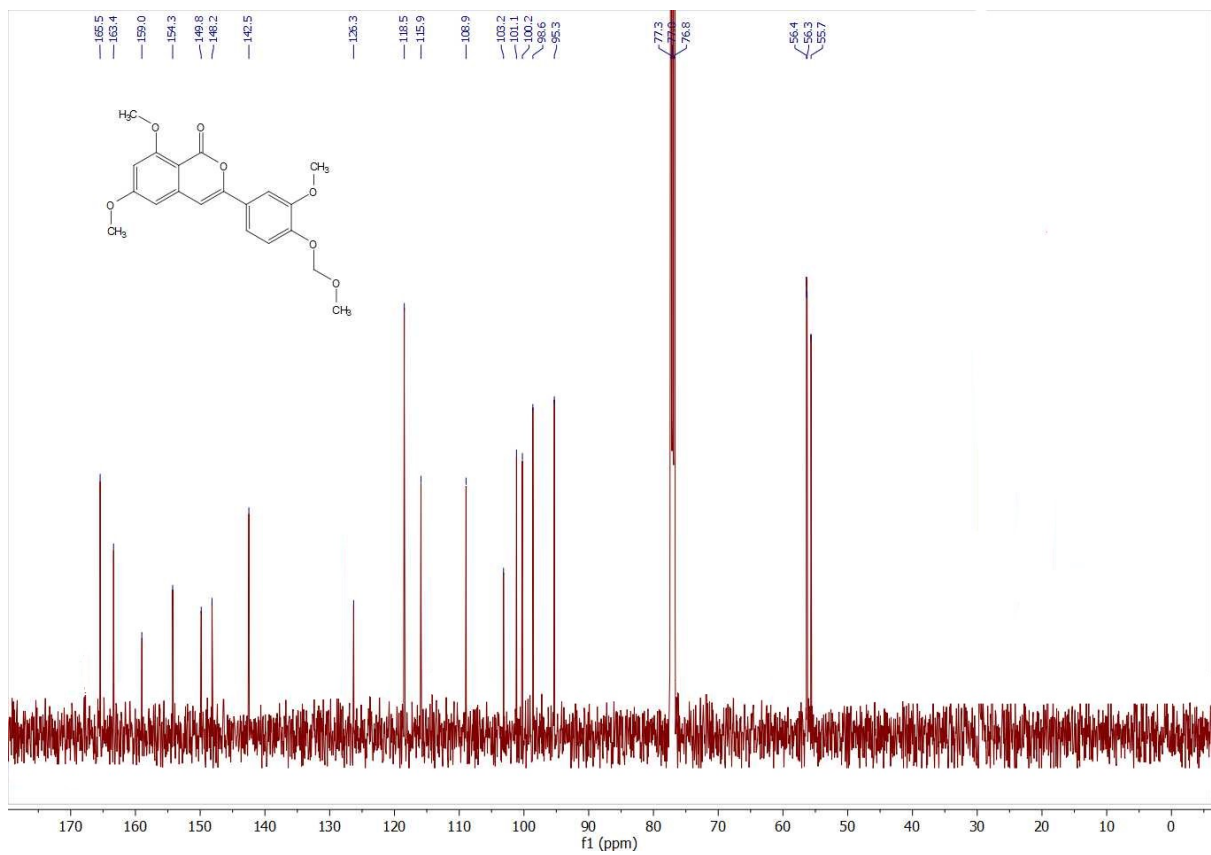

**$^{13}\text{C}\{\text{H}\}$  NMR of compound 22**

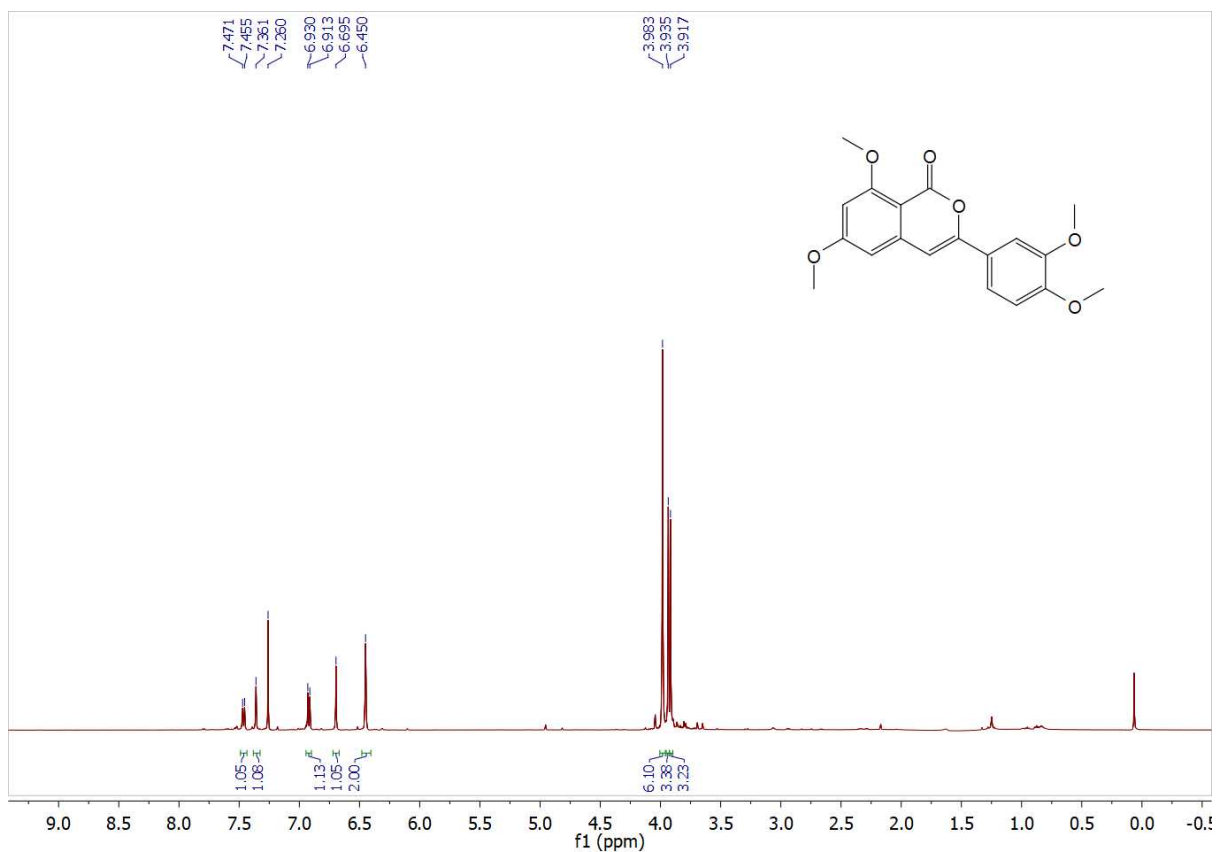

**<sup>1</sup>H NMR of compound 23**

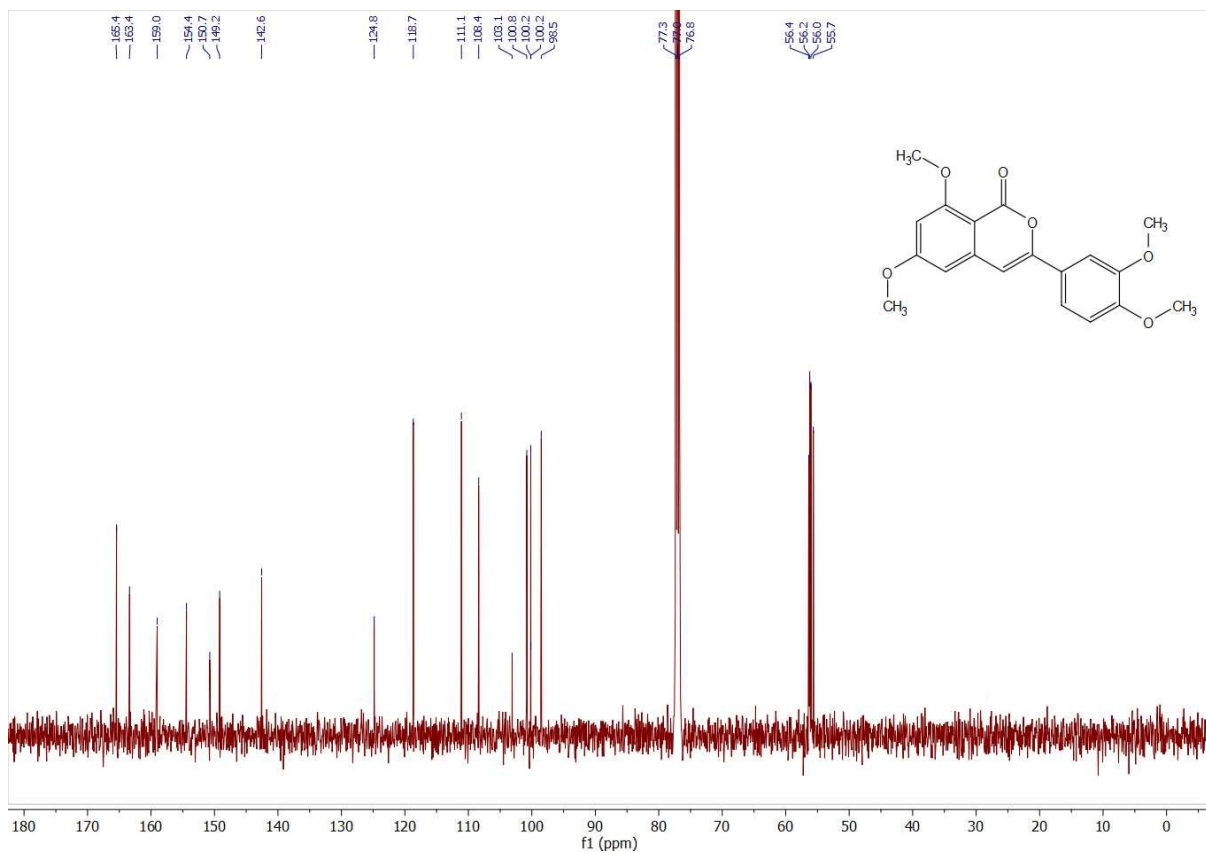

**<sup>13</sup>C{H} NMR of compound 23**

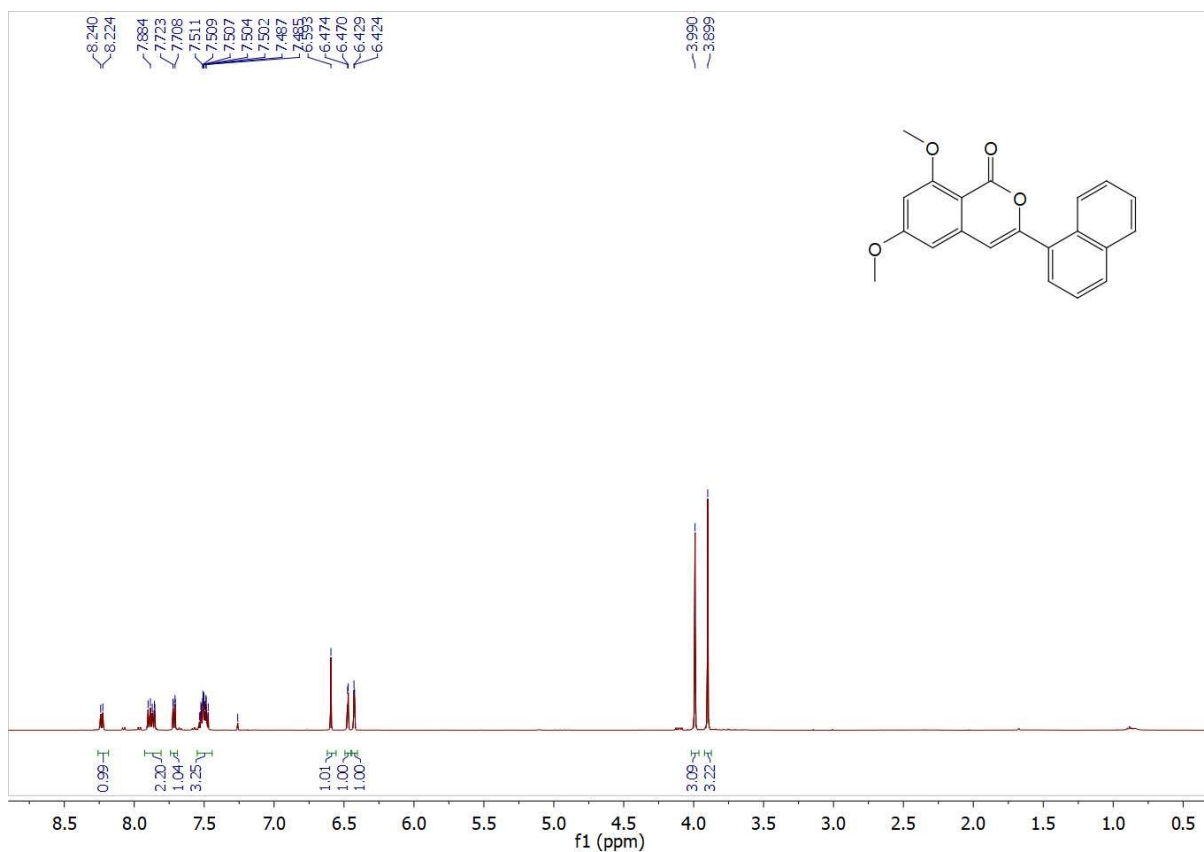

**$^1\text{H}$  NMR of compound 24**

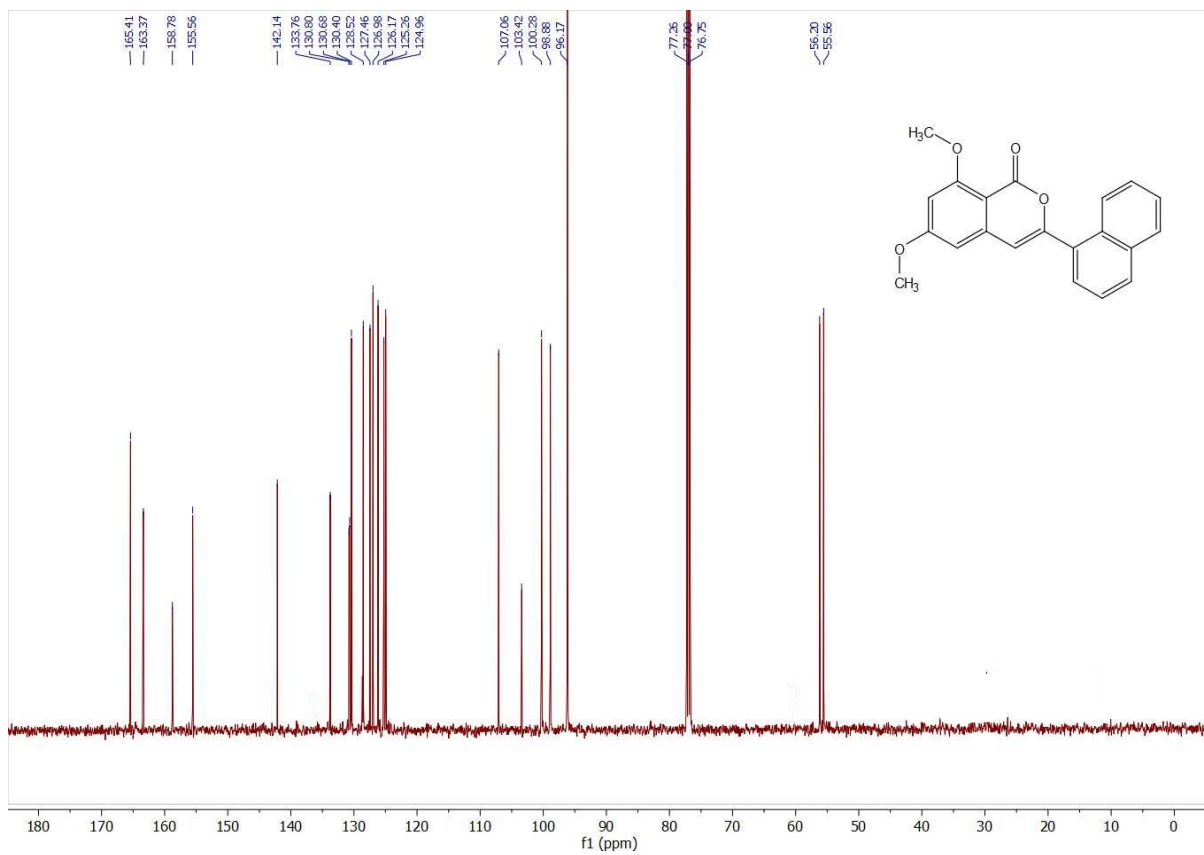

**$^{13}\text{C}\{\text{H}\}$  NMR of compound 24**



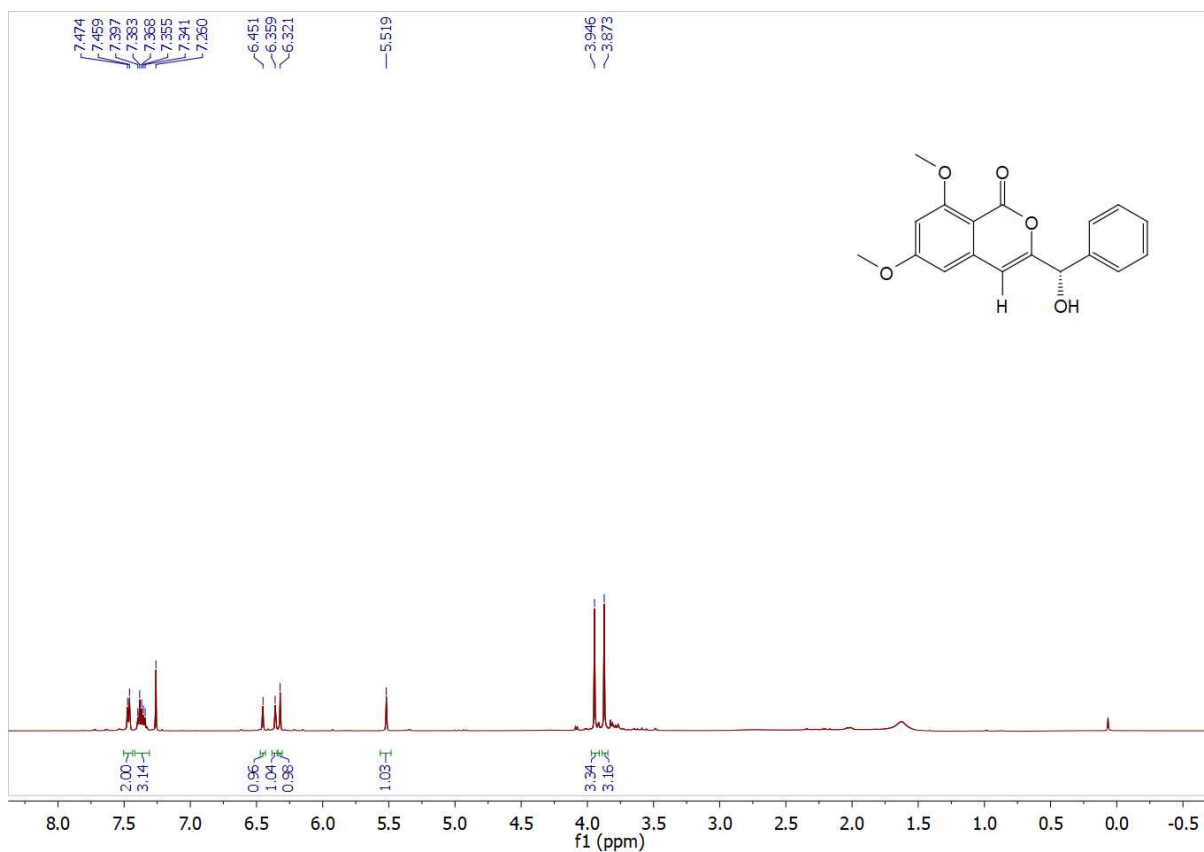

**<sup>1</sup>H NMR of compound 25**

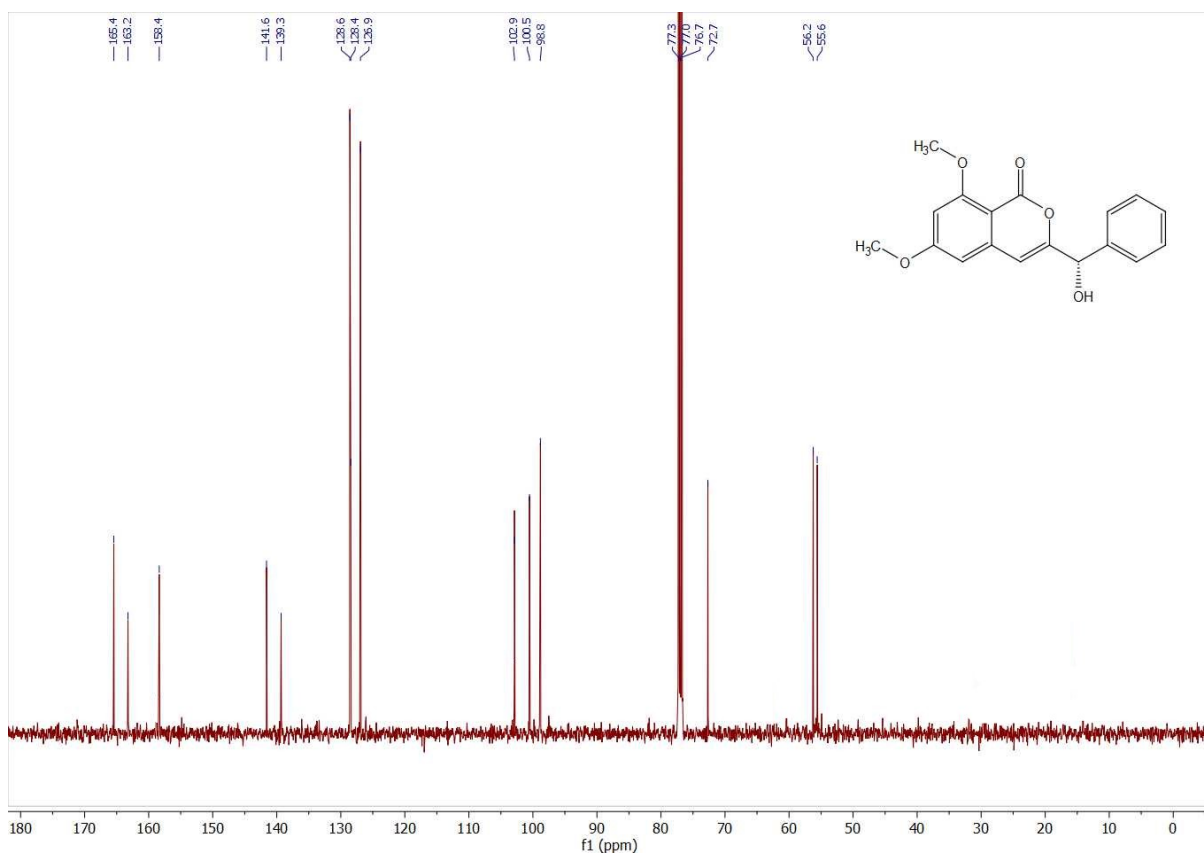

**<sup>13</sup>C{H} NMR of compound 25**

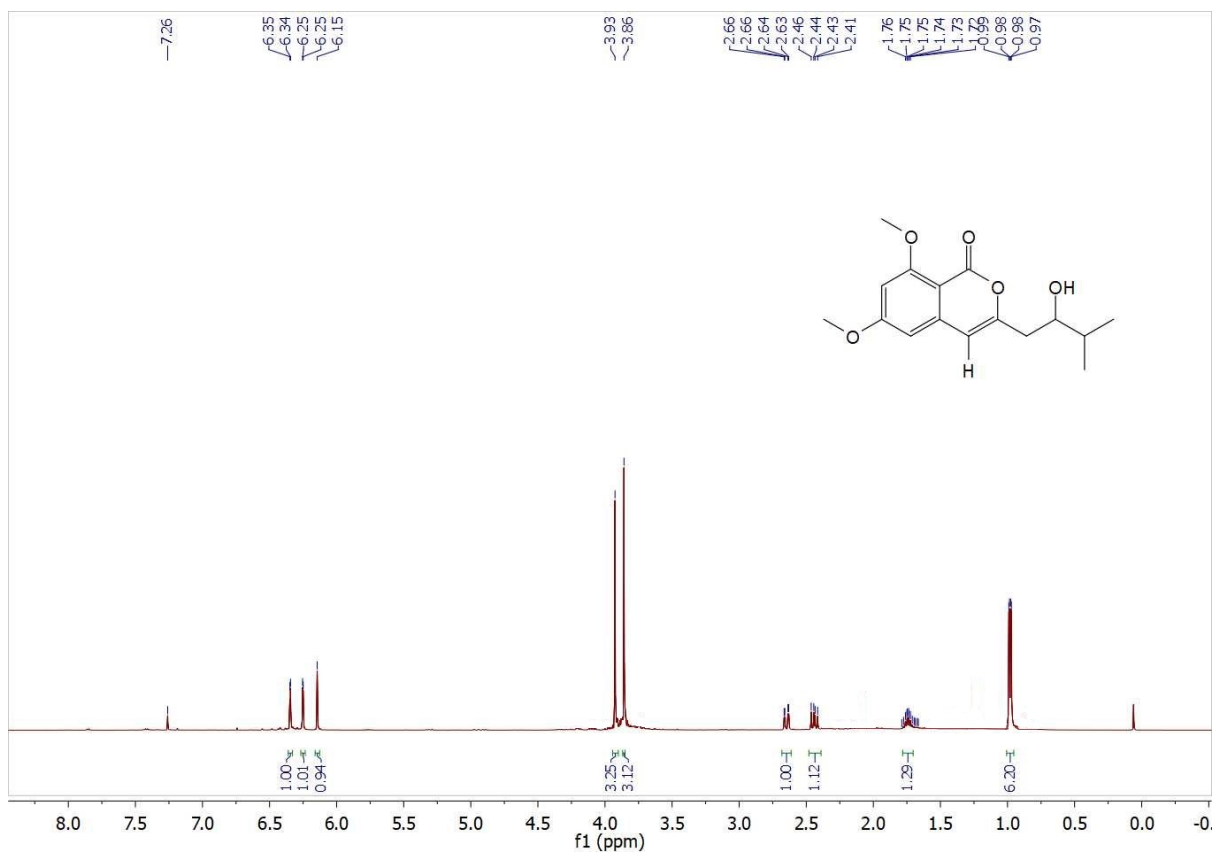

**$^1\text{H}$  NMR of compound 26**

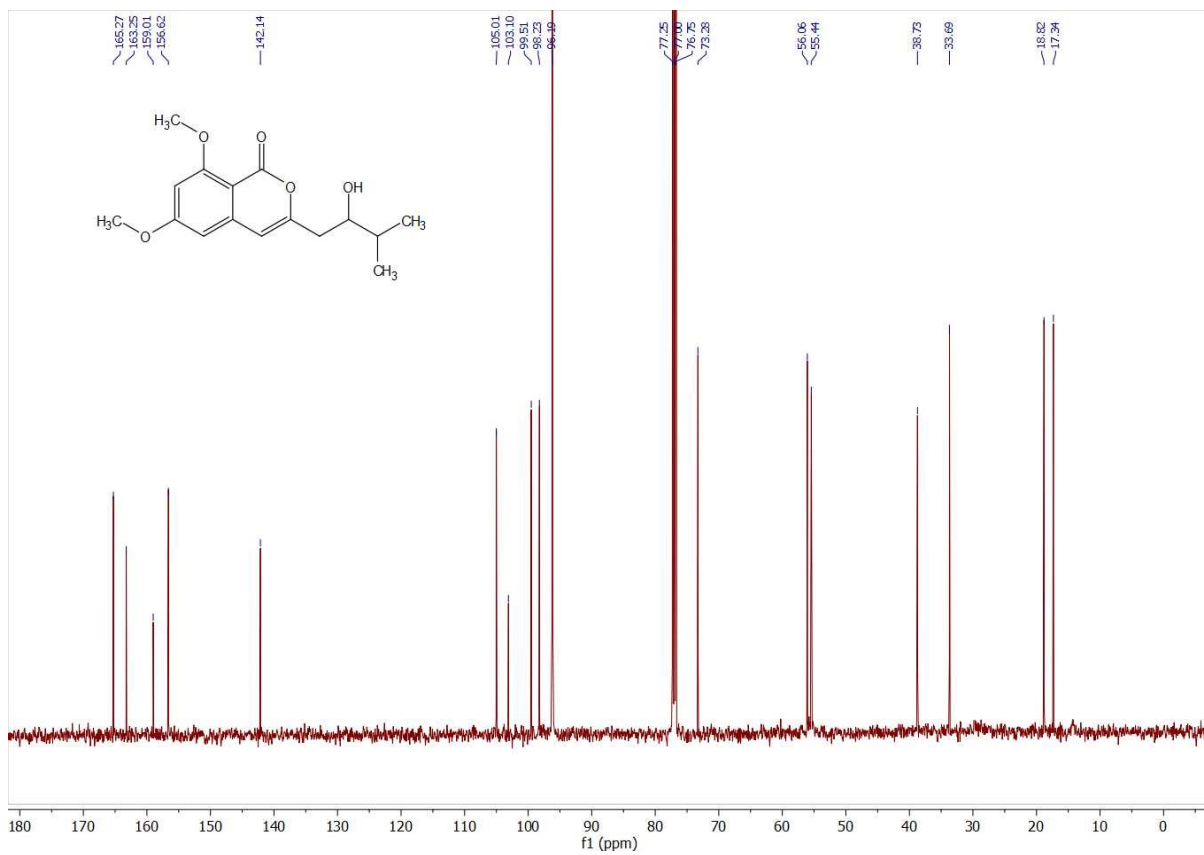

**$^{13}\text{C}\{\text{H}\}$  NMR of compound 26**

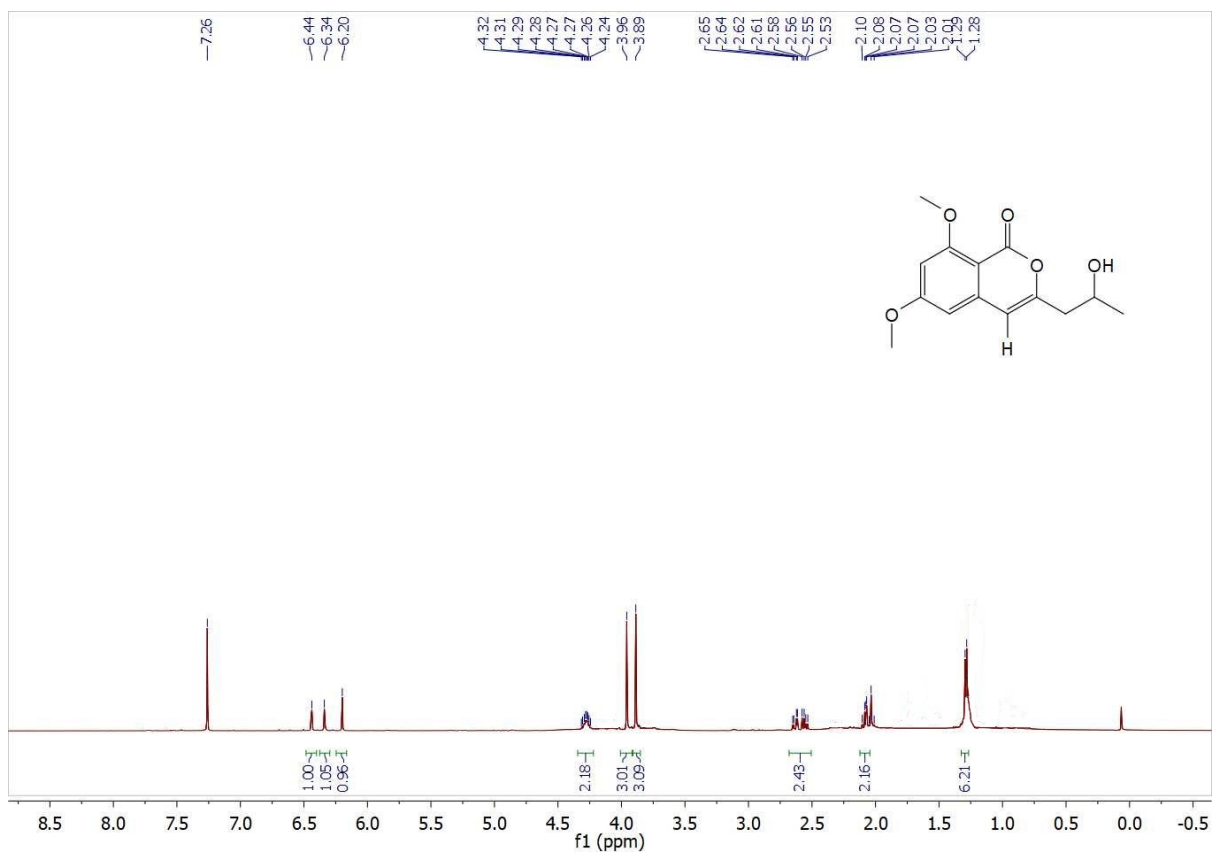

**<sup>1</sup>H NMR of compound 27**

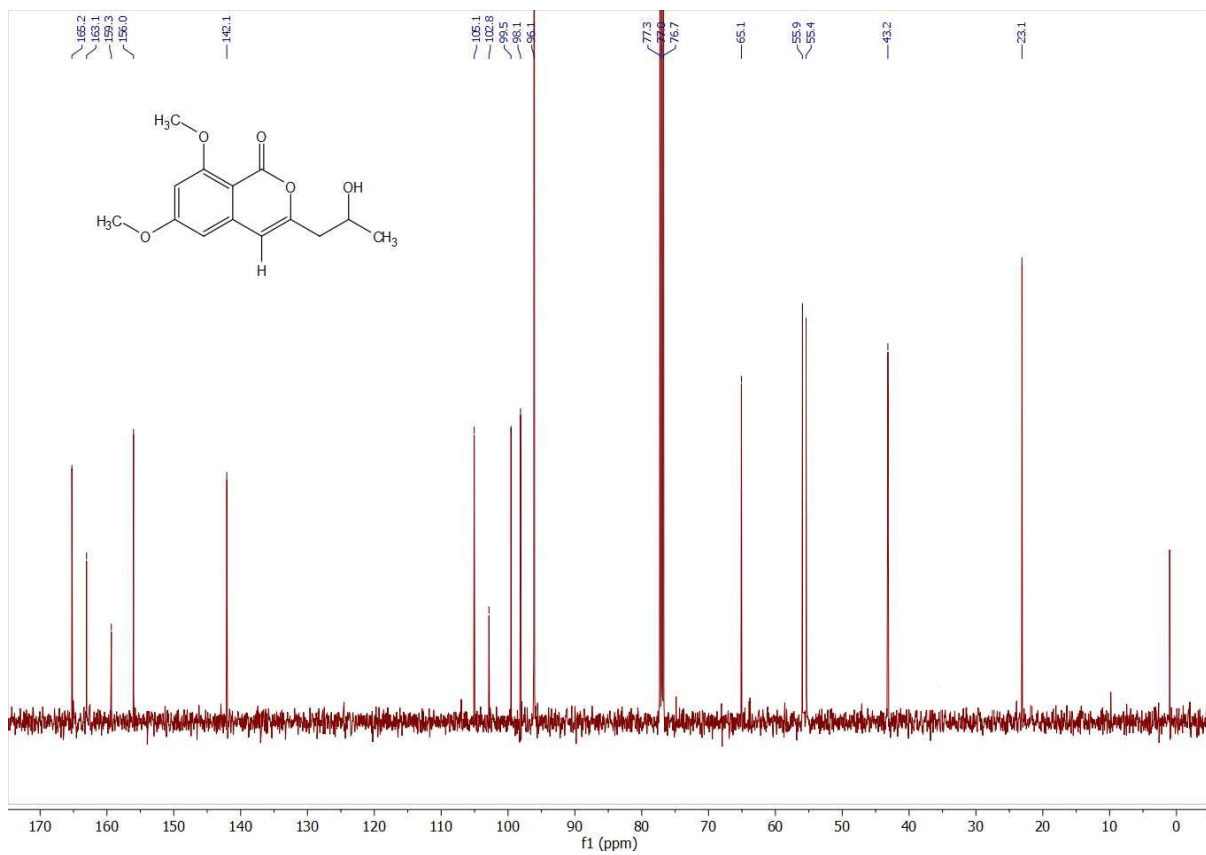

**<sup>13</sup>C{H} NMR of compound 27**

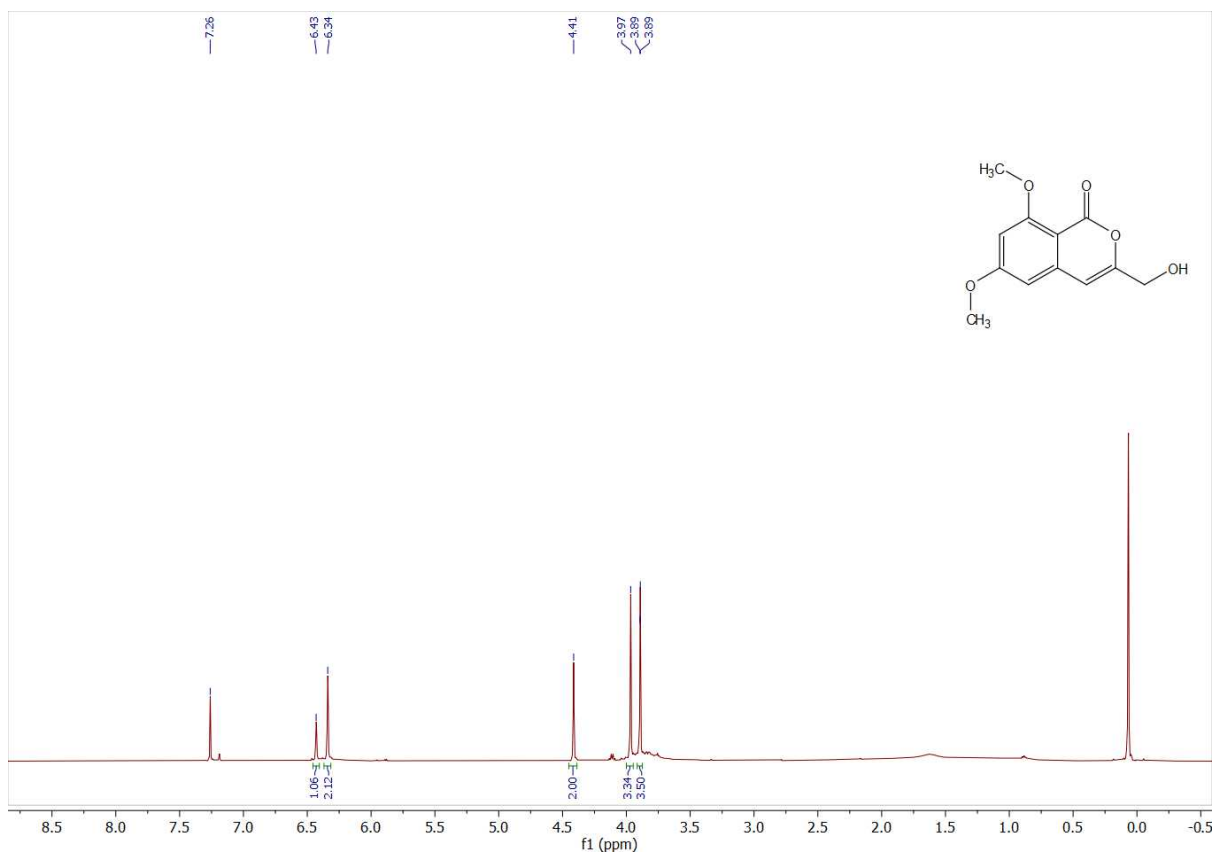

**<sup>1</sup>H NMR of Compound 28**

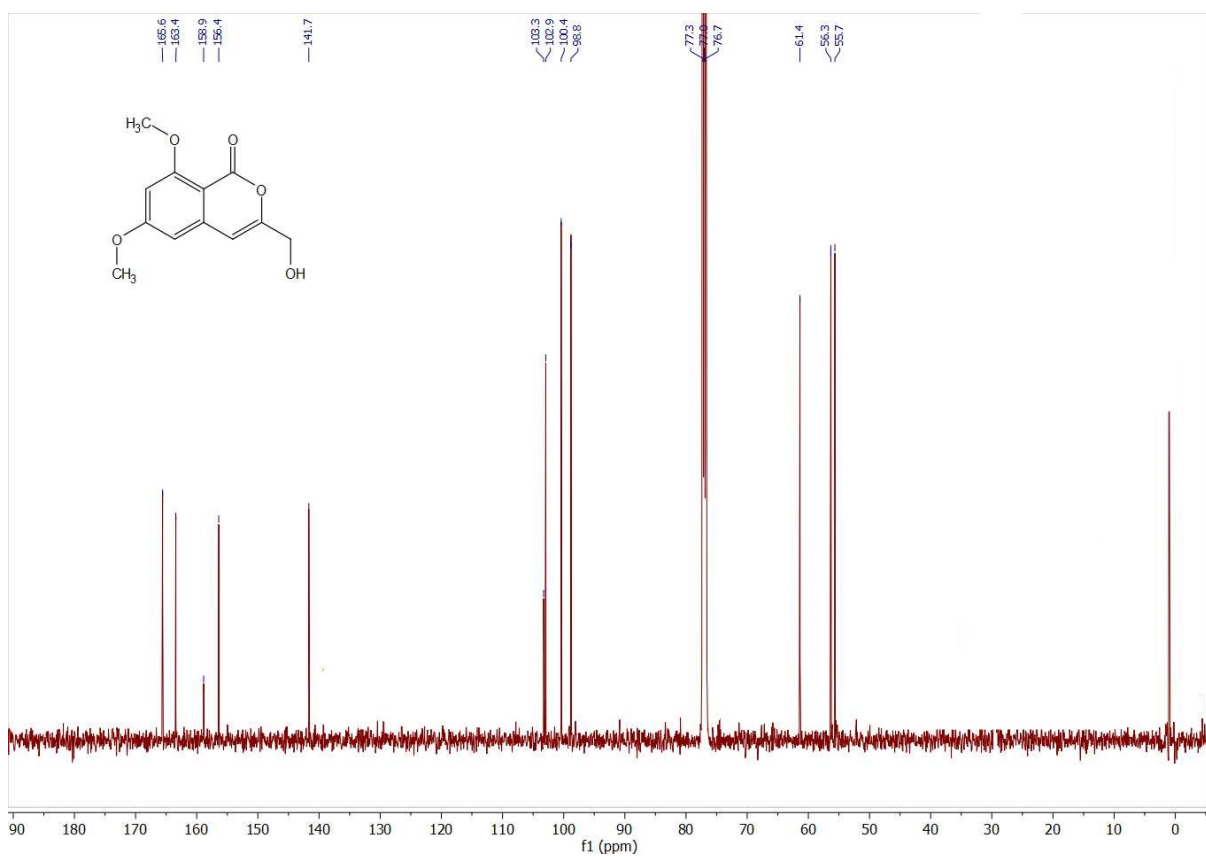

**<sup>13</sup>C{H} NMR of Compound 28**

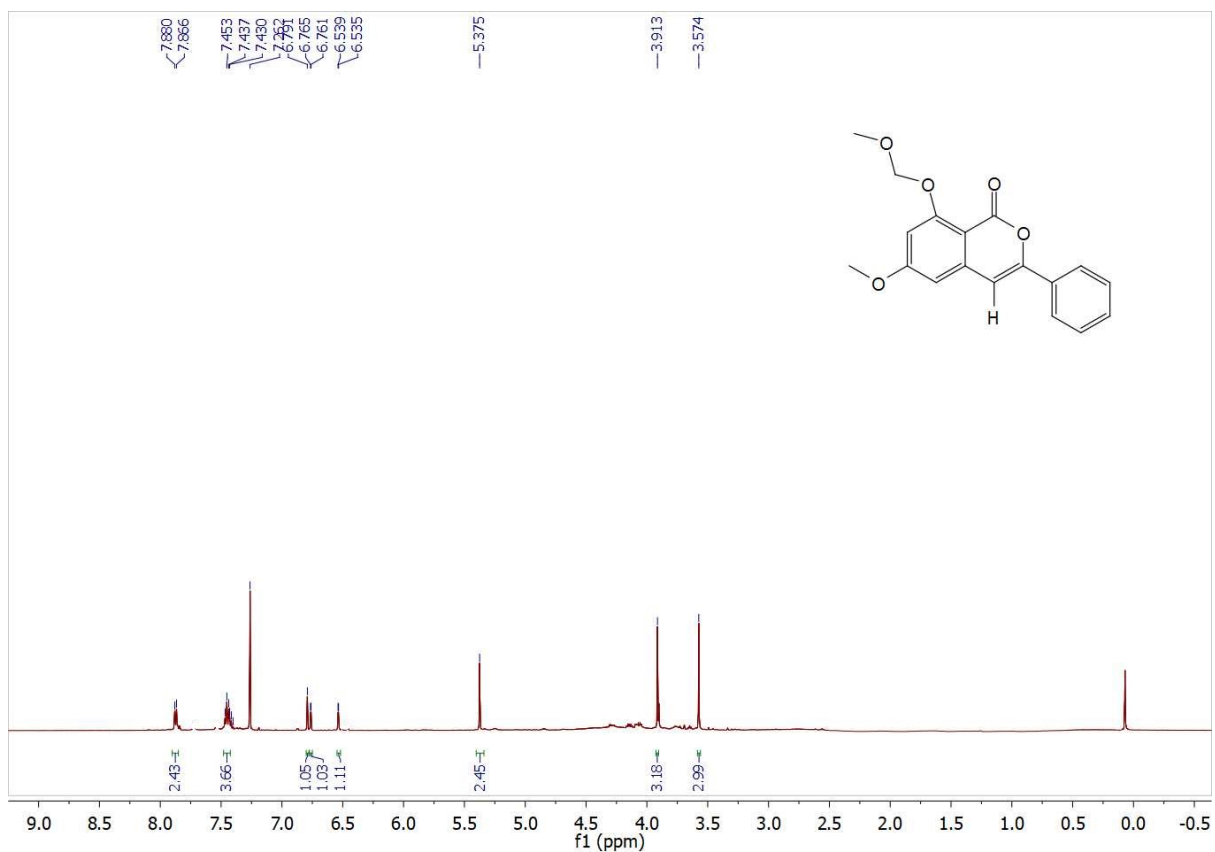

**<sup>1</sup>H NMR of compound 32**

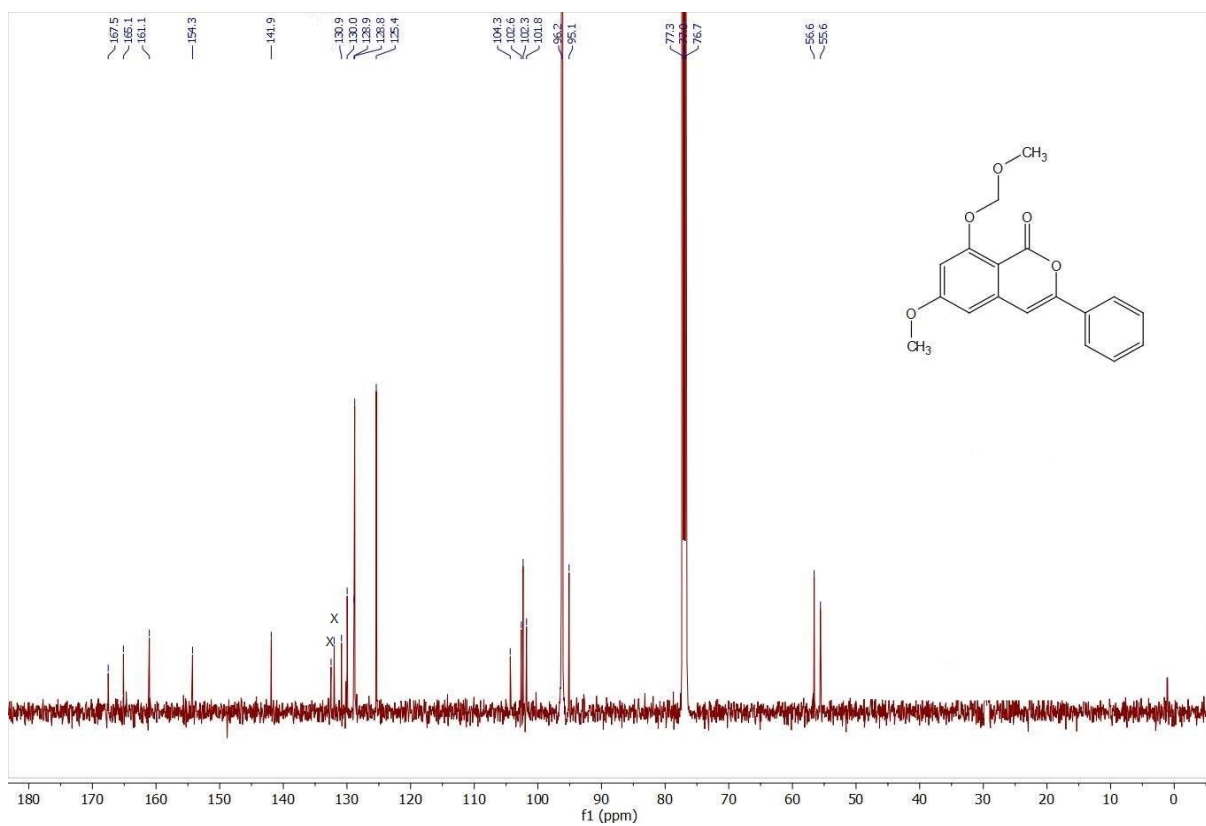

**<sup>13</sup>C{<sup>1</sup>H} NMR of compound 32.**

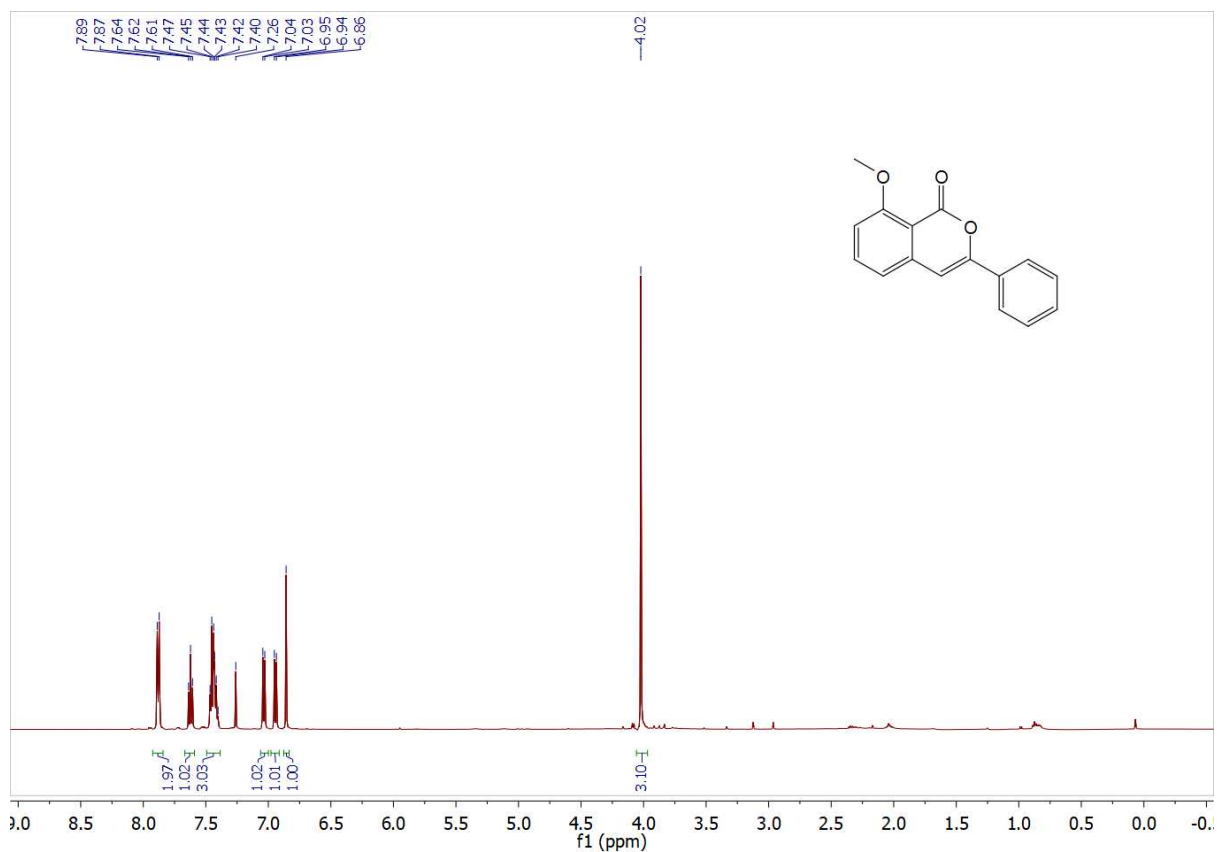

**$^1\text{H}$  NMR of compound 33**

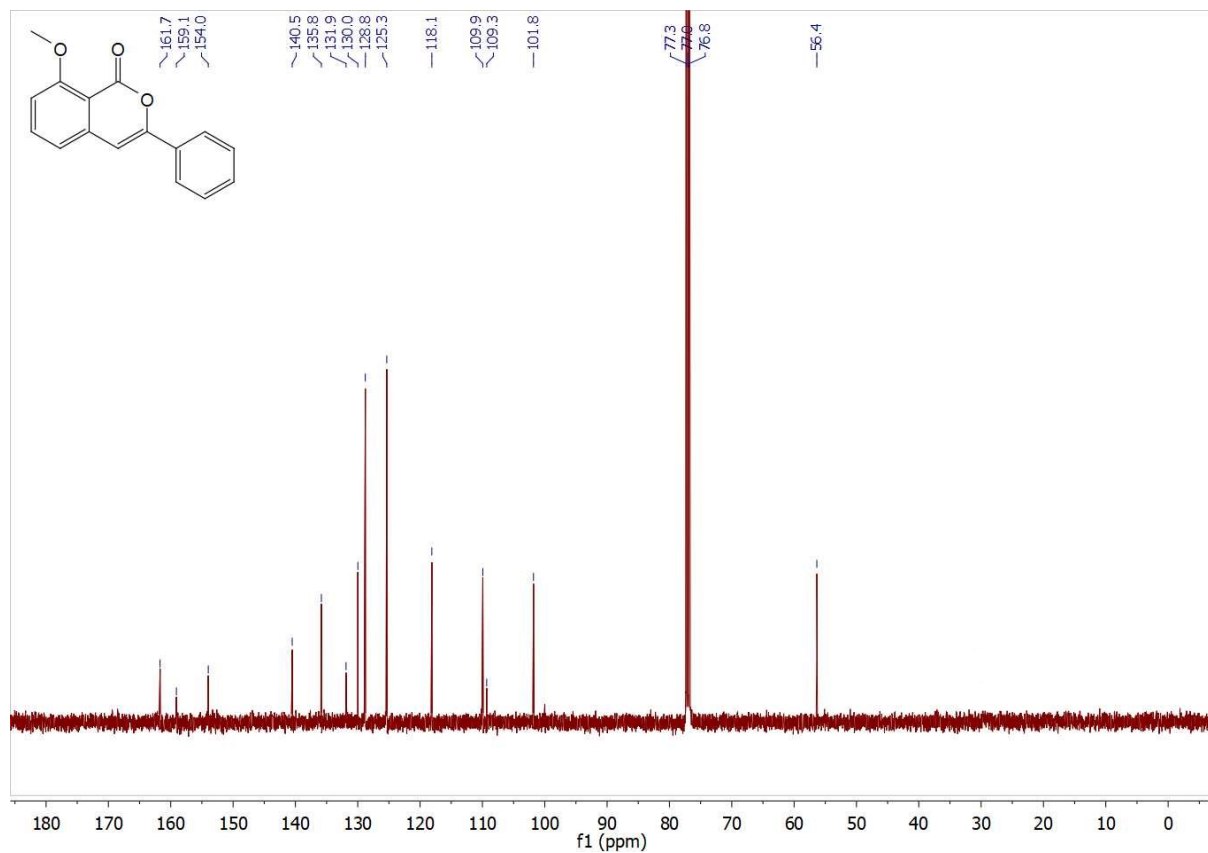

**$^{13}\text{C}\{^1\text{H}\}$  NMR of compound 33**

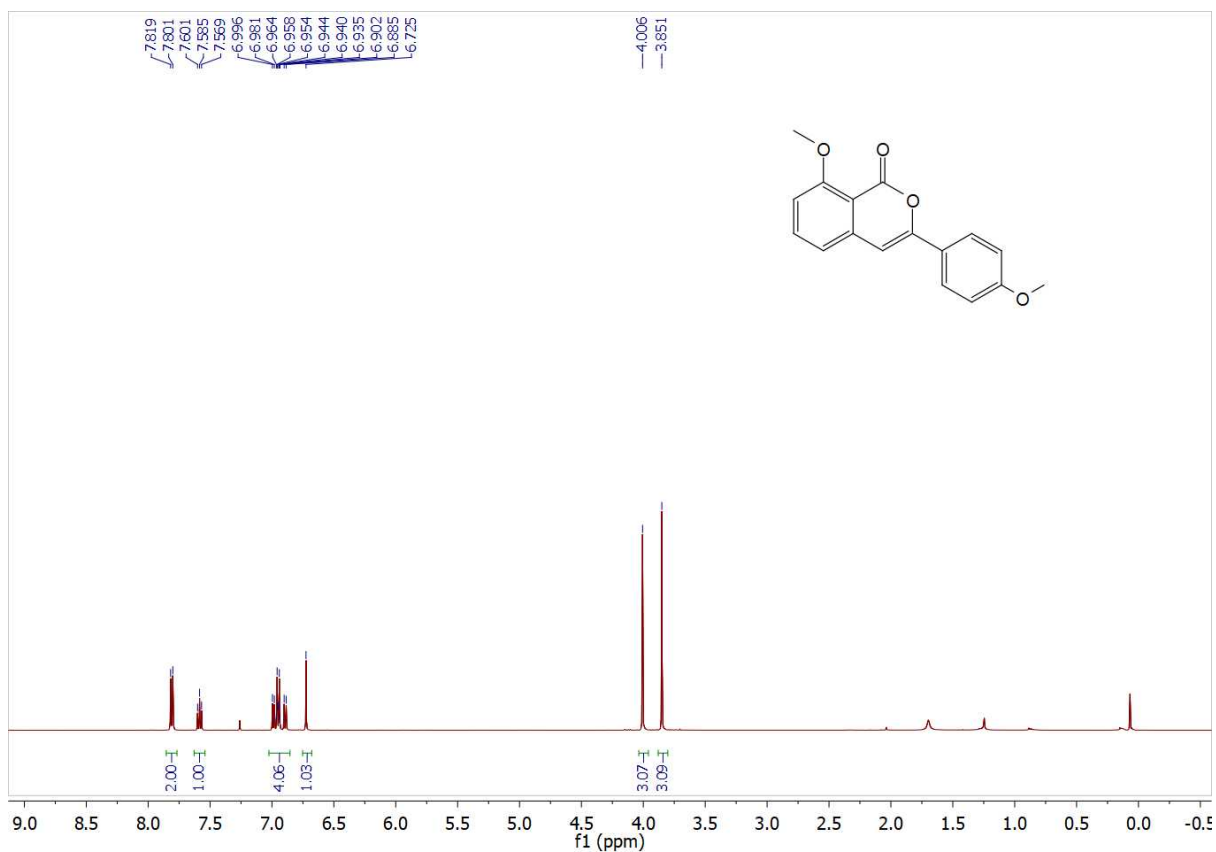

**$^1\text{H}$  NMR of compound 34**

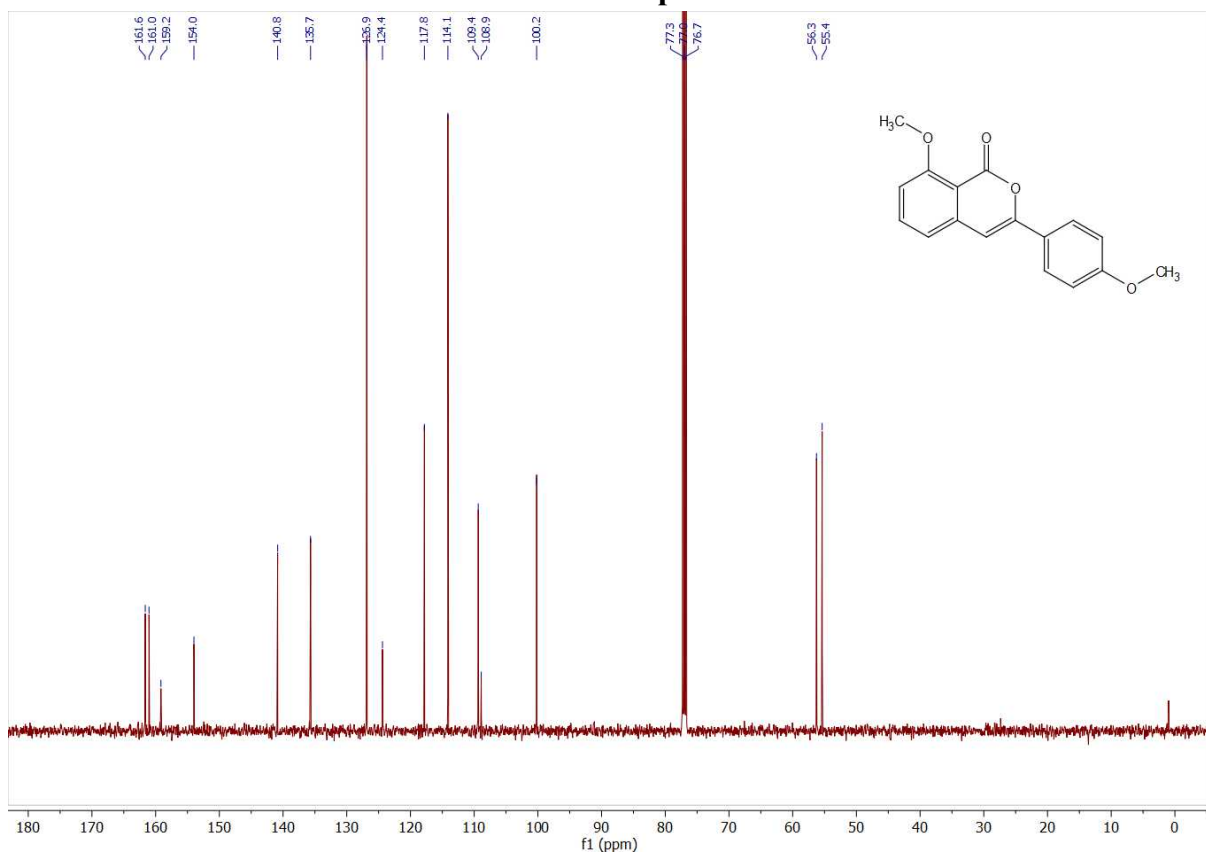

**$^{13}\text{C}\{\text{H}\}$  NMR of compound 34**

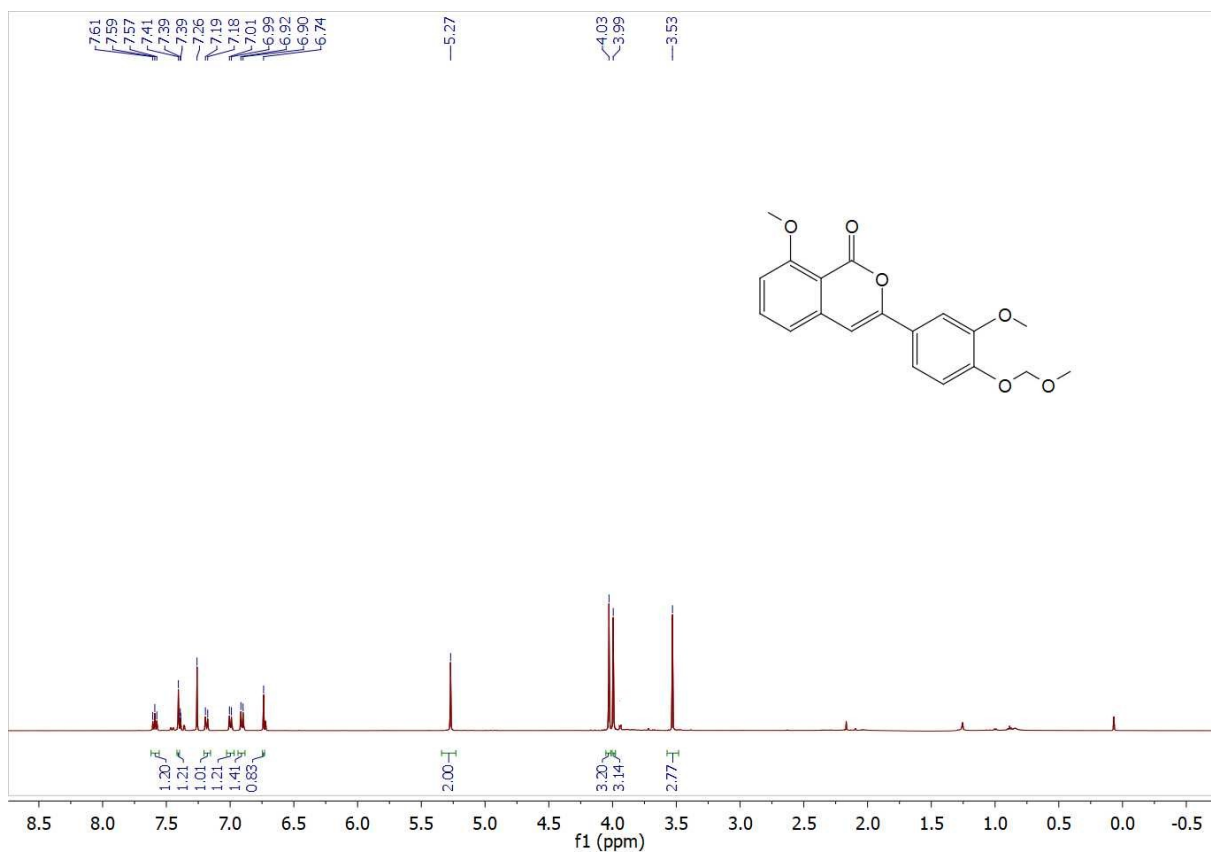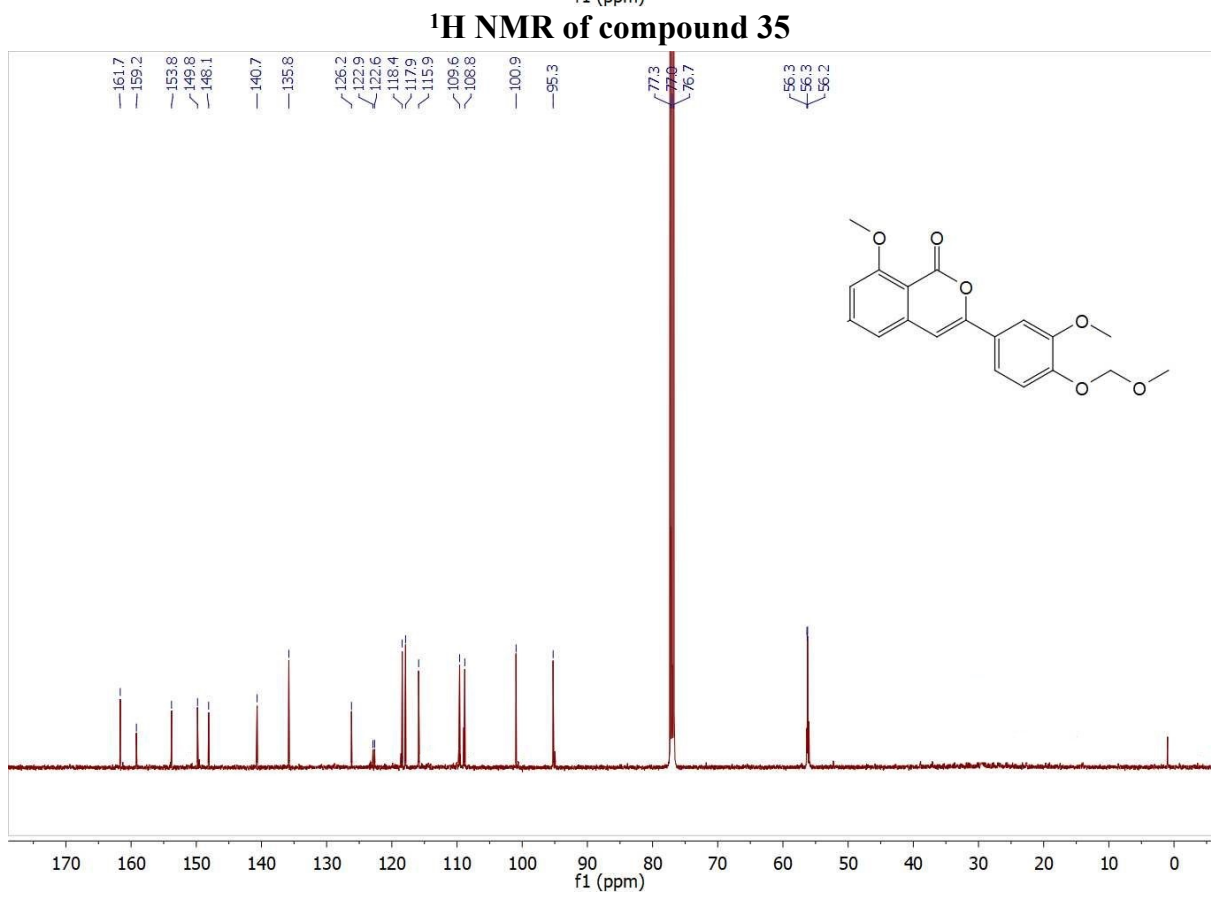



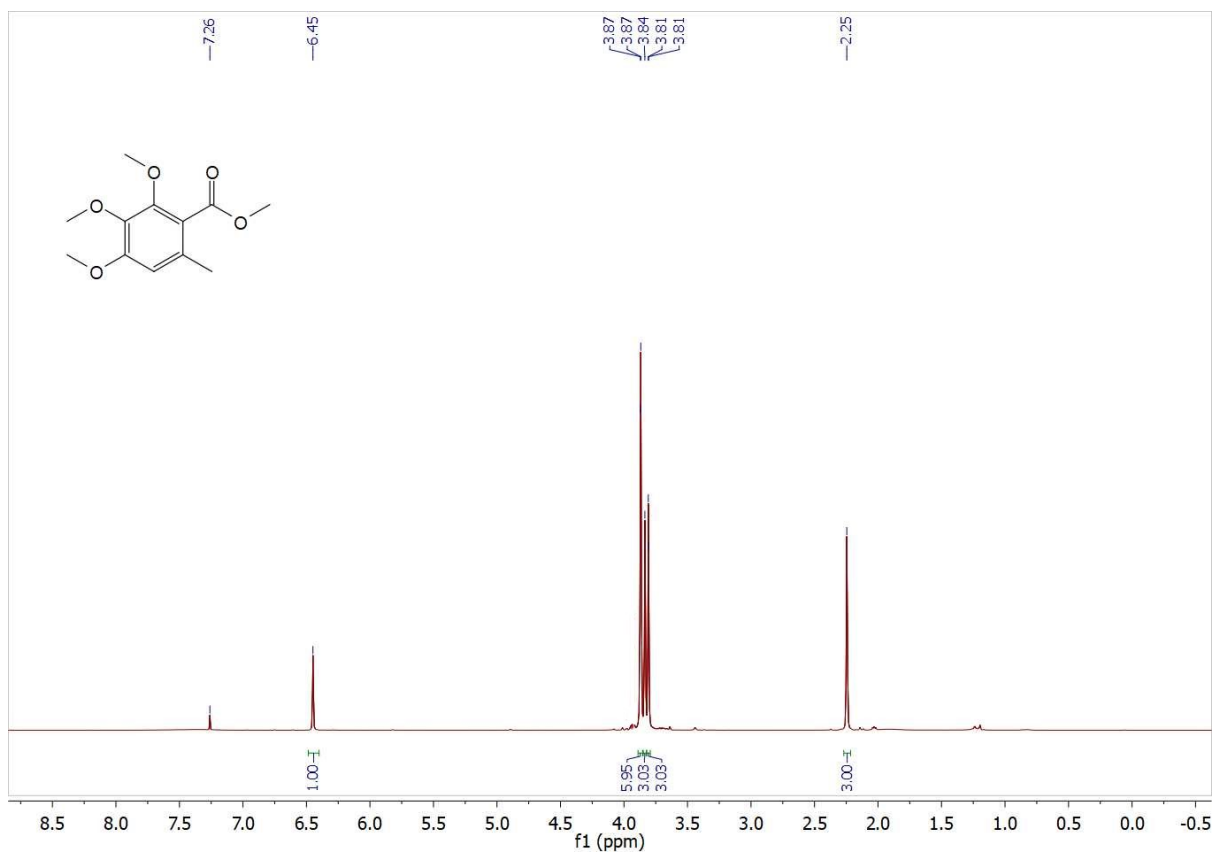

**<sup>1</sup>H NMR of compound 36a**

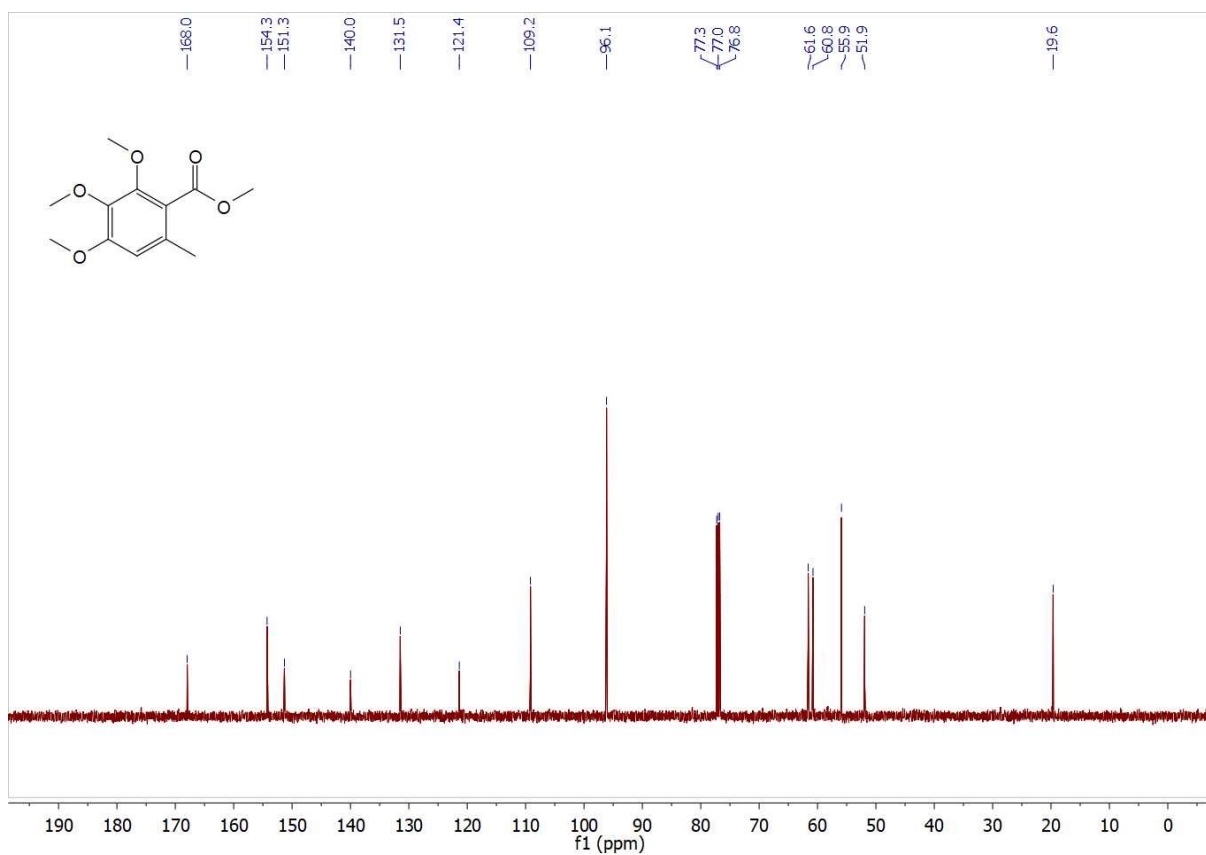

**<sup>13</sup>C{H} NMR of compound 36a**

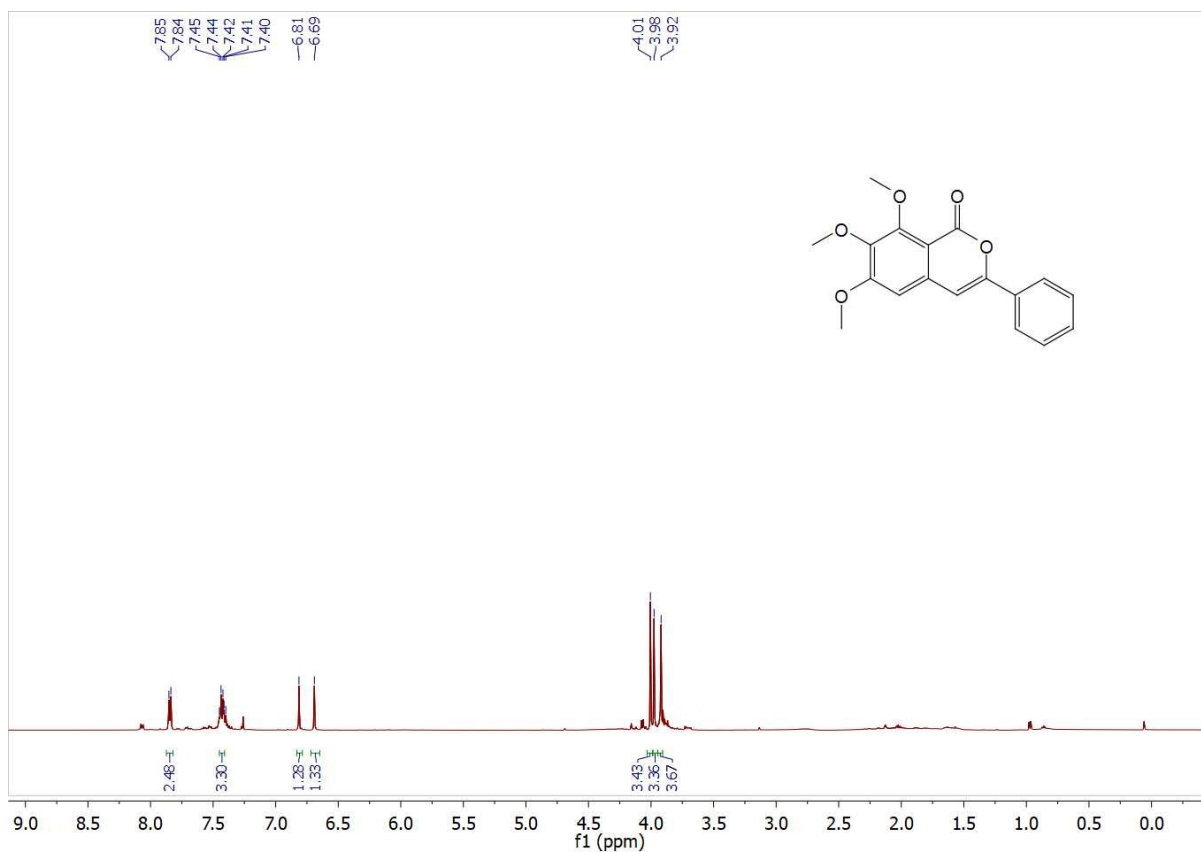

$^1\text{H}$  NMR of compound 36

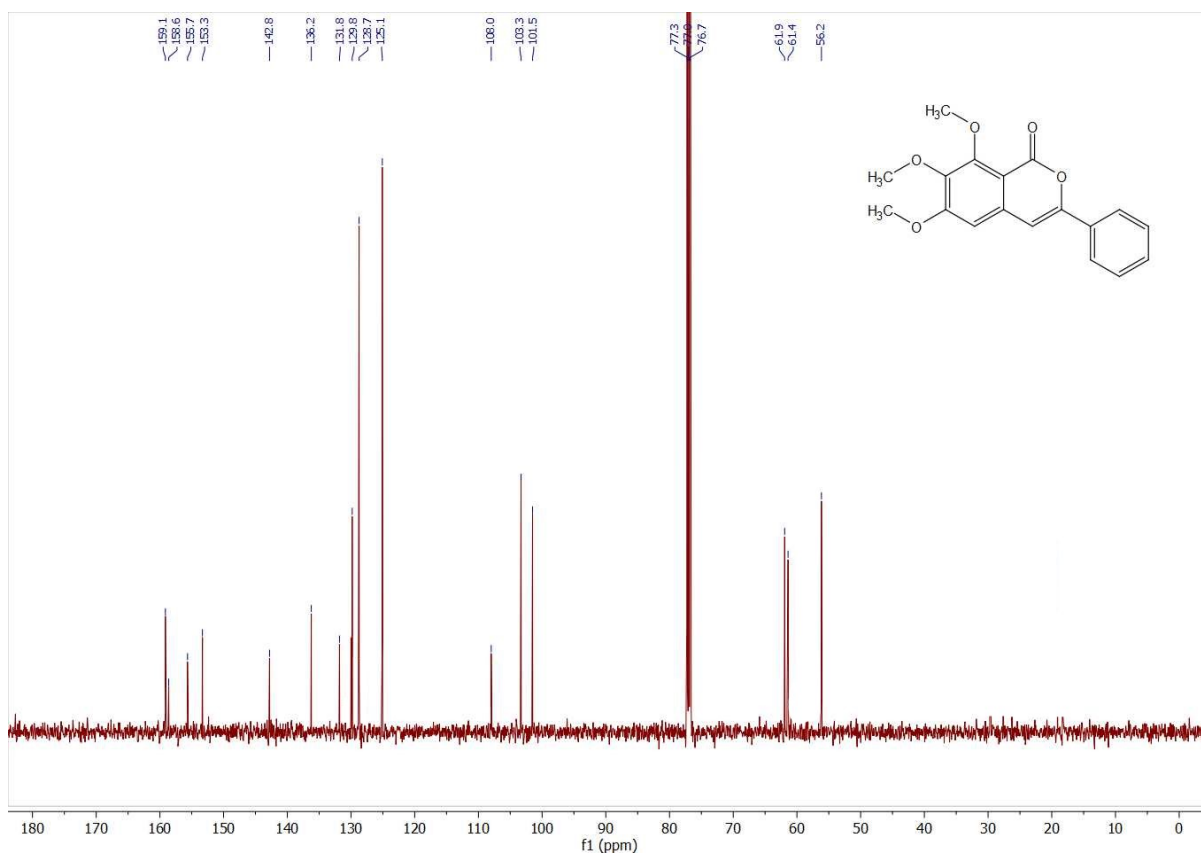

$^{13}\text{C}\{\text{H}\}$  NMR of compound 36

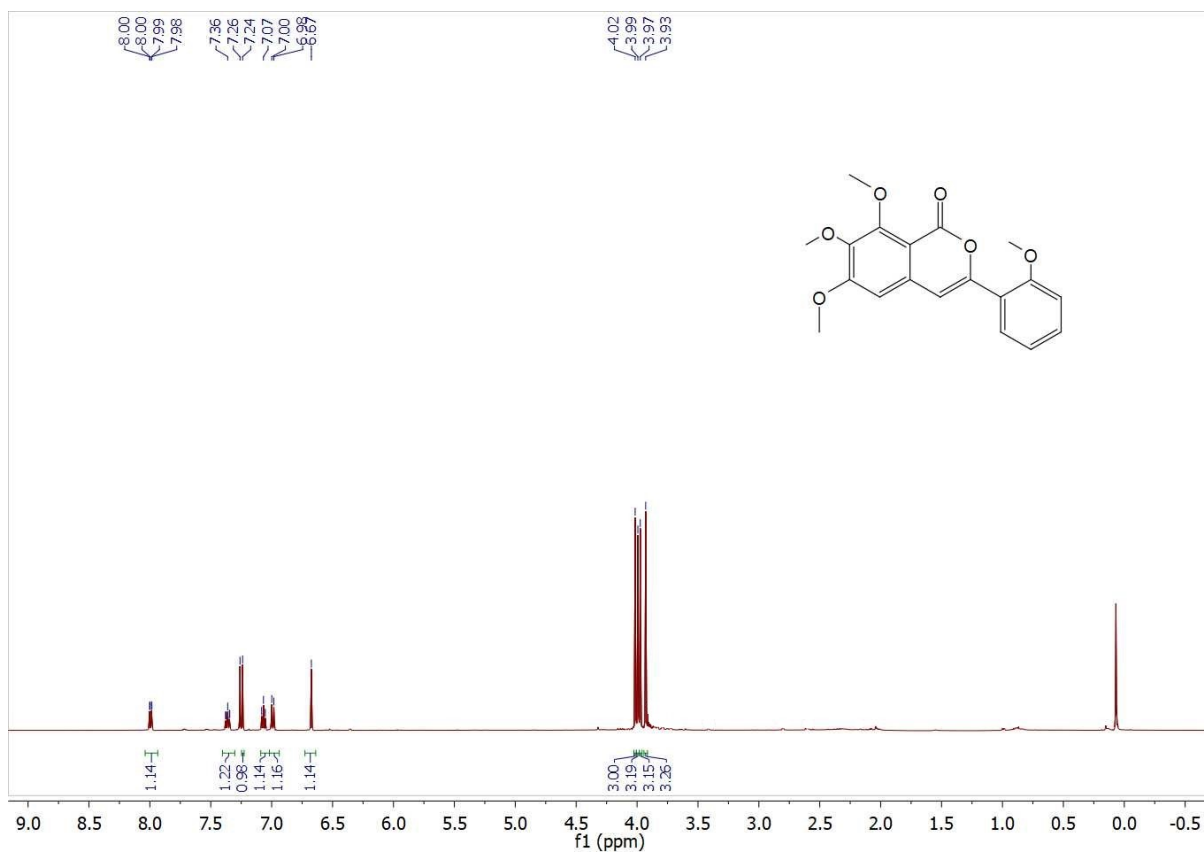

$^1\text{H}$  NMR of compound 37

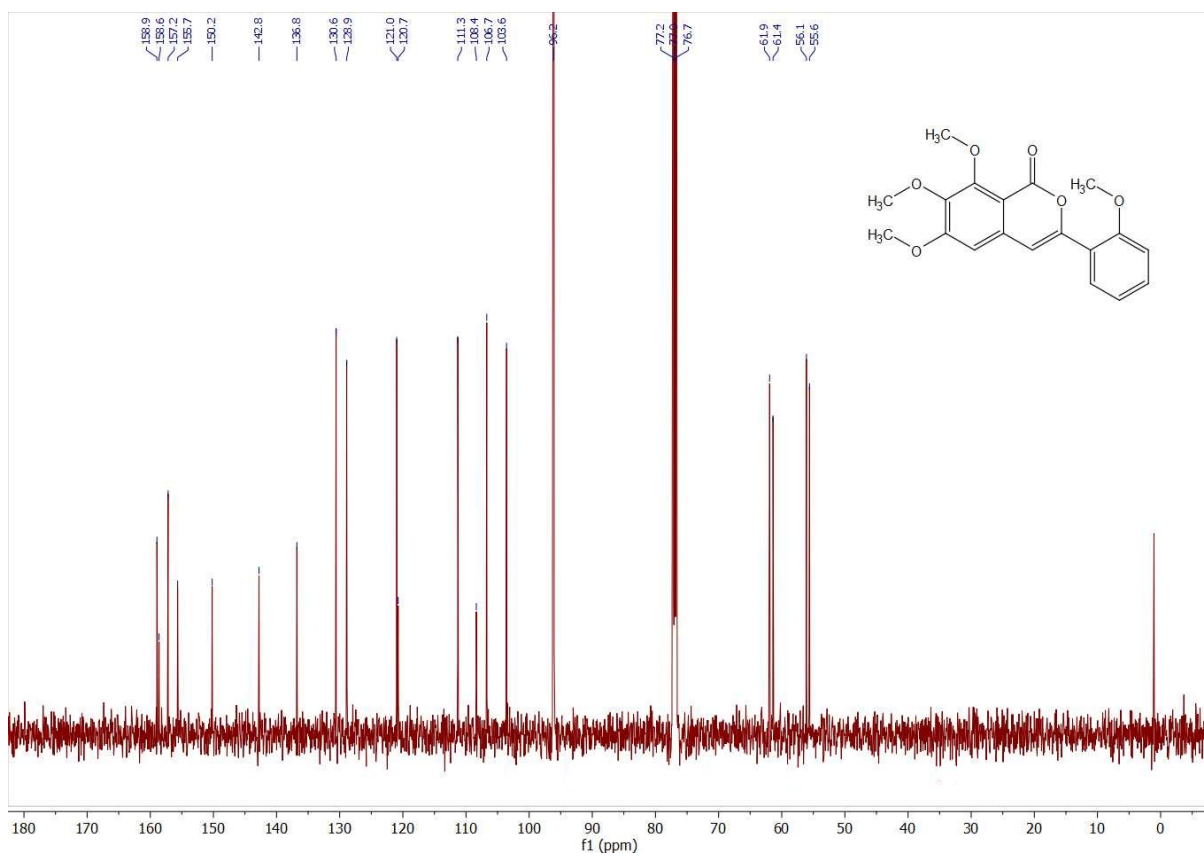

$^{13}\text{C}\{\text{H}\}$  NMR of compound 37

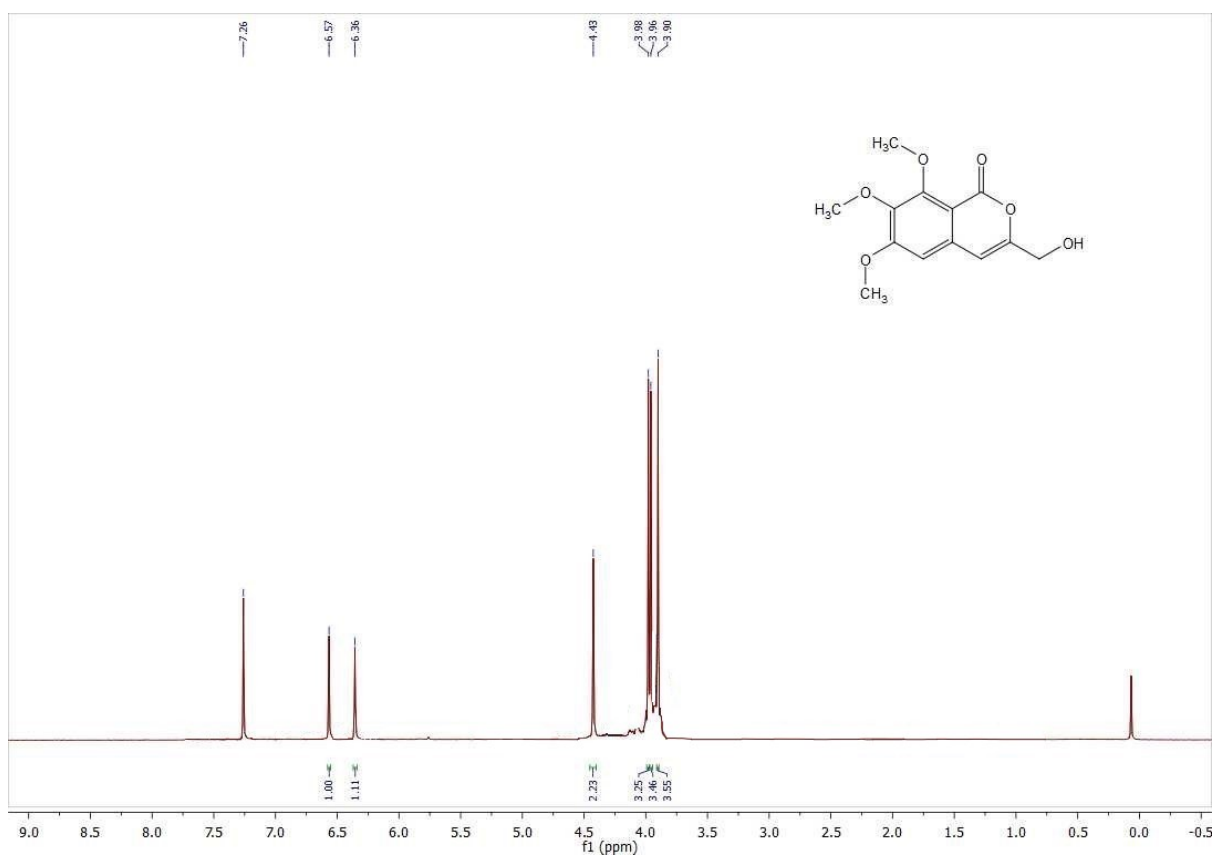

**<sup>1</sup>H NMR of compound 38**

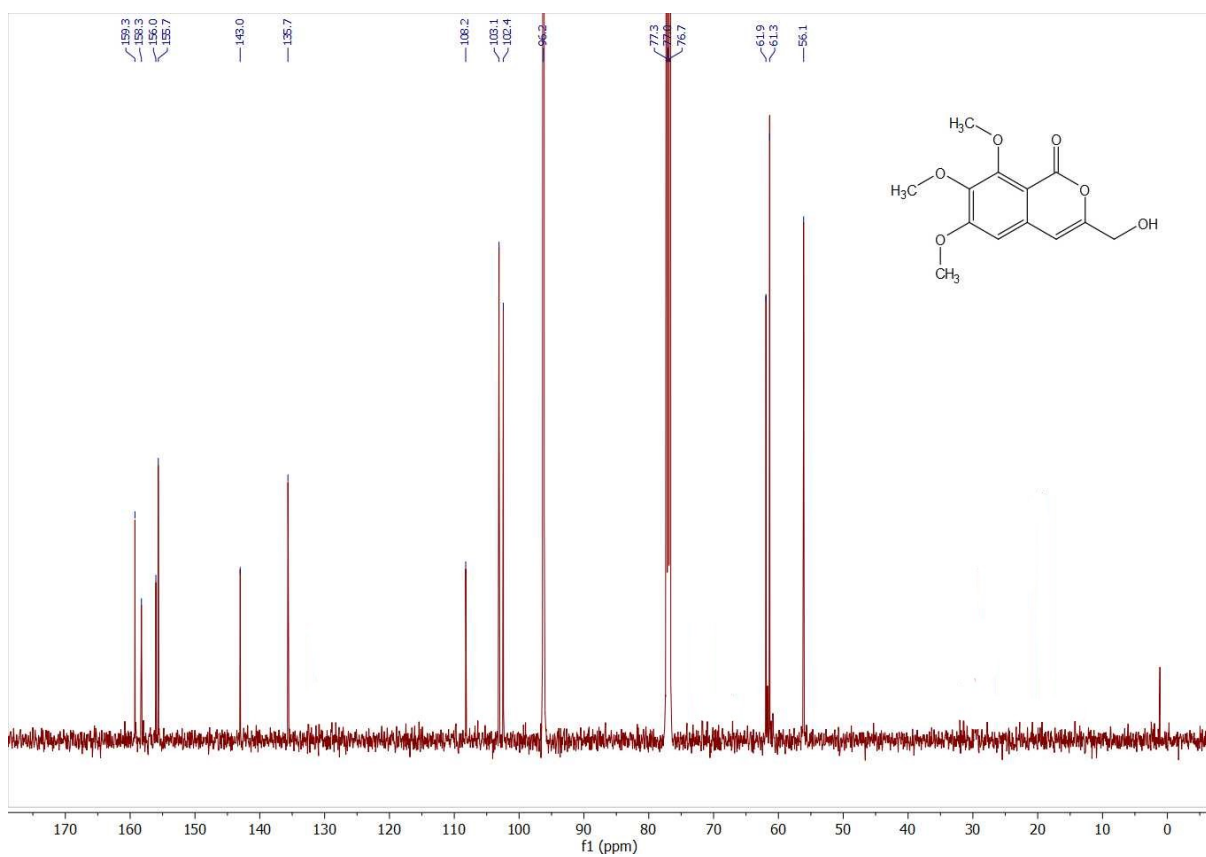

**<sup>13</sup>C{<sup>1</sup>H} NMR of compound 38**

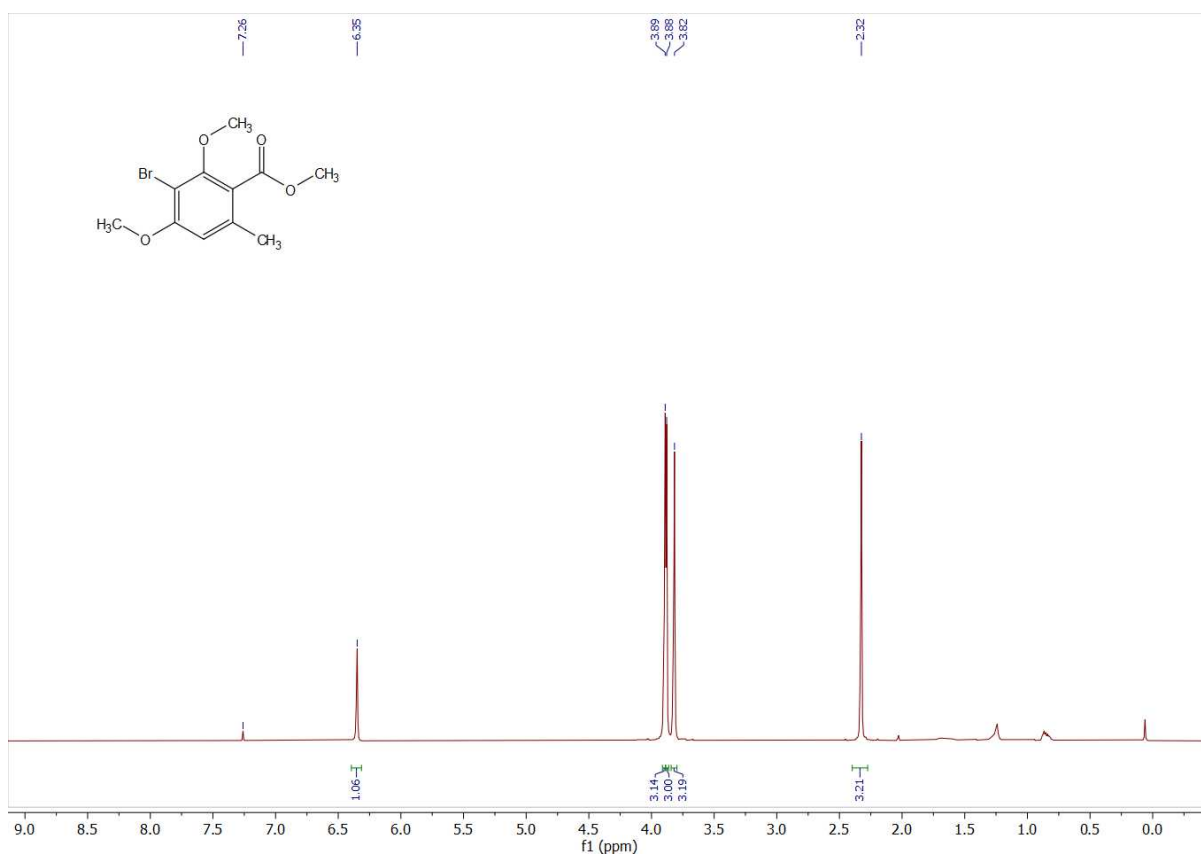

**<sup>1</sup>H NMR of compound 39a**

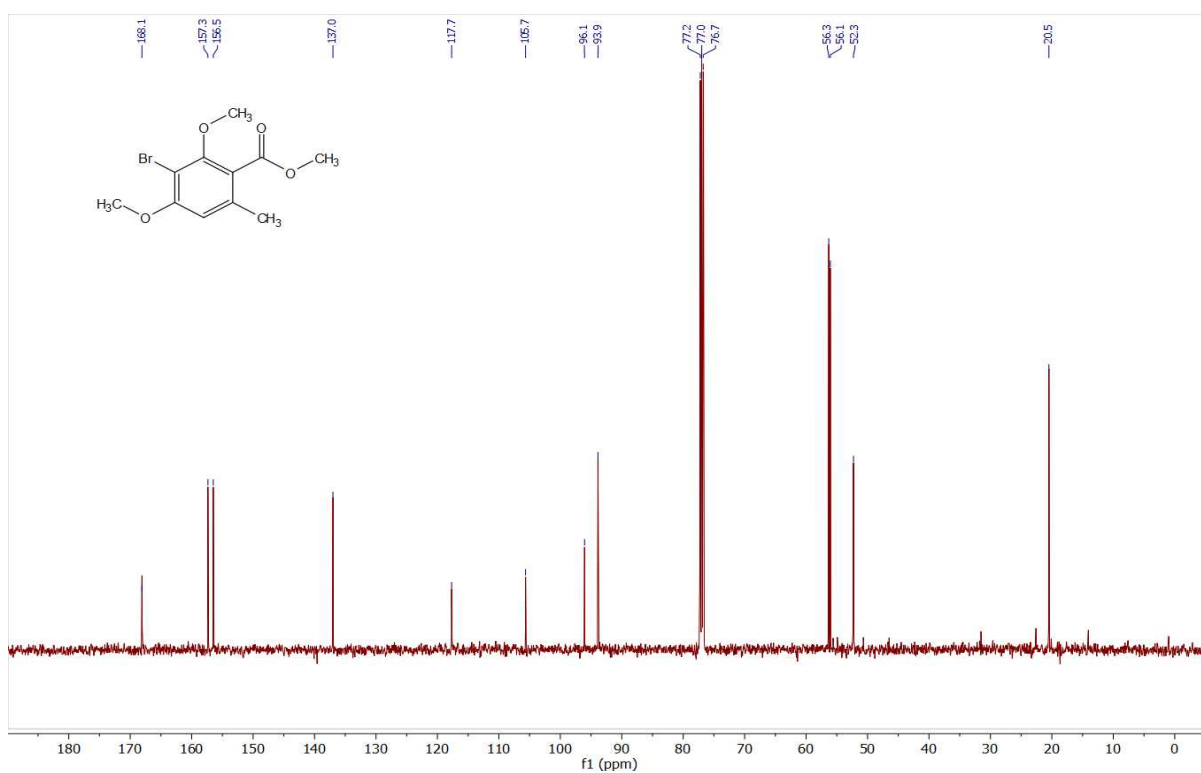

**<sup>13</sup>C{<sup>1</sup>H} NMR of compound 39a**

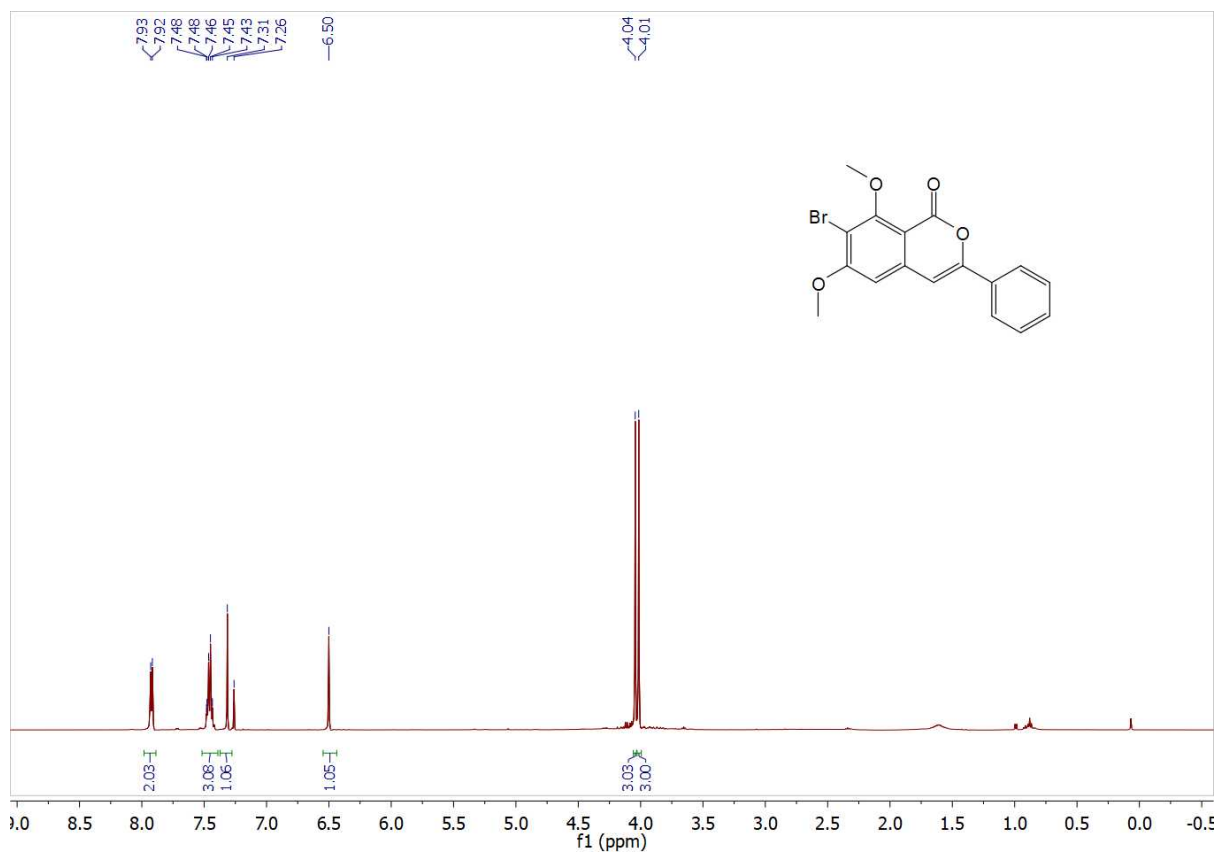

$^1\text{H}$  NMR of compound 39

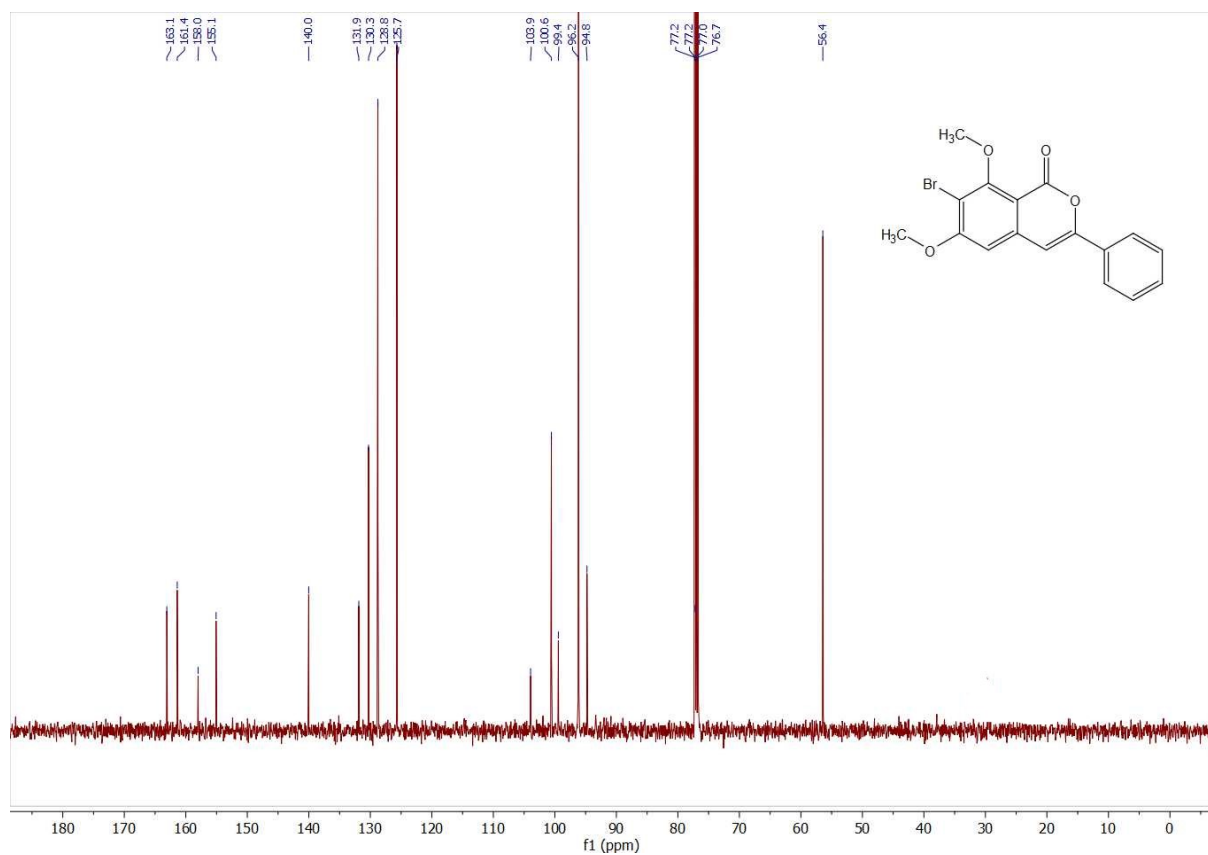

$^{13}\text{C}\{\text{H}\}$  NMR of compound 39

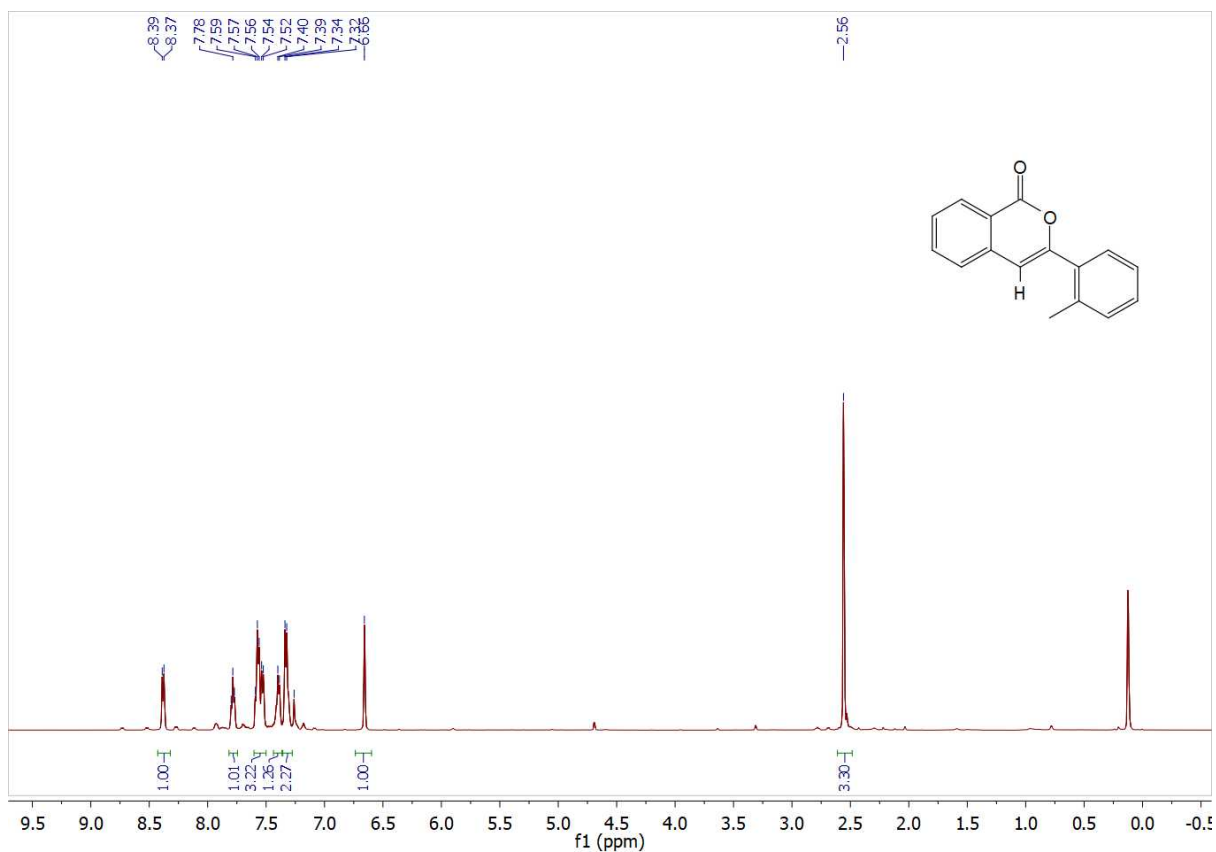

**<sup>1</sup>H NMR of compound 40**

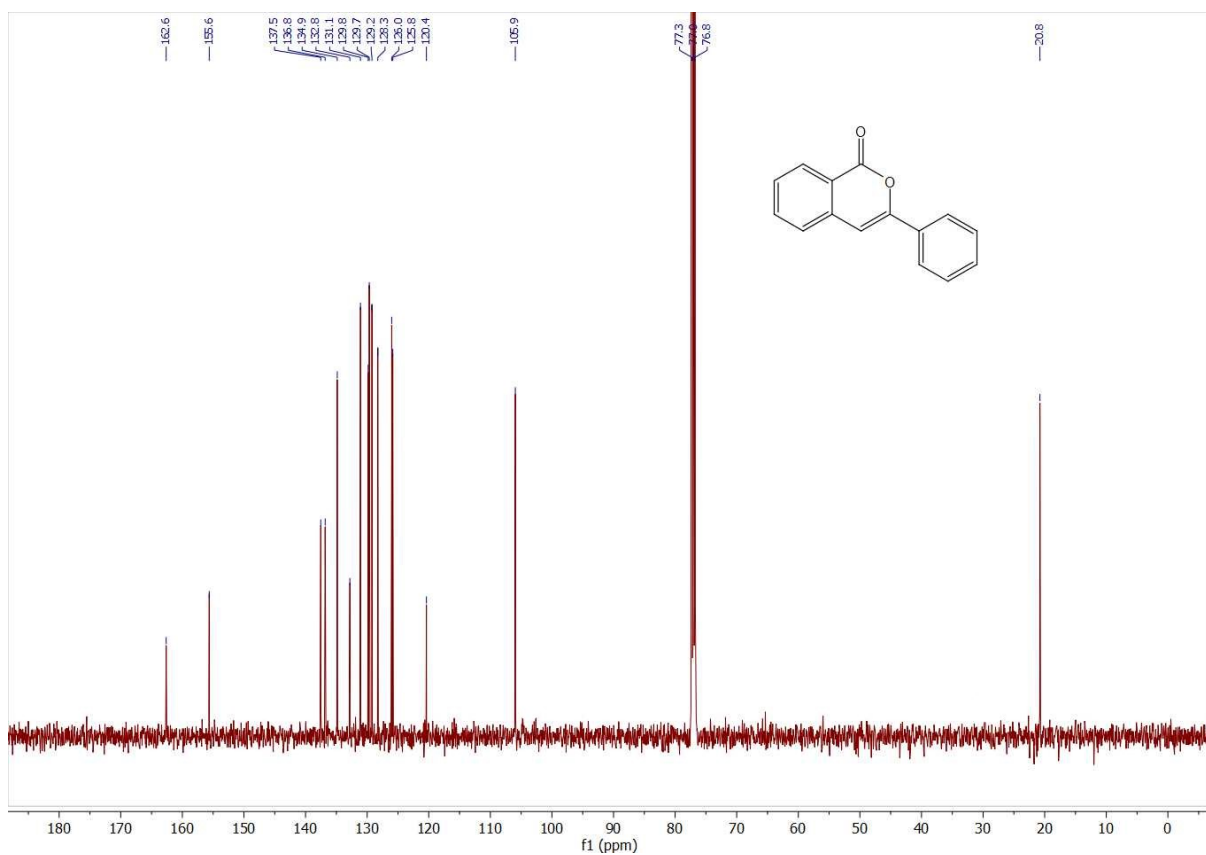

**<sup>13</sup>C{H} NMR of compound 40**

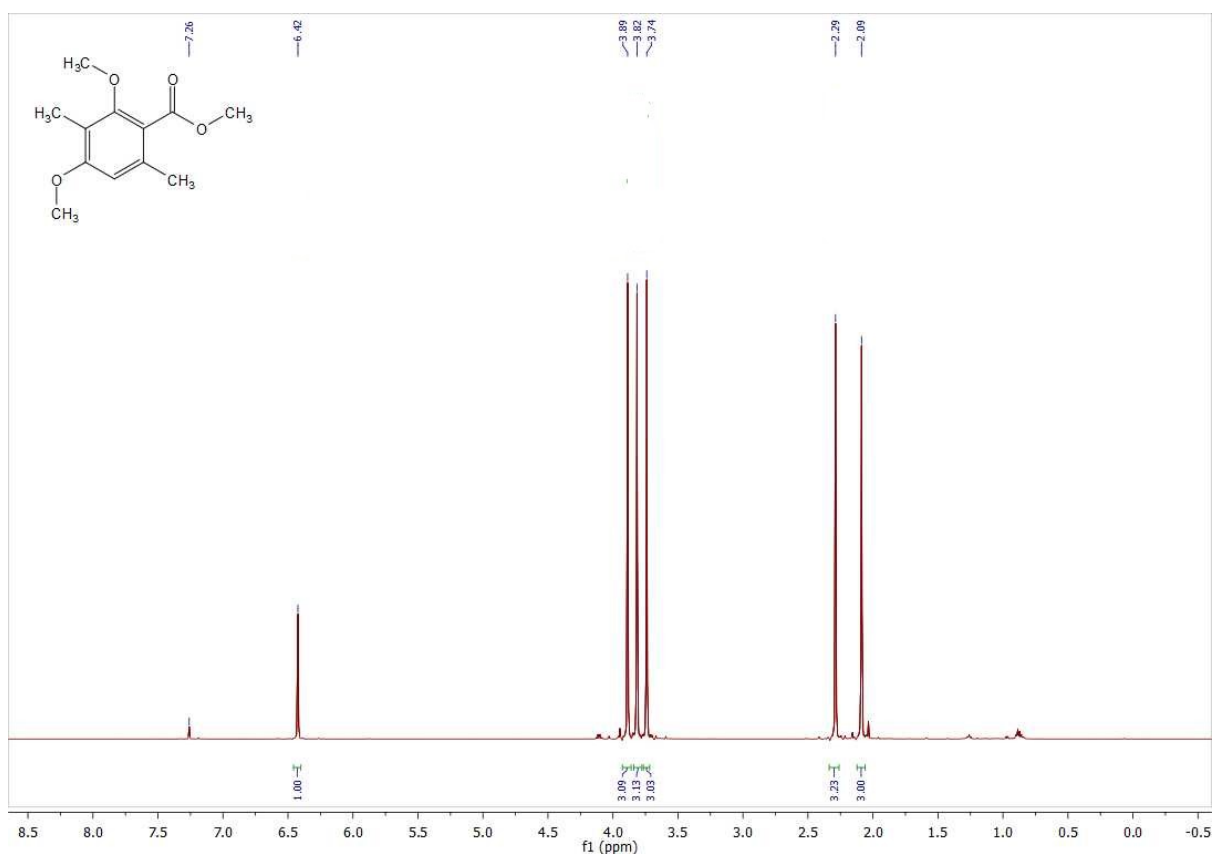

$^1\text{H}$  NMR of compound 44

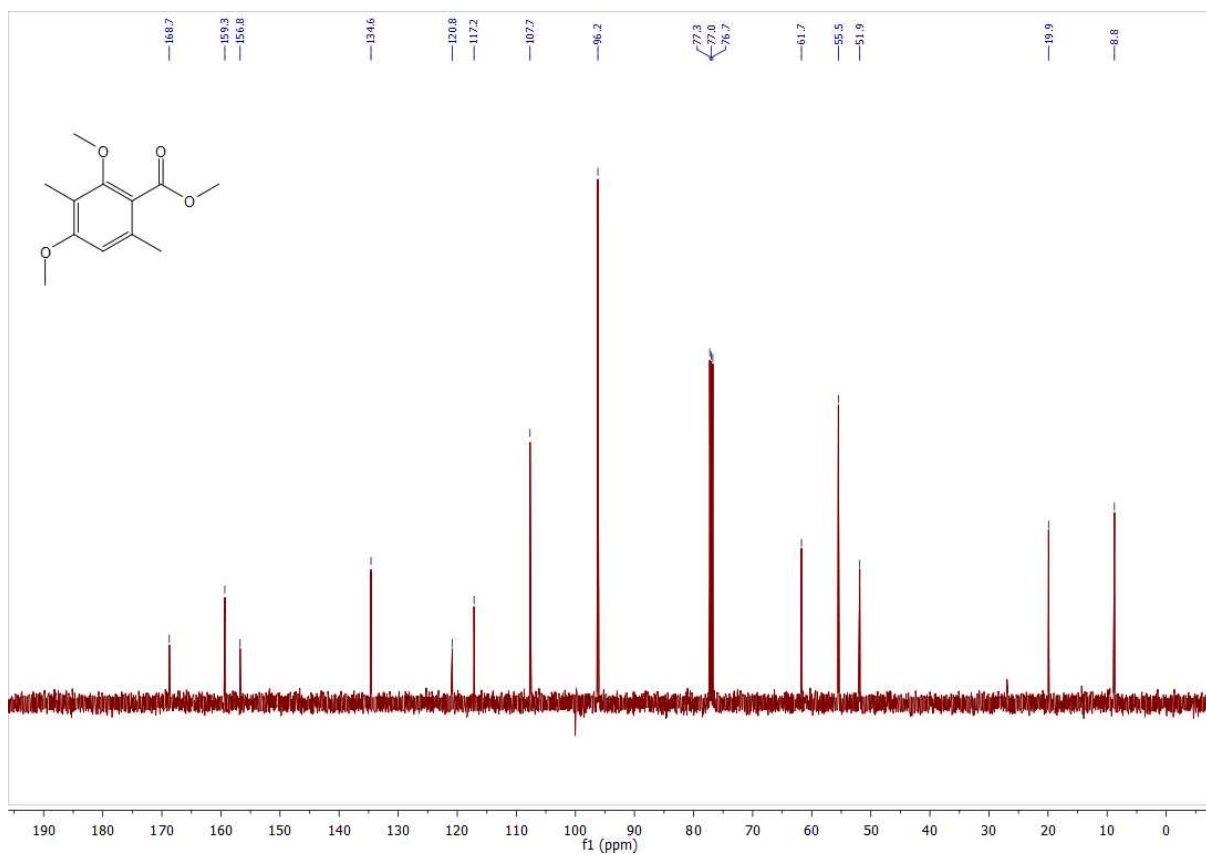

$^{13}\text{C}\{\text{H}\}$  NMR of compound 44



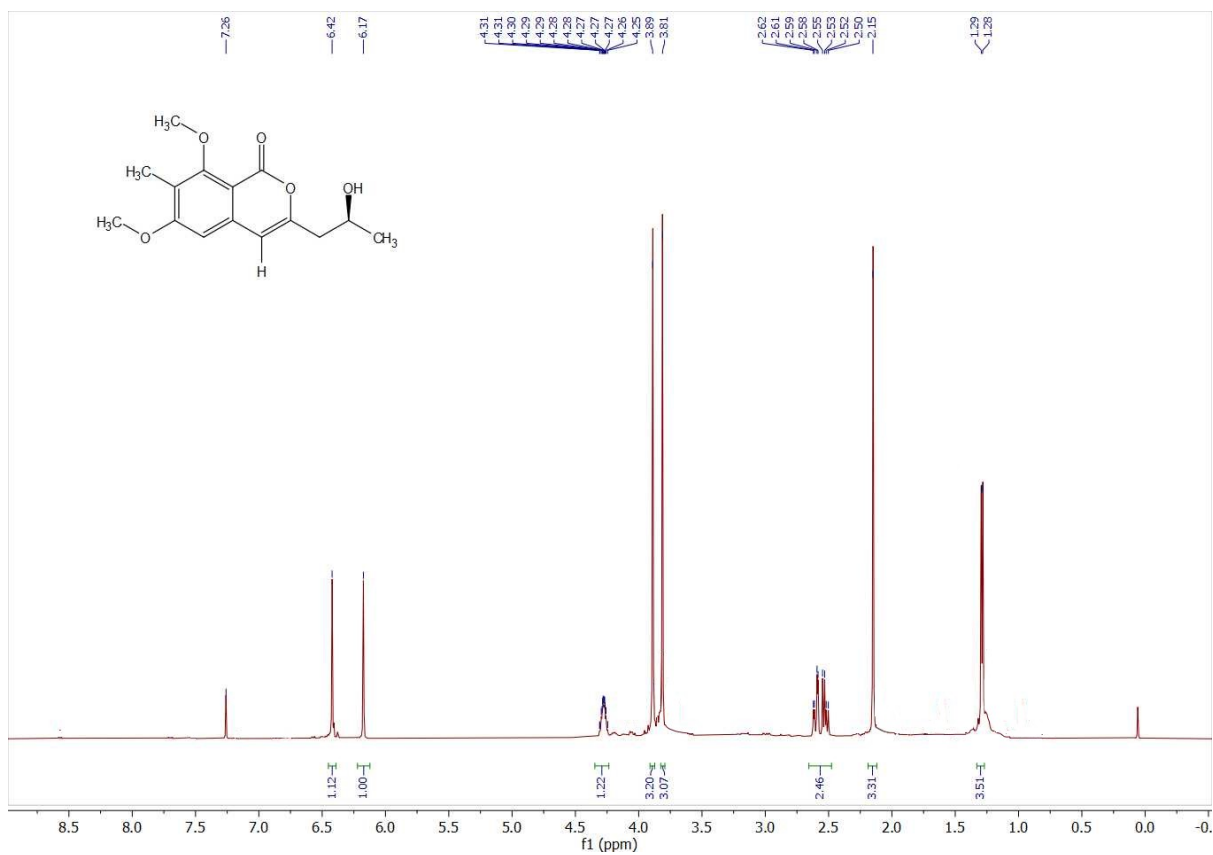

<sup>1</sup>H NMR of compound 45S

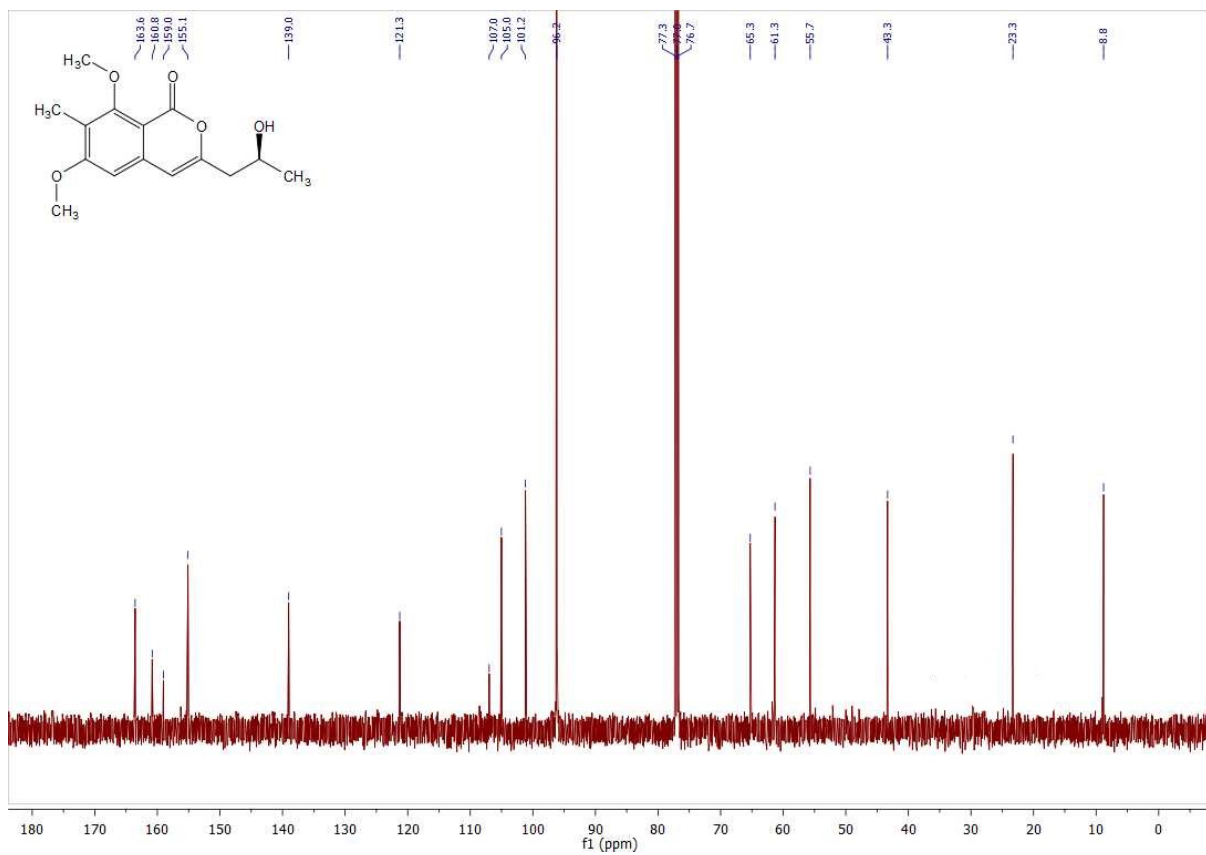

<sup>13</sup>C{H} NMR of compound 45S

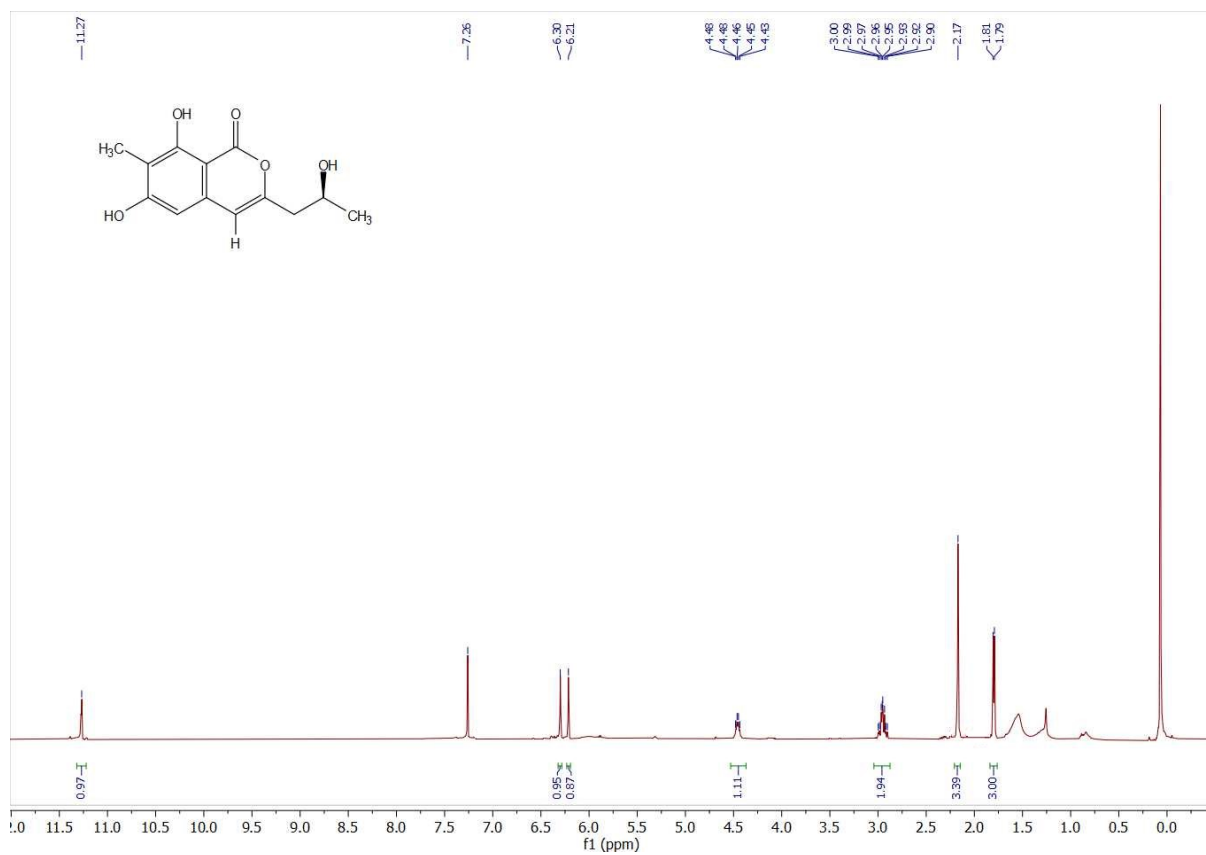

**<sup>1</sup>H NMR of Compound 46S**

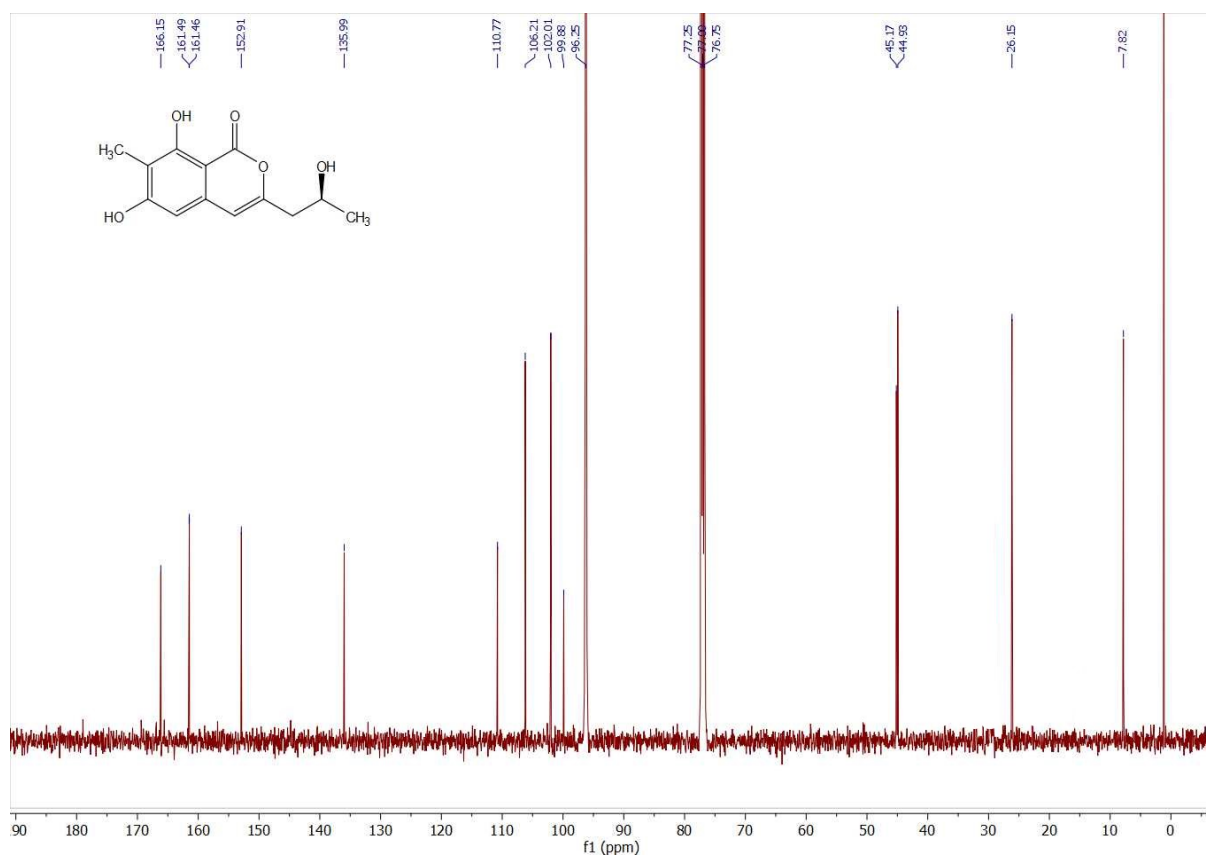

**<sup>13</sup>C{<sup>1</sup>H} NMR of Compound 46S**
